# Supplementary material for: Structured illumination microscopy combined with machine learning enables the high throughput analysis and classification of virus structure
Source: eLife journal article supplement (doi:10.7554/elife.40183), 2018-12-13
Supplement: supp [file elife-40183-supp-v1.zip › elife_poa_e40183_Figure_4_source_data_1.xlsx]

## Sheet: Fraction plot
Rod
Small spherical
Unknown
Large spherical
Filamentous
Filamentous
Filamentous
Unknown
Small filamentous
Large spherical
Filamentous
Unknown
Unknown
Filamentous
Small filamentous
Filamentous
Rod
Rod
Rod
Large spherical
Large spherical
Filamentous
Filamentous
Filamentous
Filamentous
Large spherical
Filamentous
Small filamentous
Filamentous
Filamentous
Filamentous
Unknown
Small spherical
Filamentous
Large spherical
Small spherical
Small filamentous
Small filamentous
Rod
Small filamentous
Filamentous
Large spherical
Small filamentous
Filamentous
Small filamentous
Unknown
Rod
Small filamentous
Filamentous
Unknown
Small filamentous
Small filamentous
Filamentous
Filamentous
Filamentous
Large spherical
Small filamentous
Filamentous
Filamentous
Filamentous
Large spherical
Small spherical
Large spherical
Large spherical
Unknown
Filamentous
Filamentous
Unknown
Unknown
Rod
Filamentous
Filamentous
Filamentous
Small filamentous
Large spherical
Filamentous
Rod
Large spherical
Small spherical
Rod
Large spherical
Unknown
Small filamentous
Large spherical
Unknown
Small filamentous
Unknown
Small filamentous
Filamentous
Rod
Large spherical
Large spherical
Small filamentous
Filamentous
Rod
Small filamentous
Small filamentous
Unknown
Filamentous
Filamentous
Small filamentous
Small filamentous
Filamentous
Filamentous
Small filamentous
Filamentous
Small filamentous
Unknown
Filamentous
Large spherical
Filamentous
Small spherical
Unknown
Filamentous
Small spherical
Unknown
Large spherical
Large spherical
Large spherical
Unknown
Filamentous
Filamentous
Large spherical
Filamentous
Filamentous
Large spherical
Small spherical
Filamentous
Rod
Filamentous
Small spherical
Large spherical
Small spherical
Unknown
Filamentous
Unknown
Filamentous
Unknown
Unknown
Small filamentous
Large spherical
Unknown
Large spherical
Large spherical
Small spherical
Filamentous
Unknown
Large spherical
Large spherical
Unknown
Unknown
Filamentous
Unknown
Rod
Small filamentous
Filamentous
Large spherical
Filamentous
Filamentous
Unknown
Filamentous
Large spherical
Small filamentous
Filamentous
Filamentous
Unknown
Unknown
Rod
Unknown
Filamentous
Large spherical
Filamentous
Filamentous
Large spherical
Small filamentous
Unknown
Filamentous
Large spherical
Small filamentous
Large spherical
Filamentous
Filamentous
Filamentous
Small filamentous
Large spherical
Rod
Filamentous
Filamentous
Small spherical
Small filamentous
Rod
Small filamentous
Filamentous
Unknown
Rod
Unknown
Unknown
Small filamentous
Filamentous
Filamentous
Filamentous
Filamentous
Filamentous
Filamentous
Filamentous
Small filamentous
Filamentous
Filamentous
Small spherical
Filamentous
Filamentous
Small filamentous
Unknown
Small filamentous
Unknown
Filamentous
Filamentous
Small filamentous
Filamentous
Filamentous
Small spherical
Rod
Unknown
Unknown
Unknown
Large spherical
Small filamentous
Filamentous
Large spherical
Large spherical
Filamentous
Small spherical
Unknown
Filamentous
Small spherical
Large spherical
Unknown
Unknown
Unknown
Small filamentous
Unknown
Filamentous
Large spherical
Filamentous
Filamentous
Large spherical
Large spherical
Small spherical
Filamentous
Large spherical
Filamentous
Unknown
Filamentous
Large spherical
Small spherical
Filamentous
Small spherical
Small spherical
Large spherical
Unknown
Small filamentous
Small filamentous
Small filamentous
Large spherical
Filamentous
Large spherical
Large spherical
Small spherical
Unknown
Filamentous
Large spherical
Filamentous
Large spherical
Small filamentous
Filamentous
Filamentous
Filamentous
Small spherical
Unknown
Large spherical
Unknown
Filamentous
Filamentous
Large spherical
Small spherical
Small filamentous
Unknown
Filamentous
Small filamentous
Small filamentous
Rod
Small filamentous
Filamentous
Large spherical
Small filamentous
Rod
Small filamentous
Filamentous
Rod
Rod
Filamentous
Filamentous
Rod
Small filamentous
Filamentous
Small filamentous
Unknown
Unknown
Filamentous
Rod
Unknown
Small spherical
Filamentous
Filamentous
Large spherical
Small filamentous
Large spherical
Large spherical
Small filamentous
Filamentous
Filamentous
Filamentous
Filamentous
Large spherical
Filamentous
Unknown
Rod
Large spherical
Unknown
Small filamentous
Large spherical
Small spherical
Unknown
Large spherical
Large spherical
Unknown
Filamentous
Large spherical
Filamentous
Unknown
Filamentous
Filamentous
Small filamentous
Rod
Small filamentous
Large spherical
Rod
Filamentous
Filamentous
Small spherical
Small filamentous
Small filamentous
Small spherical
Large spherical
Filamentous
Unknown
Small filamentous
Small filamentous
Unknown
Filamentous
Small spherical
Small filamentous
Large spherical
Filamentous
Large spherical
Filamentous
Filamentous
Small spherical
Large spherical
Large spherical

## Sheet: Dataset 1
Filamentous length	Filamentous persistence length	Small filamentous length	Large spherical ELM radius	Large spherical equivalent radius	Small spherical radius	Unknown equivalent radius	Rod length	Rod diameter
1055.06	883.276	301.255	85.1855	132.67	98.8862	412.092	978.875	131.107
397.255	65535	213.019	124.008	191.917	122.449	172.225	293.19	128.559
458.039	756.573	213.019	171.395	257.864	108.324	360.177	649.733	106.565
746.039	7084.66	45.2548	147.645	225.495	100.521	263.49	171.752	194.362
418.274		154.51		103.713	93.8117	382.133	378.23	121.459
341.019		122.51	107.905	162.487	103.713	193.608	751.241	111.008
917.019	398.074	109.255	86.1633	141.007	106.809	313.746	698.855	140.961
386.274	180.782	173.255	121.899	163.487	97.2241	218.894	778.145	104.998
1158.82	62871.5	109.255	87.8739	131.436	100.521	182.337	705.761	132.24
282.51	811134	231.765	86.425	135.104	102.129	284.316	360.161	134.355
604.784	33.8062	122.51	122.818	179.636	90.2703	254.043	722.976	135.375
282.51		141.255	61.5301	103.713	109.819	119.757	191.281	184.476
263.765		250.51	97.5178	144.433	95.5331	416.028	615.499	133.243
314.51		141.255	161.217	242.221	90.2703	170.322	214.506	149.222
1177.57	113.663	122.51	133.666	203.459	90.2703	326.973	905.421	124.969
1720.63	61.2534	263.765	119.216	182.337	93.8117	143.3	580.888	92.8168
245.019		167.764	130.522	187.623	95.5331	126.378	1604.06	130.362
1055.06	2.82345e+06	327.764	94.7518	147.779	102.129	255.961	26.162	192.122
959.058	461.434	122.51		218.894	111.293	200.229	1470.03	117.358
642.274	338.558	96	80.2028	131.436	105.272	295.006	638.713	89.3567
1036.31	269.231	295.765	166.254	250.164	90.2703	139.846	95.1765	120.935
554.039	157.301	231.765	70.0882	118.388	92.058	165.468	312.883	122.91
1353.1	2668.53	263.765	145.493	234.703	97.2241	171.276	888.996	93.3204
469.019	42.2609	218.51	71.4439	121.11	115.602	317.362	600.196	94.7035
708.548	74.6198	141.255	105.15	149.968	98.8862	327.471	450.414	117.738
263.765		205.255	91.5008	132.67	90.2703	234.007	718.092	121.729
663.293	23.2795	128	71.4064	111.293	106.809	246.886	414.772	113.149
1036.31	2248.65	263.765	82.6195	125.082	100.521	236.777
727.293	29.1065	154.51		97.2241	125.082	284.316
295.764		154.51		93.8117		287.734
1409.33	318.292	277.019	197.595	288.865		200.229
1124.55	184.122	322.274	72.2305	126.378		221.116
1183.06	942.852	173.255	98.2305	155.307		162.487
977.803	356.325	141.255	65.7094	111.293		201.851
668.784	1452.54	186.51	113.282	165.468		339.685
380.784	25.9683	154.51	77.1629	122.449		196.947
1673.1	3844.48	231.765	182.219	250.815		184.116
1108.08	296.155	160	93.7274	142.158		378.705
231.765		173.255	132.153	189.353		418.372
1183.06	5240.14	173.255	147.827	216.649		180.541
623.529	34.1401	205.255	158.964	233.31		223.316
945.803	66.0194	309.019	-24839.7	121.11		310.089
623.529	216.926	231.765	99.6067	152.126		139.846
205.255	36.271	167.765	94.5532	156.353		153.194
719.529	165.016	205.255	146.358	240.194		328.465
977.803	635.628	154.51	172.827	273.208		316.333
959.058	72.8052	77.2548	102.879	161.48		196.947
186.51		109.255	76.287	127.662		222.585
290.274	1.17708e+07	167.764	98.9824	149.968		244.231
650.039	175.451	218.51	8171.46	179.636		317.362
508.784	27.3447	218.51		114.184		182.337
399.529		231.765	73.7964	115.602		136.305
508.784	49.8881	282.51	134.341	213.619		234.007
533.019	11.9822	154.51	156.159	232.61		370.438
778.039	23637.5	282.51	110.073	158.424		287.734
437.019	176842	213.019	83.1441	143.3		176.893
335.529	280.746	213.019	148.094	234.007		169.362
231.765		277.019	97.4548	189.353		329.456
303.529	35.8489	245.019	8.26437	170.322		316.848
335.529		263.764	108.295	177.812		263.49
186.51			103.961	144.433		149.968
463.529	108.904		7.23835	133.893
1041.8	62.5622		105.832	153.194
354.274	75.7663		174.98	240.871
469.019	306835		136.026	196.947
263.764	977.352		136.885	205.848
631.293	470.986		71.7027	130.19
495.529	40.9678		96.3719	161.48
450.274	179.415		126.063	173.169
1098.04	261.695
2170.9	317.555
322.274
618.039	33.1824
327.764
346.51
386.274	2403.7
1321.1	367.198
727.293	15.8075
1305.57	133.952
1036.31	243.933
842.039	27.417
589.255	384.103
1188.55	68.1719
1164.31	101.481
618.039	43.22
269.255
463.529	446.49
919.293	15.8078
1009.8	179.807
977.803	94.3772
346.51	490.579
495.529	15.3526
1300.08	66.1386
399.529
218.51
2275.61	178.07
2197.41	552.273
1236.08	91.3153
167.764
444.784	67.3181
450.274	82.3107
636.784	642.898
245.019
495.529	491.739
668.784	11.5567
695.293	83454.3
663.293	5.04551
1113.57	56.7155
1062.82	2585.66
405.019	409.094
847.529	3364
250.51
996.548	18086.6
1158.82	216.754
810.039	358.437
1047.29	96.6899
604.784	186.944
934.822	462.925
199.765
714.039	60.3272
508.784	1.3046e+06
687.529	79.8818
1518.59	285.316
482.274	226.587

## Sheet: Dataset 2
Filamentous length	Filamentous persistence length	Small filamentous length	Large spherical ELM radius	Large spherical equivalent radius	Small spherical radius	Unknown equivalent radius	Rod length	Rod diameter
199.765		192	93.9811	156.353	97.2241	296.109	1415.49	74.6661
295.765		231.765	85.9506	133.893	131.436	304.253	351.219	139.17
309.019	118.816	495.529	103.581	175.969	98.8862	200.229	293.803	124.069
122.51		213.019	92.0616	161.48	130.19	191.917	816.604	104.807
327.764	130.676	231.765	107.581	182.337	109.819	237.464	181.007	126.681
405.019	650933	213.019	137.57	270.811	98.8862	316.848	1745.4	94.5524
1087.06	351.325	437.019	99.3398	144.433	93.8117	291.672	810.471	104.206
320	43.9022	269.255	74.3189	123.772	133.893	160.468	216.385	101.474
932.548	68.4345	218.51	85.809	133.893	95.5331	275.583	1351.38	134.657
277.019		250.51	110.954	173.169	92.058	188.49	489.258	115.881
559.529	50.858	64	130.317	192.765	108.324	480.727	131.803	149.178
335.529		309.019	135.664	217.4	108.324	226.217	1134.25	118.978
921.568	544.991	199.765	102.812	188.49	115.602	257.864	426.124	162.17
469.019	196.747	199.765	102.886	158.424	109.819	336.31	43.6595	131.347
167.764		218.51	97.4468	162.487	109.819	208.21	407.812	96.8322
1087.06	14.2934	367.529	73.6613	125.082	97.2241	180.541
1068.31	39.2664	250.51	101.929	155.307	95.5331	276.764
1361.8	41.7283	346.51	79.1448	126.378	123.772	614.369
282.51		173.255	145.882	269	109.819	244.897
365.255	118.245	173.255	89.9208	145.557	130.19	261.628
391.764	48.1952	199.764	109.678	173.169	92.058	332.411
277.019		199.765	154.15	252.757	95.5331	213.619
367.529	18.3539	218.51	83.7797	133.893	127.662	265.34
410.51	31679.3	141.255	116.078	164.48	127.662	208.991
855.293	48.784	109.255	82.8897	131.436	95.5331	392.235
881.803	1095.04	309.019	166.732	249.512	100.521	179.636
263.765		199.765	90.9895	143.3	100.521	413.671
1254.82	496.954	277.019	94.7198	149.968	97.2241	320.936
314.51		199.764	107.381	177.812	97.2241	259.753
650.039	477.342	160	91.2808	143.3	90.2703	481.066
1409.33	909.712	218.51	95.1981	159.449	108.324	367.346
277.019		186.51	76.1214	127.662	106.809	201.851
314.51	19.6975	231.765	114.33	178.726		237.464
522.039	21.4807		84.798	139.846		320.428
591.529	515.296		120.618	178.726		243.563
719.529	29.5819		80.4884	136.305		159.449
437.019	638.568		156.345	214.38
1337.57	232.42		73.7251	128.932
642.274	121.834		138.515	215.139
418.274	28.9859		159.56	224.045
802.274	4052.6		78.0456	119.757
644.548	24.5113		94.9127	159.449
932.548	52.1806		79.2251	132.67
463.529			79.8813	142.158
322.274			179.078	226.936
817.803	259.818		91.5442	144.433
1113.57	249.912		115.21	170.322
599.293	203.904		99.3071	171.276
245.019			100.901	139.846
290.274	51.0379		118.76	184.999
501.019			97.8756	122.449
895.058	103.592		103.428	192.765
610.274	145.378		179.461	231.909
450.274	1.60562e+07		189.655	221.852
972.313	184.915		111.783	222.585
			100.504	149.968												#REF!
			127.858	184.999												#REF!
			145.031	205.848												#REF!
			100.587	160.468												#REF!
			91.1924	145.557												#REF!
			78.6532	128.932												#REF!
			94.8522	145.557												#REF!
			157.76	239.514												#REF!
				201.851												#REF!
																#REF!
																#REF!
																#REF!
																#REF!
																#REF!
																#REF!
																#REF!
																#REF!
																#REF!
																#REF!
																#REF!
																#REF!
																#REF!
																#REF!
																#REF!
																#REF!
																#REF!
																#REF!
																#REF!
																#REF!
																#REF!
																#REF!
																#REF!
																#REF!
																#REF!
																#REF!
																#REF!
																#REF!
																#REF!
																#REF!
																#REF!
																#REF!
																#REF!
																#REF!
																#REF!
																#REF!
																#REF!
																#REF!
																#REF!
																#REF!
																#REF!
																#REF!
																#REF!
																#REF!
																#REF!
																#REF!
																#REF!
																#REF!
																#REF!
																#REF!
																#REF!
																#REF!
																#REF!
																#REF!
																#REF!

## Sheet: Dataset 3
Filamentous length	Filamentous persistence length	Small filamentous length	Large spherical ELM radius	Large spherical equivalent radius	Small spherical radius	Unknown equivalent radius	Rod length	Rod diameter
567.293	269.264	231.765		98.8862	112.748	105.272	690.9	145.635
154.51		122.51	117.771	174.107	95.5331	250.164	406.034	196.606
444.784	2690.82	154.51	158.268	237.464	100.521	270.209	730.541	107.755
1100.31	72.4738	109.255	140.503	214.38	102.129	139.846	425.699	125.552
514.274	248.973	186.51	70.9927	118.388	93.8117	335.825	1079.39	113.931
439.293	1044.07	237.255	57.5677	95.5331	90.2703	325.474	562.44	152.283
501.019	3639.9	186.51	148.452	219.637	92.058	131.436	720.343	146.85
700.784	1427.35	218.51	123.28	184.999	117.004	111.293	820.644	95.0473
367.529	23.4363	141.255	102.691	152.126	97.2241	174.107	452.462	154.049
767.058	23178.7	231.765	87.2238	131.436	93.8117	142.158	819.229	135.876
199.765		277.019	105.749	171.276	93.8117	157.392	570.608	148.896
693.019	346.483	295.764	115.068	172.225	111.293	181.441	859.099	127.271
578.274	106.701	309.019	100.907	146.672	136.305	127.662	351.143	153.319
759.293	632.267	245.019	128.116	208.21	103.713	151.051	623.064	124.519
463.529	61.1174	45.2548		121.11	108.324	166.45	471.677	133.945
1222.82	290.414	277.019	150.306	257.864	92.058	118.388	82.2546	194.132
785.803	36.7745	186.51	101.196	161.48	108.324	145.557
1132.31	782.211	668.784	116.773	182.337	97.2241	247.545
721.803	30.8831	199.765	88.384	132.67	92.058	123.772
991.058	131.216	231.765	107.062	166.45	98.8862	242.221
231.765		373.019	72.2412	121.11	92.058	155.307
527.529	614.665	263.765	73.8967	119.757	98.8862	450.99
501.019	122.389	309.019	125.393	185.878	100.521	119.757
301.255	144.723	192	85.3054	125.082	97.2241	234.703
789.019	248.291	186.51	139.608	206.638	95.5331	189.353
186.51		263.764	79.6831	133.893	97.2241	160.468
972.313	957.456	346.51	144.732	227.653	108.324	303.179
876.313	1242.55	109.255	76.2311	137.496	112.748	158.424
1124.55	830.927	186.51	110.682	170.322	90.2703	283.742
650.039	67.584	186.51	92.3126	152.126	103.713	331.92
831.058	206.35	64	108.12	167.427	106.809	136.305
282.51	76.0765	135.764	150.108	226.217	103.713	184.999
610.274	36.0859	109.255	113.72	218.148	109.819	451.713
405.019	5986.45	96	185.966	240.194	95.5331	183.229
546.274	344.268	218.51	99.478	175.041	106.809	216.649
109.255		122.51	62.2655	108.324	97.2241	203.459
2184.16	74.7656	32	77.2858	122.449	92.058	306.388
1115.84	168.923	437.019	322.834	103.713	90.2703	236.777
1505.33	3306.37	141.255	86.5049	135.104	100.521	151.051
823.293	505.382	109.255	116.947	179.636	100.521	318.898
463.529	160.215	109.255	115.361	175.969	90.2703	199.414
186.51		263.764	89.9752	141.007	98.8862	169.362
1228.31	1018.7	263.765	37.6591	184.116	95.5331	201.042
213.019		199.764	101.013	163.487	95.5331	304.253
484.548	174.213	77.2548	96.2406	147.779	112.748	175.969
519.765	4661.18	245.019	78.9926	123.772	97.2241	114.184
154.51		96	160.2	235.396	98.8862	147.779
186.51		231.765	128.932	204.258	109.819	127.662
373.019	39.2812	96	72.294	118.388	97.2241	221.852
682.039	146.118	109.255	91.0769	141.007	95.5331	218.148
623.529	519.012		107.874	162.487	98.8862	327.968
301.255	63.4541		32893.9	112.748	106.809	203.459
327.764	17.9684		97.0236	148.878	97.2241	186.753
322.274				137.496	117.004	226.936
1328.86	409.551		75.5745	133.893	97.2241	221.116
831.058	174.795		85.1387	181.441	90.2703	174.107
205.255			101.944	163.487	108.324	271.412
908.313	98.4521		130.057	189.353	100.521	168.397
122.51			132.519	196.947	93.8117	167.427
621.255	260.806		58.163	95.5331	92.058	382.559
663.293	50246.3		157.932	234.703	98.8862	188.49
277.019			80.1945	137.496	97.2241	213.619
1190.82	711.55			93.8117	102.129	114.184
263.765			44.4028	187.623	111.293	162.487
181.019			95.8677	138.676	105.272	250.164
327.764			79.5463	128.932	103.713	319.409
636.784	116.103		102.849	144.433	109.819	93.8117
341.019	41.1079		144.02	215.895	90.2703	184.116
495.529	153.601		131.823	203.459	90.2703	167.427
1115.84	690.11		170.719	242.893	117.004	265.34
767.058	4176.28		91.7411	139.846	90.2703	186.753
482.274	69.109		151.133	230.499	92.058	122.449
245.019			162.289	253.401	92.058	137.496
735.058	117.568		108.578	172.225	97.2241	166.45
1098.04	379.077		141.4	213.619	95.5331	238.149
386.274	17.1836		163.345	259.753	93.8117	288.3
1836.31	73.6236		148.464	228.368	103.713	297.755
309.019			141.568	228.368	95.5331	325.474
354.274	2934.56		91.4631	136.305	90.2703	285.46
759.293	138.546		84.4571	184.116	95.5331	270.811
1036.31	760.441		173.779	267.176	92.058	279.109
269.255			84.8981	154.254	90.2703	361.532
927.058	39.8262		133.329	205.848	90.2703	106.809
1041.8	3735.4		123.538	194.448	98.8862	184.116
213.019	215.635		134.577	209.769		300.48
1105.8	108.721		65.4498	108.324		359.725
167.764			67.0519	117.004		385.952
1126.82	55.5475		75.6599	132.67		135.104
1386.04	438.596		79.8021	126.378		111.293
391.765	8.93165		85.7497	136.305		118.388
448	28.4103		165.019	243.563		109.819
386.274	22.4973		71.9135	127.662		165.468
391.764	64.034		66.4382	119.757		234.007
748.313	1624.75		190.844	276.174		202.656
895.058	569.779		111.716	196.947		128.932
959.058	1402.96		117.169	202.656		261.628
1627.84	144.299		125.337	184.116		267.785
684.313	85.2631		108.592	164.48		215.895
399.529	35426.2			95.5331		316.848
849.803	156.898			186.753		125.082
109.255			75.2486	126.378		265.953
458.039	143.821		68.2078	119.757		512.239
676.548	99.3296		171.843	263.49		296.109
405.019	268.548		76.2056	123.772		106.809
1062.82	12700		117.042	175.969		270.209
346.51	7.54735		107.369	177.812		126.378
1068.31	359.621		89.2783	144.433		152.126
1260.31	22.8939		122.016	193.608		184.116
796.784	726.485		186.583	256.596		283.742
759.293	954.617		81.8807	130.19		270.811
1140.08	2288.44		108.353	173.169		342.076
418.274			139.139	216.649		132.67
860.784	102.064		149.592	218.894		122.449
586.039	13.825		145.459	208.21		259.753
469.019	276.718		83.5665	119.757		208.21
386.274	344.225		128.019	194.448		217.4
623.529	319.805		159.515	223.316		152.126
277.019			172.242	270.209		310.089
1172.08	1919.12		125.498	187.623		268.393
1422.59	223.871		152.476	219.637		158.424
1968.86	150.136		62.5201	108.324		254.043
780.313	90.8475		93.5544	168.397		98.8862
399.529	17.3717		107.001	181.441		406.517
567.293	2028.76		171.626	254.043		226.217
490.039	3492.82		65.7755	122.449		181.441
506.51	196.302		79.8854	132.67		211.317
802.274	288.678			92.058		259.125
295.765	448.361		103.422	173.169		106.809
852.077	33.0129		104.197	162.487		163.487
1009.8	326174		65.9641	108.324		328.465
932.548	244.915		132.247	191.917		206.638
373.019	80.3218		105.923	191.066		98.8862
341.019			142.498	232.61		218.894
1321.1	780.989		143.736	205.848		220.378
540.784	477.575		100.769	146.672		381.279
1676.31	80.4719		76.9955	192.765		300.48
426.039	766.902		119.268	202.656		312.184
1505.33	368.442		130.334	215.895		175.969
450.274	25.2772		55.4816	114.184		224.771
410.51	115.145		76.9117	136.305		321.444
831.058	126.149			114.184		90.2703
759.293	135.986		81.6371	125.082		215.895
295.764			120.192	187.623		301.021
578.274	2570.95		121.263	199.414		218.148
490.039	408.022		111.583	170.322		132.67
540.784	531.678		177.228	295.006		185.878
1727.06	978.501		119.383	190.211		455.306
1161.1	68.3386		117.711	181.441		103.713
732.784	374.054		171.981	267.785		317.362
167.765	36.4444		124.309	199.414		148.878
1611.37	882.402		77.4521	117.004		388.896
1177.57	978.093		88.2188	147.779		222.585
1105.8	176.878			208.991		295.006
109.255				170.322		354.706
817.803	121.74		79.4286	123.772		211.317
844.313	3719.82		177.501	284.888		388.477
167.764			77.2199	114.184		1008.45
884.077	3878.34		97.9707	163.487		201.042
135.764			64.4715	121.11		122.449
122.51				95.5331		203.459
1055.06	38.9413		80.7144	128.932		302.102
373.019	577.311		112.458	175.969		190.211
759.293	176.927		11.7872	147.779		395.957
490.039	31.0509		94.9433	154.254		378.705
540.784	334.785		98.9556	167.427		181.441
879.529	1044.86		128.782	190.211		115.602
109.255			136.361	229.08		161.48
855.293	33.2089		96.3274	160.468		299.393
418.274	68.7285		117.979	225.495		340.165
565.019	55.873			245.562		212.854
341.019	955.164			160.468		294.453
1028.55	255.719		116.211	190.211		367.346
748.313	662.917		111.502	195.285		342.552
290.274			149.862	233.31		212.087
256	16.3647		119.584	178.726		343.027
303.529			195.02	303.179		133.893
844.313	407.257		88.1224	142.158		214.38
567.293	85.8514		79.8728	139.846		385.952
231.765			204.64	289.429		117.004
1630.12	60.2201		78.7541	137.496		184.116
482.274	24.7418		91.6254	143.3		315.817
836.548	50.5935		66.8863	103.713		449.905
1119.06	1854.38		73.641	123.772		448.817
399.529	34.0182		73.1517	122.449		208.21
303.529			111.472	214.38		225.495
572.784	156.828		88.2176	158.424		500.98
572.784	40.2095		125.118	194.448		364.674
1869.65	408.979		153.573	228.368		594.415
1158.82	2131.85		72.9325	119.757		156.353
516.548	48617.7		91.3935	151.051		386.374
895.058	67.1221		103.061	163.487		291.113
1638.82	119.565		73.8896	118.388		240.194
469.019	647.411		155.337	241.547		132.67
655.529	1606.02		62.4484	111.293		319.409
1220.55	479.788			166.45		355.165
716.313	874.551		68.4064	108.324		321.95
1601.33	1816.99		88.5248	152.126		156.353
1094.82	205.734		119.103	186.753		211.317
431.529	1846.42			112.748		208.21
416	200.13		128.383	196.947		216.649
213.019			146.001	216.649		303.716
245.019			79.559	115.602		228.368
591.529	8.36842		158.476	234.007		214.38
476.784	30997.4		157.275	236.088		121.11
671.058	182.194		144.015	221.116		270.811
277.019	11958.4		104.053	164.48		135.104
751.529	621.737		80.3436	141.007		316.848
2025.1	86.8683		168.959	249.512		252.757
314.51	24.2819		173.484	269.605		315.817
1126.82	100.857		103.154	173.169		362.882
154.51			138.655	212.854		208.21
642.274	149.856		160.202	270.209		254.043
740.548	625.586		141.816	213.619		196.947
290.274	76.6898		101.55	157.392		317.362
277.019			137.396	226.936		287.168
559.529	33.7828			159.449		177.812
263.765			121.596	203.459		144.433
663.293	66.131		160.135	256.596		164.48
703.058	8726.98		164.767	260.379		252.757
96			78.2636	132.67		335.339
192			112.227	169.362		386.795
1805.65	206.295		160.145	249.512		299.393
1999.92	67.7525		63.1924	111.293		90.2703
895.058	52.38		164.745	229.791		136.305
154.51			113.245	198.595		280.855
586.039	363.094		71.7776	137.496		277.939
109.255			119.549	170.322		176.893
1450.04	754.747		119.906	195.285		177.812
463.529	11103.2		74.8868	130.19		381.706
631.293	498.187			90.2703		336.31
154.51			149.919	215.895		137.496
213.019			92.6157	151.051		402.488
431.529	153.755		73.4357	170.322		361.532
1339.84	64.7655		107.926	168.397		236.088
927.058	12.3862		98.4161	153.194		299.393
482.274	516.925		165.928	240.194		297.207
122.51				240.194		105.272
661.019	186.633		83.7914	149.968		171.276
96	45.367		96.7318	132.67		156.353
346.51	406.806		106.794	159.449		355.624
580.548	16931.6			95.5331		350.547
1002.04	71.2375		115.341	217.4		353.325
527.529	88.2497		93.0716	157.392		103.713
1066.04	372.605		163.408	281.435		159.449
700.784	243.048		132.288	212.854		153.194
1614.59	278.378		11.6671	109.819		307.979
1366.35	346.658		138.483	207.425		202.656
1808.86	90.0807		96.8923	158.424		385.952
444.784	240.589		124.72	179.636		151.051
167.765			192.322	284.888		209.769
2551.68	723.823			93.8117		170.322
290.274			102.308	149.968		214.38
250.51	400.727		126.744	231.205		215.895
791.293	424.029			143.3		343.027
842.039	449.648		136.837	226.217		227.653
450.274	86.417		173.388	276.174		240.871
458.039	294.627		84.8346	123.772		423.79
333.255	46.4127		111.278	169.362		279.109
732.784	231.542		115.932	174.107		191.917
1004.31	97.8114		92.0046	146.672		130.19
580.548	3422.22		71.009	108.324		278.525
586.039	186.061		118.49	168.397		446.998
1289.1	75.2407			93.8117		168.397
1286.82	58.9353		86.5391	133.893		273.803
367.529	7.82489			97.2241		360.63
703.058	910.246		98.2132	163.487		244.897
668.784	54.4438		96.8212	157.392		240.871
610.274	910.014		83.5275	128.932		125.082
911.529	932.832		84.7786	137.496		312.706
2035.14	968.08		74.448	118.388		280.274
540.784	72.6284		85.9247	154.254		159.449
759.293	10530.8		81.3445	133.893		286.03
895.058	58.1714		75.9388	118.388		301.021
1121.33	148.666		88.6038	139.846		159.449
759.293	171.303		102.304	156.353		119.757
314.51	214.54		101.34	186.753		231.205
245.019	6924.83		121.741	184.999		126.378
687.529	799.119		65.2618	121.11		118.388
386.274	173.298			93.8117		206.638
1424.86	511.377		138.538	221.116		139.846
277.019			11.2938	267.785		108.324
463.529	239.044		94.5977	149.968		318.898
540.784	128649		88.3509	145.557		175.041
586.039	396.757		128.432	208.991		125.082
450.274	23.8621			95.5331		161.48
418.274	502.692		66.615	121.11		148.878
514.274	35.2568		72.665	123.772		410.904
309.019			105.879	163.487		307.979
405.019			92.9912	146.672		215.139
916.077	980.654		86.9397	143.3		197.772
1433.57	2099.62		65.8092	114.184		125.082
759.293	3513.95		82.225	155.307		196.117
295.764	48.8456		143.733	214.38		102.129
1705.1	91.1768		142.42	196.117		404.91
895.058	48.211		96.3797	153.194		204.258
881.803	344.588		97.8728	157.392		97.2241
341.019	398.18		106.341	166.45		185.878
476.784	54.7718		93.0773	142.158		153.194
522.039	253.07		92.3004	145.557		141.007
380.784	197.533		169.138	238.833		108.324
341.019	428.535		101.391	154.254		108.324
1121.33	6090.87		163.385	250.164		152.126
1785.57	345.519		69.1861	126.378		227.653
333.255	44.756		107.788	164.48		301.021
431.529	1389.8		148.524	254.684		293.899
231.764			90.0979	145.557		365.121
490.039	54.2094		105.855	145.557		353.325
399.529	107.126		101.744	145.557		244.231
186.51			102.864	170.322		175.969
431.529	77.8148			90.2703		219.637
1715.14	52.3899		77.361	115.602		168.397
322.274	425.744		81.5028	123.772		198.595
1087.06	303.957		148.275	212.854		139.846
90.5097	40.4378		108.657	154.254		141.007
213.019			125.262	192.765		130.19
625.803	308.497		140.607	227.653		143.3
322.274			70.6265	112.748		208.21
3199.45	95.4257		126.324	183.229		143.3
418.274	392.189		98.7272	158.424		111.293
964.548	9458.55		180.577	240.871		98.8862
346.51	35329		64.5648	118.388		117.004
844.313	497060		128.002	191.066		190.211
354.274	177.992		107.659	172.225		226.217
341.019			98.843	151.051		126.378
367.529	311.155		95.739	146.672		286.599
314.51	51.6677		128.859	188.49		248.858
495.529	179.674		74.0463	122.449		118.388
399.529	45.693		162.692	242.221		175.041
405.019	34.8895		101.596	152.126		103.713
655.529	352.75		122.031	177.812		493.771
167.765			81.422	128.932		215.139
482.274	23.2723			125.082		192.765
695.293	583.924		105.043	152.126		254.684
1217.33	35.4628		83.2707	141.007		310.614
367.529	782.204		75.8916	132.67		250.164
450.274			76.8201	154.254		169.362
527.529	376.537			105.272		201.042
444.784	17.0631		130.821	188.49		185.878
615.765	110.743		71.9785	119.757		189.353
996.548	9079.08		115.463	164.48		132.67
380.784	388.731		92.1206	136.305		268.393
412.784	99.6982		16.4999	123.772		228.368
687.529	610.219		144.667	212.854		102.129
1345.33	434.841		146.784	212.087		169.362
572.784	265.876		104.785	151.051		100.521
586.039	59.7944		97.6647	172.225		212.087
953.568	643.951		100.197	159.449		204.258
322.274	484.095		115.963	171.276		92.058
892.784	54.7641		134.509	194.448		190.211
341.019	83.8666		87.0837	137.496		184.116
572.784	646536		103.832	166.45		426.091
583.764	387.849		106.322	165.468		179.636
476.784	35.5157		128.561	259.125		183.229
535.293	79084		68.9402	126.378		188.49
514.274	761.696		139.479	219.637		196.947
985.568	115.771		121.297	177.812		610.11
650.039	256.732		134.614	193.608		126.378
652.313	790.198		66.1282	130.19		178.726
708.548	1005.86		100.708	156.353		93.8117
2243.61	38.5278		75.6852	117.004		212.854
934.822	84.5254		122.584	191.917		820.815
335.529	459.825		107.415	156.353		192.765
1449.1	64.4307		76.8514	131.436		117.004
631.293	278.488		111.235	162.487		103.713
231.765				103.713		164.48
250.51			184.758	255.961		189.353
540.784	132.482		157.675	235.396		136.305
508.784	89.2207		112.204	185.878		95.5331
1659.84	18.2794		85.2071	153.194		172.225
1528.63	2699.89		88.0292	141.007		98.8862
277.019	111.345		138.737	209.769
380.784	180.761		78.8844	121.11
258.274	159.267		90.739	133.893
863.058	70.098		132.202	191.917
618.039	228.788		95.707	141.007
732.784	9269.44		99.4378	169.362
540.784	208.002		103.991	171.276
572.784	90.6812		77.1265	122.449
186.51			123.392	214.38
639.058	1185.39		62.8809	95.5331
522.039	152.759		113.683	163.487
373.019			57.189	97.2241
1518.59	825.017		102.595	159.449
397.255	152.565		134.427	187.623
554.039	57.5812		137.81	198.595
610.274	73.6994		146.853	227.653
961.332	335.725		112.27	182.337
889.568	271.836		105.863	155.307
767.058	113.893		89.6611	132.67
825.568	602.68		84.1151	135.104
378.51	148.424		95.6547	157.392
650.039	894.815		98.4158	147.779
1577.1	128.229		170.781	270.811
604.784	621.765		90.4893	127.662
322.274	123.701		138.341	201.851
269.255			155.801	245.562
554.039	460.088		54.1569	191.066
341.019	82.1524		92.1809	148.878
309.019	26.3171		116.52	183.229
1134.59	216.81		135.104	185.878
213.019			79.5417	126.378
282.51			70.5509	119.757
1568.39	94.2322		103.38	151.051
			113.498	161.48											#REF!
			72.2292	122.449											#REF!
			116.773	162.487											#REF!
			165.072	220.378											#REF!
			98.7355	159.449											#REF!
			125.087	190.211											#REF!
			91.3075	136.305											#REF!
			72.0006	117.004											#REF!
			89.5837	141.007											#REF!
			93.5956	141.007											#REF!
															#REF!
															#REF!
															#REF!
															#REF!
															#REF!
															#REF!
															#REF!
															#REF!
															#REF!
															#REF!
															#REF!
															#REF!
															#REF!
															#REF!
															#REF!
															#REF!
															#REF!
															#REF!
															#REF!
															#REF!
															#REF!
															#REF!
															#REF!
															#REF!
															#REF!
															#REF!
															#REF!
															#REF!
															#REF!
															#REF!
															#REF!
															#REF!
															#REF!
															#REF!
															#REF!
															#REF!
															#REF!
															#REF!
															#REF!
															#REF!
															#REF!
															#REF!
															#REF!
															#REF!
															#REF!
															#REF!
															#REF!
															#REF!
															#REF!
															#REF!
															#REF!
															#REF!
															#REF!
															#REF!
															#REF!
															#REF!
															#REF!
															#REF!
															#REF!
															#REF!
															#REF!
															#REF!
															#REF!
															#REF!
															#REF!
															#REF!
															#REF!
															#REF!
															#REF!
															#REF!
															#REF!
															#REF!
															#REF!
															#REF!
															#REF!
															#REF!
															#REF!
															#REF!
															#REF!
															#REF!
															#REF!
															#REF!
															#REF!
															#REF!
															#REF!
															#REF!
															#REF!
															#REF!
															#REF!
															#REF!
															#REF!
															#REF!
															#REF!
															#REF!
															#REF!
															#REF!
															#REF!
															#REF!
															#REF!
															#REF!
															#REF!
															#REF!
															#REF!
															#REF!
															#REF!
															#REF!
															#REF!
															#REF!
															#REF!
															#REF!
															#REF!
															#REF!
															#REF!
															#REF!
															#REF!
															#REF!
															#REF!
															#REF!
															#REF!
															#REF!
															#REF!
															#REF!
															#REF!
															#REF!
															#REF!
															#REF!
															#REF!
															#REF!
															#REF!
															#REF!
															#REF!
															#REF!
															#REF!
															#REF!
															#REF!
															#REF!
															#REF!
															#REF!
															#REF!
															#REF!
															#REF!
															#REF!
															#REF!
															#REF!
															#REF!
															#REF!
															#REF!
															#REF!
															#REF!
															#REF!
															#REF!
															#REF!
															#REF!
															#REF!
															#REF!
															#REF!
															#REF!
															#REF!
															#REF!
															#REF!
															#REF!
															#REF!
															#REF!
															#REF!
															#REF!
															#REF!
															#REF!
															#REF!
															#REF!
															#REF!
															#REF!
															#REF!
															#REF!
															#REF!
															#REF!
															#REF!
															#REF!
															#REF!
															#REF!
															#REF!
															#REF!
															#REF!
															#REF!
															#REF!
															#REF!
															#REF!
															#REF!
															#REF!
															#REF!
															#REF!
															#REF!
															#REF!
															#REF!
															#REF!
															#REF!
															#REF!
															#REF!
															#REF!
															#REF!
															#REF!
															#REF!
															#REF!
															#REF!
															#REF!
															#REF!
															#REF!
															#REF!
															#REF!
															#REF!
															#REF!
															#REF!
															#REF!
															#REF!
															#REF!
															#REF!
															#REF!
															#REF!
															#REF!
															#REF!
															#REF!
															#REF!
															#REF!
															#REF!
															#REF!
															#REF!
															#REF!
															#REF!
															#REF!
															#REF!
															#REF!
															#REF!
															#REF!
															#REF!
															#REF!
															#REF!
															#REF!
															#REF!
															#REF!
															#REF!
															#REF!
															#REF!
															#REF!
															#REF!
															#REF!
															#REF!
															#REF!
															#REF!
															#REF!
															#REF!
															#REF!
															#REF!
															#REF!
															#REF!
															#REF!
															#REF!
															#REF!
															#REF!
															#REF!
															#REF!
															#REF!
															#REF!
															#REF!
															#REF!
															#REF!
															#REF!
															#REF!
															#REF!
															#REF!
															#REF!
															#REF!
															#REF!
															#REF!
															#REF!
															#REF!
															#REF!
															#REF!
															#REF!
															#REF!
															#REF!
															#REF!
															#REF!
															#REF!
															#REF!
															#REF!
															#REF!
															#REF!
															#REF!
															#REF!
															#REF!
															#REF!
															#REF!
															#REF!
															#REF!
															#REF!
															#REF!
															#REF!
															#REF!
															#REF!
															#REF!
															#REF!
															#REF!
															#REF!
															#REF!
															#REF!
															#REF!
															#REF!
															#REF!
															#REF!
															#REF!
															#REF!
															#REF!
															#REF!
															#REF!
															#REF!
															#REF!
															#REF!
															#REF!
															#REF!
															#REF!
															#REF!
															#REF!
															#REF!
															#REF!
															#REF!
															#REF!
															#REF!
															#REF!
															#REF!
															#REF!
															#REF!
															#REF!
															#REF!
															#REF!
															#REF!
															#REF!
															#REF!
															#REF!
															#REF!
															#REF!
															#REF!
															#REF!
															#REF!
															#REF!
															#REF!
															#REF!
															#REF!
															#REF!
															#REF!
															#REF!
															#REF!
															#REF!
															#REF!
															#REF!
															#REF!
															#REF!
															#REF!
															#REF!
															#REF!
															#REF!
															#REF!
															#REF!
															#REF!
															#REF!
															#REF!
															#REF!
															#REF!
															#REF!
															#REF!
															#REF!
															#REF!
															#REF!
															#REF!
															#REF!
															#REF!
															#REF!
															#REF!
															#REF!
															#REF!
															#REF!
															#REF!
															#REF!
															#REF!
															#REF!
															#REF!
															#REF!
															#REF!
															#REF!
															#REF!
															#REF!
															#REF!
															#REF!
															#REF!
															#REF!
															#REF!
															#REF!
															#REF!
															#REF!
															#REF!
															#REF!
															#REF!
															#REF!
															#REF!
															#REF!

## Sheet: Dataset 4
Filamentous length	Filamentous persistence length	Small filamentous length	Large spherical ELM radius	Large spherical equivalent radius	Small spherical radius	Unknown equivalent radius	Rod length	Rod diameter
863.058	184.996	314.51	86.9548	144.433	92.058	123.772	875.998	134.39
218.51		154.51	65.6621	103.713	90.2703	293.344	376.795	170.113
932.548	33.7474	309.019	125.701	209.769	108.324	190.211	360.08	131.089
921.568	20.3949	245.019	112.06	163.487	102.129	328.961	375.156	133.855
959.058	4257.53	295.764	110.86	172.225	90.2703	158.424	653.214	131.044
753.803	451.464	250.51	118.586	182.337	90.2703	306.919	304.698	184.19
764.784	237.893	173.255	123.437	191.066	90.2703	151.051	656.764	173.291
887.293	246.409	205.255	151.308	209.769	102.129	163.487	949.796	166.254
277.019		245.019		112.748	92.058	193.608	198.713	162.483
503.293	26.4319	250.51	67.7172	123.772	92.058	261.628	685.449	128.372
855.293	30.1487	154.51	130.105	205.055	97.2241	103.713	711.589	162.98
874.039	111.365	250.51	86.852	126.378	100.521	304.253	939.504	134.896
804.548	50.2364	141.255		121.11	93.8117	90.2703	450.601	185.712
554.039	2.07724e+06	245.019	82.3822	133.893	98.8862	123.772	719.529	124.232
1211.84	75.1312	173.255	101.849	152.126	108.324	267.176	1003.27	130.298
213.019		263.765	182.025	244.897	90.2703	277.352	578.287	174.738
889.568	130.732	295.764	72.194	108.324	90.2703	128.932	516.245	133.054
1100.31	229.892	45.2548	91.5897	126.378	100.521	161.48	749.707	151.878
567.293	104336	186.51	135.453	193.608	93.8117	208.991	489.664	178.009
1083.84	27.3271	186.51	159.937	233.31	90.2703	469.058
341.019	16.2108	173.255	67.4122	108.324	90.2703	136.305
567.293	578.49	186.51	66.5695	114.184	97.2241	142.158
335.529	13.9791	250.51	67.9925	117.004	100.521	156.353
237.255		226.274	86.6883	141.007	92.058	537.393
1222.82	183.804	186.51	108.12	151.051	98.8862	411.3
490.039	103.037	277.019	61.6104	105.272	92.058	135.104
1183.06	175.89	263.764	131.009	209.769	95.5331	366.013
636.784	78.8279	186.51	86.8274	138.676	98.8862	220.378
476.784		109.255		125.082	97.2241	294.453
135.764		263.765	85.8342	143.3	103.713	112.748
181.019		173.255	93.0635	143.3	90.2703	245.562
322.274		277.019	56.2078	93.8117	93.8117	204.258
295.765		141.255	124.726	231.205	100.521	109.819
874.039	153.826	322.274	149.21	215.139	93.8117	105.272
1108.08	37.9576	348.784	192.573	297.207	103.713	98.8862
1017.57	240.214	263.764	160.122	228.368	95.5331	146.672
412.784	800.738	109.255	91.9082	138.676	98.8862	248.202
881.803	336.453	186.51	77.6219	135.104	108.324	121.11
1036.31	60.4717	122.51	138.366	212.854	103.713	115.602
346.51		258.274	71.8227	114.184	97.2241	287.168
354.274	13.4909	218.51	96.1477	170.322	95.5331	193.608
250.51		341.019	112.811	186.753	90.2703	292.788
1305.57	71.8258	263.765	112.254	163.487	97.2241	283.167
772.548	1115.78	231.765	106.394	159.449	92.058	209.769
732.784	261.249	295.765	84.9921	137.496	95.5331	277.352
631.293	4279.92	160		108.324	97.2241	425.709
1126.82	869.49	354.274	88.5208	144.433	100.521	133.893
354.274		476.784	123.055	179.636	102.129	136.305
167.765		167.765	60.3786	102.129	95.5331	413.671
391.764	486.318	282.51	85.1552	146.672	93.8117	212.854
1233.8	1017.69	199.765	101.642	154.254	105.272	256.596
373.019	171.108	231.765	117.313	168.397	93.8117	344.922
746.039	84.3218	437.019	74.5144	117.004	93.8117	114.184
258.274		199.765	179.212	272.012	93.8117	97.2241
759.293	61.6459	186.51	115.132	155.307	90.2703	273.803
199.765		199.765	108.764	163.487	90.2703	351.011
1113.57	131.386	405.019	140.155	203.459	95.5331	202.656
527.529	2000.88	237.255	139.407	200.229	103.713	145.557
367.529	35.1474	167.765	90.2101	156.353	97.2241	262.25
1076.08	127.204	263.765	142.425	201.851	92.058	215.139
644.548	180.517	192	76.3383	125.082	92.058	453.153
173.255		231.765	69.6928	112.748	93.8117	181.441
1209.57	975.897	160	111.118	155.307	92.058	168.397
359.764	57.0493	341.019	107.194	157.392	97.2241	230.499
237.255		186.51	179.504	272.61	95.5331	191.066
1121.33	427.863	154.51	91.6521	157.392	90.2703	148.878
996.548	650.298	269.255	355.455	141.007	97.2241	178.726
1079.29	100.035	186.51		142.158	92.058	532.824
817.803	12.6	205.255	171.433	254.684	106.809	153.194
676.548	701.835	295.764	99.5528	144.433	92.058	143.3
122.51		173.255	148.762	225.495	92.058	218.894
309.019		218.51	156.988	214.38	93.8117	496.733
849.803	740.557	192	105.02	161.48	114.184	252.111
1505.33	564.7	295.764	123.593	179.636	103.713	273.803
458.039	1227.93	341.019	154.177	266.565	111.293	95.5331
309.019		263.764	107.883	175.969	98.8862	307.45
135.764		199.765	151.39	241.547	92.058	288.3
1070.59	74.7553	282.51	104.347	161.48	115.602	148.878
1462.35	262.648	160	156.395	229.791	93.8117	354.246
167.764		263.765	87.2429	136.305	100.521	320.936
687.529	172.077	282.51	163.594	225.495	92.058	248.202
540.784	769.237	213.019	84.3996	137.496	102.129	158.424
250.51		218.51	134.541	183.229	93.8117	218.894
623.529	1681.12	263.764	113.828	194.448	90.2703	168.397
167.765		154.51	153.413	210.545	90.2703	139.846
346.51	193.731	250.51	85.3112	135.104	98.8862	127.662
205.255		231.765	169.738	244.231	95.5331	242.893
828.784	20.3482	359.764	125.416	184.999	90.2703	189.353
1092.55	2168.48	64	134.343	214.38	92.058	141.007
527.529	144.711	218.51	109.997	155.307	95.5331	330.444
167.764		218.51	68.4183	102.129	92.058	244.231
604.784	848.641	186.51	15.6753	109.819	100.521	106.809
583.765	91.8003	218.51		98.8862	93.8117	98.8862
999.764	24.9857	186.51	92.6105	144.433	93.8117	118.388
141.255		218.51	116.787	175.041	93.8117	130.19
1257.1	89.905	250.51	74.2265	136.305	93.8117	289.429
458.039	574.589	250.51	66.8677	105.272	92.058	355.165
290.274	881.951	418.274	135.108	216.649	90.2703	118.388
849.803	141.552	205.255	112.811	162.487	102.129	180.541
109.255		199.765	123.359	186.753	90.2703	201.042
463.529		199.765	176.745	236.777	100.521	170.322
508.784	43.2639	205.255	146.867	224.045	102.129	130.19
90.5097	346.483	237.255	115.781	182.337	93.8117	204.258
695.293	154.958	231.764	82.2861	131.436	97.2241	391.819
1444.55	90.7224	231.765	115.808	162.487	108.324	178.726
586.039	198.602	186.51	80.4858	127.662	95.5331	139.846
1420.31	609.158	173.255	109.243	168.397	92.058	210.545
141.255		231.765	106.084	181.441	92.058	283.167
231.764	18.6037	154.51	153.068	221.852	100.521	135.104
346.51	322.004	199.764	70.5837	126.378	90.2703	137.496
874.039	53.1298	231.765	114.885	182.337	92.058	92.058
141.255		199.765	106.007	183.229	92.058	288.865
527.529	71.9472	309.019	126.526	199.414	90.2703	165.468
154.51		309.019	84.7751	143.3	106.809	466.969
655.529	916.591	154.51	135.458	196.117	92.058	106.809
554.039	976.47	263.765	129.643	201.851	92.058	397.189
1030.82	52.2076	154.51	135.5	193.608	92.058	218.148
199.765		218.51	127.114	194.448	90.2703	195.285
471.293	128.445	250.51	112.131	154.254	98.8862	172.225
1185.33	551.244	154.51	108.801	155.307	92.058	274.991
90.5097	543.682	250.51	91.4899	138.676	93.8117	174.107
380.784	165.151	109.255	80.7413	119.757	100.521	168.397
199.764		154.51	79.5119	121.11	93.8117	223.316
437.019		263.765	114.298	164.48	97.2241	108.324
687.529	285.186	301.255	127.804	196.117	105.272	257.231
625.803	90.2684	64	88.0598	146.672	98.8862	109.819
714.039	93.8405	160	177.848	249.512	103.713	299.937
282.51		135.764	78.4487	121.11	93.8117	151.051
1025.33	510.08	290.274	67.0246	123.772	90.2703	175.041
1207.29	173.704	245.019	88.6513	135.104	100.521	351.011
412.784	62.3106	167.765	68.5484	112.748	95.5331	273.803
753.803	8464.25	122.51	142.533	199.414	93.8117	200.229
1358.59	858.148	263.764	89.7476	131.436	100.521	117.004
367.529	471.789	192	98.1362	159.449	98.8862	130.19
1083.84	853.78	282.51	153.438	219.637	90.2703	316.333
437.019	37.1003	109.255	149.14	208.991	112.748	445.537
303.529	13.1664	277.019	123.716	190.211	90.2703	180.541
186.51		205.255	161.338	240.871	93.8117	141.007
1505.33	609.594	128	170.151	255.961	103.713	184.999
309.019		269.255	127.18	208.21	90.2703	242.221
277.019		269.255	130.963	182.337	97.2241	100.521
476.784	15.4992	109.255	114.421	169.362	90.2703	157.392
367.529	35.149	173.255	79.6727	121.11	90.2703	213.619
1422.59	838.55	128	115.915	167.427	97.2241	185.878
309.019		32		103.713	100.521	272.012
676.548	40741.4	231.765	138.94	184.999	95.5331	137.496
876.313	176.22	231.765	126.545	216.649	92.058	196.947
122.51		109.255	82.0295	135.104	112.748	184.116
1409.33	169.234	282.51	117.309	190.211	92.058	133.893
450.274	32.8007	213.019	93.4079	143.3	93.8117	131.436
199.765		96	109.785	159.449	93.8117	215.895
463.529		141.255	71.4057	112.748	100.521	334.366
1028.55	328.847	160	133.081	193.608	90.2703	279.692
186.51		218.51	77.6397	123.772	90.2703	236.088
213.019		173.255	107.619	158.424	92.058	97.2241
77.2548		218.51	138.493	195.285	97.2241	200.229
405.019	301.625	277.019	128.682	193.608		226.936
1041.8	40.0185	263.764		109.819		139.846
514.274	494.214	167.765	68.0906	111.293		537.09
295.764	84.8873	263.765	81.4965	121.11		312.706
804.548	39.7349	109.255	88.6953	130.19		184.116
572.784	54.5022	327.764	79.3309	130.19		165.468
1209.57	848.551	128	88.9228	156.353		153.194
167.765		301.255	84.5611	135.104		172.225
844.313	237.195	245.019	93.0601	144.433		112.748
391.765	99.916	282.51	83.8115	135.104		240.194
314.51	41.635	160	71.006	108.324		231.909
167.765		231.765	134.291	190.211		168.397
301.255	80.2815	245.019	82.9069	126.378		370.438
418.274	1188.26	154.51	96.8175	151.051		191.917
572.784	11.0279	186.51	100.999	160.468		95.5331
1752.63	370.097	263.765	96.4806	142.158		207.425
1204.08	367.188	186.51	76.7388	117.004		530.064
1345.33	367.913	327.765		114.184		330.444
250.51		263.765	107.736	170.322		100.521
354.274	16.832	277.019	106.944	156.353		147.779
1220.55	2554.54	154.51	109.248	186.753		169.362
418.274	42.8463	77.2548	158.692	247.545		164.48
482.274	152.891	173.255	86.686	136.305		321.444
991.058	86.5966	199.765	96.5935	159.449		191.917
913.803	82.5283	141.255	92.8718	166.45		268.393
1100.31	505.495	45.2548	71.8146	114.184		95.5331
367.529	635.59	199.764	123.6	174.107		147.779
533.019	33.5639	192	137.309	203.459		223.316
167.764		186.51	165.755	264.725		224.045
341.019		237.255	110.283	160.468		207.425
199.765		231.764	153.87	218.148		130.19
463.529	72.6785	218.51	72.1594	109.819		115.602
961.332	155.706	173.255	136.169	195.285		238.149
282.51		231.765	76.8145	123.772		173.169
386.274	210429	269.255	124.203	186.753		312.184
476.784	25.0003	154.51	72.8265	125.082		280.274
245.019		128	107.935	178.726		153.194
450.274	3279.35	309.019	108.284	176.893		375.247
1047.29	26.8923	186.51	95.8308	141.007		145.557
540.784	360.777	160	113.701	165.468		117.004
623.529	31.2505	154.51	71.2533	126.378		350.547
269.255		90.5097	94.2022	144.433		126.378
508.784	219.087	309.019	110.135	156.353		317.362
1339.84	266.85	141.255	98.6005	166.45		103.713
410.51	416.178	250.51		177.812		109.819
546.274	37.3772	160	129.215	189.353		93.8117
418.274	2671.87	167.765	84.3624	125.082		126.378
559.529	29.192	186.51	166.888	236.777		326.973
2018.66	83.6735	141.255	163.729	231.205		382.133
889.568	30.6074	186.51	108.803	163.487		274.398
514.274	62.0726	309.019	160.836	255.961		97.2241
636.784	33.926	271.529	60.3858	105.272		330.937
1100.31	4855.16	109.255	60.1299	121.11		201.851
874.039	75.1365	199.765	74.5513	132.67		219.637
263.765		192	149.025	195.285		119.757
674.274	199.934	96	164.996	236.088		90.2703
836.548	110.274	167.765	12.0815	102.129		370.878
1044.08	22.6607	173.255	111.305	163.487		199.414
490.039	166.119	218.51	74.0142	121.11		175.969
290.274	79.5777	263.765	104.04	157.392		242.221
618.039	129208	295.765	78.7093	122.449		212.087
548.548	51.76	141.255	99.7777	147.779		128.932
231.765		160	193.421	254.043		209.769
1254.82	263.23	109.255	92.2842	167.427		205.055
1764.55	500.275	205.255		106.809		123.772
444.784	18.4311	90.5097	110.521	173.169		162.487
546.274	38.0215	359.764	156.482	261.628		111.293
386.274	2523.11	224	168.975	248.202		90.2703
141.255		373.019	71.863	117.004		106.809
450.274		186.51	68.3853	111.293		363.779
354.274	150.584	218.51	78.396	144.433		197.772
141.255		309.019		118.388		98.8862
90.5097	3866.59	250.51	178.553	245.562		288.865
1190.82	479.53	192	104.537	165.468		148.878
623.529	2135.89	186.51	203.451	269		206.638
655.529	129.422	322.274	126.034	199.414		231.205
1068.31	33.2692	245.019		108.324		111.293
437.019	23.4056	109.255	60.7325	106.809		90.2703
476.784	514.452	327.764	317.2	106.809		332.411
399.529	396.607	277.019	119.846	176.893		367.346
644.548	32.2429	122.51	125.955	173.169		272.61
927.058	252.453	128	99.9027	147.779		167.427
591.529	33.4697	263.764	79.6371	131.436		226.217
863.058	691.18	167.764	154.726	226.936		347.746
444.784	40.1844	213.019	168.174	279.692		384.259
729.568	18.4555	277.019		98.8862		371.317
625.803	618.919	141.255	76.9553	127.662		383.41
1989.88	218.639	96	122.406	168.397		231.909
1467.84	121.554	199.765	71.8942	108.324		148.878
186.51		154.51	64.7117	114.184		240.194
167.764		173.255	117.209	166.45		98.8862
1036.31	81.5976	295.764		93.8117		298.302
482.274	48.8255	218.51	153.259	212.854		345.395
199.765		173.255	68.4389	108.324		160.468
612.548	32.9054	373.019	130.68	208.21		161.48
676.548	98.7128	314.51		108.324		160.468
985.568	76.6855	141.255	94.4817	152.126		125.082
399.529	2.2637e+07	263.764	116.458	167.427		112.748
224		218.51	14.3498	164.48		152.126
1089.33	34114.4	199.765	91.7357	130.19		112.748
1132.31	211.67	173.255	174.67	252.111		657.426
687.529	116.396	160		155.307		212.854
1073.8	485.44	277.019	121.835	172.225		196.947
804.548	458.23	186.51	96.5157	135.104		115.602
522.039	30.9986	245.019	86.4915	208.991		100.521
887.293	1186.68	141.255	104.649	185.878		216.649
1132.31	526.002	141.255	113.063	184.116		285.46
966.822	332.176	186.51	196.561	273.803		224.771
951.293	21139	77.2548	78.9568	106.809		293.344
1041.8	16.337	186.51	88.1321	138.676		223.316
1132.31	56.3429	186.51	103.582	173.169		100.521
1343.06	77.6934	141.255	163.801	265.34		93.8117
1505.33	84.1806	109.255	136.19	204.258		149.968
199.765		277.019	82.774	127.662		133.893
1294.59	178.559	245.019	83.5017	142.158		117.004
1300.08	100.168	250.51	63.0788	105.272		240.194
1196.31	388.006	250.51	91.794	154.254		238.833
245.019		237.255	89.2029	136.305		703.182
1057.33	158.469	96	70.3825	143.3		435.923
167.764		154.51		143.3		109.819
418.274	15.2252	173.255	66.2812	105.272		183.229
1041.8	95.2505	373.019		98.8862		103.713
399.529	375.707	231.765	143.746	218.894		281.435
1140.08	619.647	122.51	147.379	221.852		374.377
565.019	107.335	263.765	145.02	203.459		171.276
1113.57	177.474	199.764	176.773	258.495		137.496
612.548	639.92	277.019		111.293		92.058
1741.65	156.427	90.5097	131.507	171.276		223.316
309.019	109.887	218.51	74.5079	117.004		203.459
263.765		167.765	189.637	266.565		103.713
199.764		173.255		92.058		216.649
945.803	21.5577	141.255	81.5157	119.757		281.435
463.529	29.291		174.921	270.811		270.209
945.803	1945.82			93.8117		174.107
599.293	807357		69.9499	117.004		102.129
516.548	988.024		89.0599	153.194		174.107
373.019	9458.56		60.5685	97.2241		192.765
916.077	10881.3		117.509	197.772		208.21
1190.82	1690.31			105.272		191.066
1812.08	873.429		121.775	175.969		117.004
2195.14	266.902		61.9495	102.129		210.545
487.764	157.085		132.462	220.378		123.772
572.784	546.475		136.294	215.895		415.244
231.765			57.929	144.433		317.362
657.803	4803.68		92.3525	160.468		515.095
1044.08	100.951		110.894	169.362		440.386
687.529	2243.01			98.8862		216.649
482.274	88.3217		113.021	169.362		115.602
1023.06	58.7489		92.6868	161.48		160.468
431.529	70.3692		168.769	257.231		321.95
708.548	45.7633		181.363	262.25		136.305
663.293	24.1948		20259.3	98.8862		109.819
1081.57	948.068		144.822	212.087		282.014
1228.31	343.84			98.8862		218.894
810.039	18.0829		160.27	224.771		161.48
314.51	149.867			92.058		92.058
514.274	1319.04		121.922	208.21		98.8862
1023.06	102.069		131.012	191.917		108.324
303.529	77.4867		65.7922	112.748		218.148
341.019	15.2732		163.355	241.547		112.748
906.039	126.482		143.102	208.21		255.961
373.019			88.7676	160.468		452.794
495.529	24657.3		68.3496	117.004		343.027
167.764			177.94	245.562		191.066
740.548	1965.41		65.7347	117.004		173.169
359.764			68.9907	103.713		156.353
295.765			126.248	175.041		307.979
405.019	585.212		158.517	222.585		195.285
945.803	104.193		108.14	161.48		95.5331
437.019	1.29606e+06		91.9237	163.487		106.809
1140.08	36.5673		119.914	184.116		351.475
1068.31	220.507		91.1693	148.878		130.19
386.274	322.519		62.2899	102.129		258.495
956.784	1043.47		102.919	155.307		218.894
1211.84	48.922		78.2628	130.19		128.932
778.039	21.144		83.813	123.772		182.337
373.019	14.7076		100.485	167.427		119.757
924.784	333.485		66.5376	108.324		98.8862
887.293	125.332		191.544	284.316		234.007
1004.31	98.4241		166.964	264.725		132.67
631.293	145.476		64.8836	118.388		258.495
1087.06	21.1489		106.877	182.337		90.2703
258.274			99.976	143.3		93.8117
245.019			171.009	241.547		103.713
263.765			129.8	221.852		197.772
263.764			162.548	238.833		109.819
154.51			122.413	236.088		97.2241
921.568	7549.18		126.914	196.947		103.713
1300.08	72.239		197.534	275.583		255.323
1119.06	71.8748		83.0472	137.496		131.436
495.529	3248.51		159.742	226.936		346.807
540.784	105.873		118.297	170.322		250.164
231.765			79.8782	135.104		248.858
258.274			152.812	254.684		112.748
405.019	489.658		140.498	200.229		97.2241
708.548	1549.75		124.865	193.608		305.322
1204.08	53.8546		135.107	196.947		219.637
1071.53	948.193		92.5614	149.968		219.637
945.803	95.3054		64.2597	105.272		354.246
796.784	290.264		65.1439	108.324		255.961
540.784	308.933		124.682	184.116		188.49
697.568	2621.76		81.0835	139.846		93.8117
231.765			150.551	236.777		230.499
780.313	256.381		172.647	261.005		240.194
623.529	152.786		83.8088	147.779		171.276
1036.31	50.2875		140.968	202.656		365.121
463.529	32.0078		85.7195	146.672		353.325
1467.84	118.618			92.058		244.231
522.039	24.003		6.63049	131.436		166.45
205.255			73.5841	125.082		295.006
546.274	305.276		87.2111	144.433		159.449
1305.57	45.9913		95.3643	158.424		126.378
1502.12	62.0222		77.84	117.004		119.757
815.529	61.3576		127.474	177.812		95.5331
1513.1	630.534		108.223	175.041		131.436
431.529	110.629		114.245	170.322		138.676
1023.06	32403.3		93.3144	148.878		123.772
463.529	45.7185		70.7298	123.772		141.007
631.293	388.505		93.5857	152.126		105.272
721.803	3011.24		161.426	250.164		212.854
604.784	7771.34		63.3939	106.809		118.388
586.039	162.061		93.0236	145.557		105.272
405.019	506.505		162.417	234.703		100.521
218.51			96.0164	155.307		213.619
367.529			190.075	273.803		337.761
1492.08	795.403		57.1411	102.129		100.521
700.784	23.9162		124.759	203.459		92.058
767.058	213.189			237.464		147.779
721.803	596815			97.2241		274.991
559.529	30.3926			98.8862		293.344
463.529			115.449	175.969		360.177
1132.31	13837.8			190.211		157.392
642.274	161.189		175.757	244.897		145.557
245.019			90.5167	151.051		142.158
663.293	3105.54		135.399	213.619		98.8862
1009.8	78.7076		186.825	262.25		121.11
1179.84	836.198		144.878	232.61		169.362
450.274	103.628		132.986	186.753		102.129
1648.86	19136.5		141.579	213.619		340.643
290.274			147.673	234.703		111.293
359.764			166.113	230.499		109.819
1068.31	110.914		112.702	162.487		155.307
1041.8	212.703		142.777	224.045		277.352
770.274	577.244		21.9344	201.851		197.772
250.51				95.5331		200.229
186.51			62.56	105.272		214.38
386.274			128.229	185.878		144.433
623.529	63.8611		70.9891	119.757		93.8117
186.51				90.2703		168.397
740.548	74325		108.311	156.353		318.898
399.529	159.678		132.677	191.066		98.8862
535.293	18.8916		109.755	163.487		221.852
1486.59	67.6079		95.8201	136.305		145.557
533.019	8.2217		179.598	254.684		236.777
1145.57	442.725		95.9762	158.424		350.547
199.764			127.196	192.765		200.229
1100.31	29.4949		154.298	261.628		199.414
290.274	949.437		75.0298	132.67		287.734
245.019			15938.3	93.8117		169.362
359.765	50.9729		89.4142	136.305		170.322
1507.61	409.759		96.8251	146.672		123.772
354.274	2730.08		67.5652	118.388		330.937
410.51	25.2153		71.687	115.602		194.448
463.529	156.176		85.9178	154.254		93.8117
495.529	49.1759		61.8992	100.521		182.337
295.764			113.07	207.425		100.521
269.255	560.236		13.2902	182.337		95.5331
642.274	200.87		149.558	251.464		155.307
250.51				151.051		205.848
533.019	22.8676		153.995	269.605		125.082
836.548	1052.32		110.228	164.48		111.293
295.764			153.485	218.148		153.194
1055.06	316.286		90.8873	137.496		157.392
546.274	43.0622		60.9987	118.388		135.104
1145.57	151.432		93.2088	138.676		315.301
309.019			95.9051	153.194		90.2703
985.568	107.922		129.206	187.623		329.456
927.058	156.145		162.052	242.221		194.448
1009.8	70.8196			103.713		125.082
450.274	453.696		55.7818	97.2241		573.483
461.255	31.5893		151.716	222.585		176.893
767.058	4665.4		84.299	136.305		180.541
269.255	41.5784		94.5269	141.007		122.449
540.784	556.073		107.777	172.225		189.353
676.548	612.21		127.324	192.765		329.95
778.039	161.389		112.615	168.397		139.846
186.51			94.7398	151.051		187.623
591.529	402658		78.027	131.436		287.734
1098.04	87.1293		135.229	218.894		431.035
444.784	35.6955		57.2348	95.5331		215.895
122.51			76.8543	138.676		299.393
437.019			94.5847	155.307		98.8862
482.274	31.6099		87.7034	131.436		328.961
868.548	41.7087		133.707	191.066		220.378
295.764			136.626	191.917		148.878
919.293	230.497		68.6861	139.846		97.2241
282.51			179.064	272.012		109.819
508.784	639.138		125.107	207.425		143.3
972.313	29.2702		105.41	156.353		194.448
405.019	27.4241		80.2254	118.388		102.129
1601.33	599.847		162.756	229.08		292.788
514.274	130.335		91.3283	163.487		165.468
263.765			120.479	172.225		156.353
1113.57	394.017		125.068	187.623		103.713
359.764	82.1524		64.6076	106.809		229.08
887.293	169.456		95.725	153.194		301.021
844.313	78.9173		99.509	164.48		331.92
1816.63	145.002		121.443	206.638		274.398
160			157.244	234.007		221.852
559.529	1.44958e+07		126.365	210.545		111.293
1100.31	554.604			95.5331		356.996
972.313	48.6426		153.859	256.596		128.932
258.274			102.513	153.194		244.897
1028.55	135.591		165.054	231.909		111.293
1081.57	44.2169		143.549	189.353		246.225
721.803	394.361		177.414	256.596		261.005
1044.08	128.018		178.999	261.005		194.448
1247.06	2829.79		80.2509	136.305		138.676
993.332	102.803		-3.17194e+06	102.129		367.789
887.293	896.141					155.307
908.313	19.5302					105.272
501.019	444.242					222.585
405.019	231.936					454.59
309.019						240.194
514.274	55.0491					265.34
373.019	46.4958					100.521
141.255						117.004
1390.59	83.0798					92.058
689.803	356.011					131.436
586.039	81.6879					316.333
322.274						148.878
1137.8	849.797					127.662
508.784	11906.5					196.947
753.803	824.71					165.468
2235.84	901.511					135.104
996.548	81.3957					108.324
90.5097						264.725
1177.57	7895.9					367.789
64						125.082
1113.57	183.194					165.468
1062.82	299.724					137.496
290.274	65.0312					161.48
444.784	17.1704					200.229
1004.31	20046.2					123.772
1079.29	339.262					352.863
1891.61	159.676					301.562
623.529	38.8193					141.007
1814.35	111.496					201.042
636.784	105.379					276.174
412.784	4.66037					288.3
1036.31	381.028					97.2241
676.548	26.5741					196.947
1132.31	221.158					256.596
583.764	183.496					127.662
282.51						105.272
663.293	183.156					204.258
527.529	24.4293					164.48
796.784	317.924					172.225
32						223.316
1041.8	192.356					102.129
578.274	393.853					297.207
695.293	91152.4					93.8117
895.058	267.969					303.179
250.51						274.398
224						105.272
431.529	107.172					149.968
708.548	3793.46					184.116
391.764	1113.27					321.95
469.019	50.1858					103.713
90.5097	54.6105					343.976
657.803	18.4138					204.258
778.039	168.409					373.505
231.765						223.316
940.313	1915.64					416.419
831.058	1069.51					215.139
1204.08	113.977					97.2241
295.764	8090.85					135.104
226.274	508.63					143.3
341.019						155.307
1350.82	194.654					131.436
721.803	1511.43					114.184
231.765						196.117
167.764						95.5331
767.058	84.0751					105.272
919.293	646.765					106.809
650.039	120.346					122.449
231.765						105.272
977.803	24.6747					108.324
490.039	1337.52					92.058
386.274	696.916					212.087
1068.31	429.625					143.3
964.548	1463.25					111.293
386.274	313.846					133.893
860.784	70.6211					309.036
1009.8	36.0974					162.487
231.765						217.4
831.058	145.255					115.602
386.274						288.865
735.058	97.2661					421.863
295.764						121.11
998.822	45.3135					263.49
469.019	93.4673					294.453
1592.63	24.833					123.772
186.51						189.353
341.019						274.398
1041.8	1738.6					380.423
437.019						331.429
746.039	71.3837					290.553
335.529	3902.35					93.8117
1034.04	357.969					366.013
732.784	1082.87					105.272
386.274	802.439					132.67
231.765						171.276
753.803	1176.12					303.179
727.293	124.976					114.184
495.529	7.85935e+06					102.129
399.529	6304.73					185.878
1209.57	64.4818					159.449
341.019						187.623
282.51	571.651					98.8862
689.803	4283.64					314.265
953.568	4582.98					238.833
740.548	35.3079					123.772
1068.31	296.953					197.772
1055.06	84.9803					208.21
444.784	2724.63					105.272
341.019	16.2323					280.855
983.293	1099.52					244.897
231.765						214.38
719.529	327.519					205.848
367.529	16.494					317.875
380.784	21.2094					154.254
391.764	148.424					92.058
90.5097	271.694					153.194
269.255	1052.21					294.453
836.548	5189.85					479.029
135.764						103.713
599.293	38.9145					365.121
173.255						165.468
863.058	130.296					177.812
90.5097	900.663					98.8862
1209.57	80.9858					294.453
977.803	1379.07					382.559
719.529	1325.57					156.353
983.293	17.7328					200.229
245.019						219.637
354.274	91.5536					459.936
354.274						182.337
725.019	187.824					336.794
1049.57	131.25					142.158
322.274						360.63
269.255	340.918					223.316
1190.82	173.265					311.662
540.784	223.05					95.5331
373.019	6787.69					102.129
471.293	2861.59					217.4
674.274	256.834					205.055
1268.08	51.0768					119.757
418.274	9.40418					128.932
1047.29	182.288					193.608
295.764						218.148
154.51						421.863
604.784	39.7695					338.724
314.51						98.8862
367.529						98.8862
245.019
604.784	1505.1
173.255
644.548	1591.74
719.529	221.113
695.293	170.196
1396.08	706.929
700.784	37.1903
450.274	402.406
231.765
1004.31	18.4928
881.803	1737.61
245.019
405.019	35.3459
231.765
1017.57	76.9957
945.803	108.52
314.51
444.784	19.6416
527.529	31.7553
527.529	249.318
1049.57	35.581
1094.82	1869.06
554.039	23088.9
998.822	94.1219
463.529	37.6193
895.058	536.933
173.255
167.765
186.51
663.293	117.399
687.529	59.7244
501.019	2210.75
554.039	292.165
322.274	31.2748
625.803	35.7453
682.039	4207.69
1300.08	683.409
482.274	17.28
631.293	15.037
245.019	648.447
423.764	257.141
412.784	405.748
721.803	1482.85
1573.88	124.387
1081.57	4071.95
1119.06	44.1444
812.313	2628.4
578.274	325.645
591.529	279.021
277.019	74.8211
796.784	2486.95
1188.55	408.665
559.529	75.3655
354.274	11.3626
853.019	144.338
173.255
122.51
412.784	97.4819
1247.06	547.346
799.058	92.8573
863.058	363.792
501.019	156.303
565.019	32.3868
1130.04	167.041
354.274
314.51
205.255
469.019
597.019	172.2
572.784	228.068
876.313	893.203
612.548	159.81
740.548	44.9992
945.803	3122.26
482.274	76.6939
514.274	1053.52
314.51	77.73
90.5097
1002.04	49.838
644.548	174.651
1422.59	391.671
806.822	33.1579
373.019	44.5001
476.784	1549.61
870.822	177.218
463.529	2499.29
469.019	56.5866
224
559.529	33.9228
450.274	15.3006
2490.9	157.951
913.803	55.9163
423.764	786210
218.51
785.803	41.0349
913.803	78.1019
263.765
919.293	2359.63
791.293	1214.91
405.019	550.749
490.039	2783.95
1041.8	374.614
533.019	196.775
1007.53	2898.77
245.019
618.039	26.0582
985.568	34.7143
290.274
623.529	32661
450.274	75.5639
277.019
740.548	463.329
109.255
1094.82	143.582
689.803	32.1263
341.019
932.548	163.643
913.803	920.023
128
644.548	321.962
612.548	2767.31
322.274
154.51
527.529	57.1583
205.255
181.019
1073.8	346.134
301.255
199.765
469.019	71.4005
810.039	1251.76
714.039	1359.24
295.765
122.51
1204.08	530.712
759.293	40.4019
580.548	75.7202
554.039	208.763
367.529
245.019
759.293	13490.2
418.274	1103.12
1228.31	800.84
245.019	19244.7
2217.1	90.9906
1318.82	174.592
700.784	39.5129
386.274	22.3908
231.765
1113.57	485.643
1489.8	62.1694
322.274	46.5451
618.039	110.685
335.529	83.5387
1510.82	220.186
167.764
154.51
341.019
546.274	390.263
1012.08	252329
154.51
484.548	13.5165
341.019	20.4174
1435.84	22.5546
868.548	251.786
623.529	75.2657
77.2548
727.293	112.7
799.058	904.993
186.51
322.274	144.943
199.765
314.51
921.568	1125.22
1055.06	189.517
205.255
943.529	206.713
1055.06	822.279
458.039	24.9456
96
791.293	612.674
226.274
455.764	107.432
309.019
889.568	34.6924
295.765	112.7
1094.82	620.286
109.255
141.255
386.274	65535
213.019
412.784	280.894
128
1646.59	227.252
277.019
405.019	51.416
186.51
186.51
290.274	578397
322.274	47.7679
122.51
666.51	363.099
1460.08	249.365
1204.08	2096.19
327.764	3.83399e+06
586.039	126.035
1012.08	207.349
540.784	51.2591
1134.59	65.6364
1183.06	786.229
359.764	264.659
945.803	743.802
559.529	57.0326
1294.59	173.275
1100.31	246.082
482.274	39.7218
1105.8	867.401
1081.57	145.024
522.039	279.193
823.293	23.3666
940.313	89.5299
991.058	237.725
386.274	108.148
1582.59	890.866
367.529
341.019	1.64734e+06
538.51	45.6775
849.803	874.649
263.765
458.039	35.0548
642.274	756.399
186.51
689.803	35.9609
913.803	47.3937
290.274
141.255
418.274	17500.9
1417.1	196.596
391.764	14.5571
301.255
1398.35	6136.66
213.019
135.764
525.255	116.529
1049.57	62.6061
205.255
341.019	403.207
455.764	1118.64
780.313	116.055
463.529	998.733
418.274	42519.5
1475.61	326.168
373.019	77.4434
732.784	144.159
618.039	2238.68
469.019	16.3863
482.274	17.2162
335.529	10.0061
386.274	31.745
945.803	47261.5
263.765
495.529	56.2488
527.529	335.091
90.5097
951.293	91.0687
418.274	106.418
450.274	3369.52
199.765
546.274	14.3795
186.51
1100.31	113.256
245.019
437.019	32.7244
668.784	146.258
378.51	129.077
412.784	278.832
231.765
32
231.765	568.706
1020.78	107.893
205.255
444.784	1548.09
785.803	38.675
908.313	848.409
412.784	102.592
657.803	908.689
785.803	19.334
998.822	74.4208
373.019	75.4699
559.529	2494.3
991.058	154.652
804.548	16.6551
503.293	15.5779
932.548	45.758
367.529	38.7369
391.764	296.536
804.548	27.5013
263.765
623.529	74.1568
1049.57	647.546
341.019	43.2646
154.51
282.51
1066.04	40.0079
109.255
154.51
1094.82	672.156
186.51
431.529	45.2369
508.784	73.5544
1891.61	48.1762
1196.31	135.662
322.274
173.255
1060.55	3024.86
154.51
314.51
245.019
599.293	986.297
1121.33	904.773
540.784	3035.56
167.765
444.784	176.512
732.784	3234.91
554.039	36.9697
1092.55	436.189
450.274	93.4537
231.765
90.5097
471.293	29893.5
836.548	622.567
1241.57	969.401
394.039	329.658
1893.88	415.3
2387.14	1802.04
245.019
495.529
1360.86	222.67
806.822	43.1561
109.255
186.51
1563.84	722.722
554.039	149.807
642.274	170.152
1015.29	224.759
1356.31	598.313
636.784	79.866
245.019
354.274	103.671
546.274	293.388
676.548	66.2103
642.274	1063.43
985.568	6541.55
218.51
322.274	85.3744
1100.31	3068.85
309.019
572.784	53.7992
263.765
689.803	29.9929
559.529	23.9676
352	140.71
636.784	46.8286
940.313	62.7142
341.019	399.073
231.765
501.019	4.47523e+06
367.529	241.678
173.255
141.255
231.765
1070.59	3638.73
295.765
778.039	100.956
1023.06	1042.73
282.51
295.765	12.841
154.51
154.51
1102.59	22.8154
141.255
1140.08	316.581
887.293	27.9363
636.784	171.325
887.293	4854.56
167.764
263.765
341.019
527.529	201.721
644.548	1829.28
309.019
1230.59	161.039
277.019	446.036
804.548	40.4658
508.784	1233.29
612.548	66.0678
213.019
437.019	118.214
495.529	116.579
586.039	31.7444
682.039	7019.91
476.784	2912.64
682.039	3934.33
1560.63	1461.5
154.51
186.51
167.764
290.274
199.765
322.274	31.128
961.332	1206.74
908.313	107.567
772.548	136.086
663.293	40.5942
309.019
314.51	292.084
1284.55	93.6439
780.313	2785.01
405.019	40.8375
186.51
322.274
618.039	202.042
437.019	293.297
732.784	228.755
231.765
1102.59	1059.17
412.784
1190.82	1123.23
154.51
906.039	161.315
1401.57	94.4209
250.51
354.274
450.274	327.824
972.313	296.173
668.784	1631.37
122.51
346.51	196.652
167.765
380.784
173.255
128
1119.06	33.218
314.51	89.2836
309.019
791.293	70.9364
1156.55	616.542
431.529	25.384
791.293	382.326
245.019	30.927
199.765
906.039	33.905
1121.33	4.63144
1151.06	254.002
386.274	890.228
623.529	143.888
96
1092.55	459.075
1249.33	187.719
173.255
599.293	1893.22
141.255
277.019
290.274	12.0234
231.764	549.683
623.529	148.788
921.568	1314.69
135.764
1305.57	70.4326
213.019
1172.08	93.2108
1049.57	291.611
359.764	2494.82
335.529	65535
341.019	566.579
167.765	69.4289
1708.31	1111.28
977.803	1370.55
644.548	404.37
876.313	214.204
572.784	1319.76
290.274	52.3652
1196.31	179.87
674.274	346.483
77.2548
927.058	465.789
1609.1	347.895
639.058	130.637
700.784	2448.13
855.293	495.899
1550.59	712.947
618.039	49.1339
1196.31	282.2
154.51
527.529	60516.9
2073.57	1186.65
604.784	444.788
141.255
348.784
759.293	74.4819
810.039	260.474
418.274	77.73
1531.84	1331.61
405.019	144719
1041.8	43.7476
263.765
218.51
514.274	150.975
295.764
831.058	80.6486
487.764
1819.84	307.201
799.058	155.077
431.529	9336.59
1068.31	356.958
322.274
708.548	80.535
540.784	989.914
346.51	80.0569
380.784	5.20653
1132.31	81.015
1777.8	102.566
951.293	1470.89
565.019	298.75
346.51	69.9985
753.803	160.048
410.51	5897.21
612.548	103.316
341.019	129.64
354.274
586.039	51.9144
109.255
700.784	183.285
373.019	68.1222
1385.1	3075.19
1550.59	2136.76
522.039	32.4759
199.765
586.039	648.583
378.51	74.8726
431.529	47.2693
1539.61	108.049
218.51	65535
405.019
373.019	328.229
961.332	378.548
860.784	65.3096
700.784	186.931
303.529	9.54128
77.2548
245.019
727.293	77.381
908.313	1210.9
359.764	141.473
469.019	72.5149
1087.06	77.1918
154.51
295.764
282.51
405.019
708.548	4282.96
578.274	320.098
378.51	25.1156
154.51
277.019
1507.61	442.426
927.058	2298.54
708.548	174.759
269.255	652.057
703.058	66102.5
516.548	2800.81
863.058	56.1415
173.255
804.548	85.0432
1659.84	265.003
154.51
482.274	60.079
527.529	881.755
977.803	1065.19
167.765
141.255
1750.35	449.785
154.51
77.2548
687.529	3338.68
282.51
1233.8	58.8613
748.313	97.687
269.255
290.274
842.039	122.1
610.274	500.092
122.51
972.313	96.2517
186.51
940.313	362.446
1241.57	33.0048
1332.08	34.1435
141.255
199.765
753.803	1880.53
618.039	619.817
386.274	29.9725
642.274	82.432
373.019	230.937
959.058	424.541
160
849.803	164.063
141.255
980.077	1131.17
213.019	133.276
359.764	295.632
519.764	514.537
1121.33	954.728
578.274	61.5486
610.274	101.776
1017.57	27.1458
487.764	2880.69
476.784	26.6607
367.529
263.765
303.529	34.2549
386.274	54.4409
373.019	88.7646
1089.33	156.888
689.803	424.257
927.058	239.222
650.039	21.4225
900.548	441.503
199.764
231.765
725.019	11894.1
122.51
199.765
514.274
1252.55	977.645
1411.61	21516.5
322.274
689.803	189.348
868.548	751.149
764.784	43.4104
876.313	325.15
1030.82	273.565
250.51	80.2815
1137.8	228.774
783.529	161.037
1044.08	54.2921
876.313	56.1827
868.548	481.975
572.784	309.332
996.548	79.4501
341.019	814.642
810.039	195.178
991.058	623.356
386.274	107.297
940.313	257.708
1265.8	55.7959
522.039	31.9334
109.255
199.765
154.51
263.764
476.784	372.665
128
154.51
482.274	34963.6
1638.82	40.2947
1528.63	78.0401
426.039	72.1255
341.019	50.3306
828.784	357.269
231.765
1364.08	93.5902
767.058	744.519
450.274	14.136
1868.31	67.0441
1254.82	608.996
708.548	54.2261
399.529	28.271
346.51
604.784	21.8161
290.274
173.255
714.039	1105.37
309.019
849.803	764.096
836.548	181.293
895.058	132.975
399.529	127.339
154.51
258.274
1113.57	88.8296
373.019	20811.2
642.274	37.6929
700.784	271.693
1172.08	176.327
442.51	76.2749
727.293	27.7859
1872.86	91.2472
277.019
951.293	2145.09
644.548	286.929
380.784	13.4632
876.313	171.402
418.274	379.731
945.803	5158.98
1068.31	1062.74
599.293	427.725
218.51
359.764	74.4499
823.293	135.352
90.5097	637.533
591.529	71257.4
668.784	141.599
359.764
181.019
676.548	145.745
295.764
218.51
231.765
932.548	2751.87
495.529	559.388
1087.06	86.2897
295.764
482.274	2.30883e+06
695.293	61.9118
1366.35	625.242
991.058	98.0873
167.765
932.548	211.9
778.039	25.8383
463.529	275.083
1004.31	106.206
437.019	3504.09
173.255
322.274
538.51	87.0153
1297.8	107.492
109.255
985.568	32.9204
759.293	786.419
474.51	2471.45
245.019
1593.57	505.888
1375.06	229.162
881.803	38.1746
431.529	23025.2
282.51
173.255
650.039	35907.6
687.529	45.6902
354.274	465.802
1087.06	92.0692
167.764
1089.33	388.515
887.293	101.437
359.764	17.9791
855.293	60.8094
934.822	226.825
580.548	180.765
783.529	408.721
759.293	286.66
245.019
970.039	82.1529
90.5097	152.91
597.019	18.5544
508.784	99.971
682.039	8997.03
314.51
642.274	62.6649
444.784	17.8435
746.039	108.922
663.293	1333.86
796.784	4946.34
405.019	36.0884
423.765	127.979
959.058	261.94
522.039	38.0612
1518.59	162.182
263.765
874.039	1051.82
668.784	68.8037
980.077	96.6541
2887.21	455.282
186.51
924.784	90.1227
199.765
373.019	631.44
668.784	35.4163
2497.33	688.639
1558.35	747.262
849.803	1062.28
186.51
354.274	6.66682
802.274	1252.63
996.548	108.687
548.548	1040.18
341.019	68.2434
301.255	544.84
700.784	196.46
367.529	18.658
487.764	63.6472
1169.8	47.1849
341.019	52.0184
844.313	785.361
282.51
365.255	725.142
2006.35	165.858
714.039	38.9004
817.803	68.5073
593.803	188.384
668.784	96.0151
572.784	211.1
945.803	21.1525
2192.86	108.129
964.548	1053.68
399.529	402.561
154.51
1446.82	2107.7
1936.86	74.3488
618.039	5394.74
250.51
1151.06	19661.3
412.784	642.472
295.765
181.019
426.039	14.4493
1403.84	379.264
167.764
482.274
282.51
508.784	136.62
309.019	2.34271e+06
341.019	186.012
218.51
2008.63	86.0108
1183.06	416.985
772.548	2397.35
450.274	103.016
2355.14	685.774
2405.88	1367.5
444.784	28.5333
160
290.274
567.293	308.632
887.293	17.0946
