# Supplementary material for: Structured illumination microscopy combined with machine learning enables the high throughput analysis and classification of virus structure
Source: eLife journal article supplement (doi:10.7554/elife.40183), 2018-12-13
Supplement: supp [file elife-40183-supp-v1.zip › elife_poa_e40183_Figure_5_source_data_1.xlsx]

## Sheet: B Victoria
Filamentous length	Filamentous persistence length	Small filamentous length	Large spherical ELM radius	Large spherical equivalent radius	Small spherical radius	Unknown equivalent radius	Rod length	Rod diameter
245.019		192		119.757	93.8117	100.521	540.197	172.098
444.784	37.6443	173.255		93.8117	98.8862	153.194	705.416	164.095
122.51		141.255		145.557	100.521	131.436	320.107	194.141
391.764	14.2788	282.51		163.487	111.293	128.932	625.767	154.467
631.293	77.8629	167.765		112.748	90.2703	98.8862	65535	91.7906
444.784	18.5574	154.51	89.2321	141.007	100.521	156.353	647.161	166.181
205.255		231.765	61.7526	103.713	103.713	108.324	65535	120.748
309.019		109.255	102.874	157.392	103.713	141.007
373.019		314.51	70.1302	117.004	93.8117	114.184
77.2548		154.51	91.6483	145.557	103.713	132.67
96		231.765	78.0084	122.449	111.293	127.662
586.039	69.7059	154.51		122.449	108.324	174.107
386.274	636.248	322.274	75.0609	112.748	90.2703	145.557
522.039	481197	141.255	71.3306	125.082	95.5331	198.595
810.039	147.787	231.765	99.2631	153.194	90.2703	155.307
559.529	59.9956	301.255	68.6047	106.809	95.5331	155.307
231.765		199.765	128.995	202.656	98.8862	139.846
391.765		245.019	106.321	158.424	93.8117	139.846
295.764		218.51	87.6651	148.878	92.058	220.378
463.529	21.3411	109.255	84.8485	137.496	92.058	160.468
237.255	263.039	77.2548	58.9471	93.8117	100.521	153.194
519.764	142.434	173.255	118.434	174.107	98.8862	202.656
327.764		263.764	91.369	142.158	108.324	98.8862
295.764		109.255	102.577	153.194	92.058	152.126
295.764		122.51	79.6535	131.436	93.8117	180.541
218.51		218.51	80.2316	121.11	92.058	109.819
173.255		186.51	14423.4	95.5331	90.2703	133.893
122.51		359.764	112.477	174.107	95.5331	153.194
650.039	229.821	237.255	71.528	117.004	114.184	106.809
631.293	437.328	250.51	66.5445	108.324	93.8117	160.468
458.039	39.5325	154.51	77.4354	119.757	92.058	137.496
186.51		218.51	77.9221	115.602	98.8862	136.305
186.51		373.019	68.5451	103.713	98.8862	118.388
740.548	59.1029	109.255	92.2446	138.676	93.8117	188.49
245.019		309.019	92.9536	141.007	102.129	114.184
354.274	66.6833	231.765	102.747	158.424	92.058	231.909
367.529		295.765	116.312	191.066	90.2703	108.324
567.293	45.8926	218.51	82.2053	137.496	93.8117	215.895
623.529	164.394	167.765	106.488	159.449	95.5331	118.388
399.529	2.56606e+06	231.765	93.3911	152.126	92.058	170.322
277.019	28028.3	154.51	92.8989	149.968	92.058	143.3
64		64	93.8998	151.051	103.713	205.848
231.765		141.255	64.9047	102.129	108.324	175.041
463.529	149.643	218.51	104.622	159.449	100.521	162.487
663.293	107.61	213.019	93.3408	139.846	112.748	148.878
431.529	262.328	109.255	86.3459	137.496	97.2241	97.2241
173.255		160	112.767	182.337	95.5331	98.8862
508.784	80.4772	199.765	119.555	182.337	95.5331	97.2241
959.058	665.494	250.51	88.6059	142.158	97.2241	146.672
463.529	92.2872	186.51	86.3079	138.676	106.809	93.8117
868.548	288.913	154.51	67.0735	111.293	105.272	179.636
263.765		258.274	97.9316	139.846	111.293	224.045
487.764	165.475	205.255	74.1311	118.388	100.521	112.748
1151.06	819.612	231.765	96.0758	148.878	98.8862	130.19
309.019		231.765	86.7077	130.19	111.293	217.4
231.765		218.51	77.4541	119.757	95.5331	158.424
418.274	32.8653	186.51	114.344	159.449	106.809	126.378
636.784	4092.18	373.019	67.0671	106.809	98.8862	157.392
167.764		173.255	77.8489	122.449	93.8117	106.809
644.548	56.8219	205.255	94.0577	144.433	93.8117	138.676
199.765		327.764	89.0567	131.436	108.324	182.337
527.529	405.348		79.2288	131.436	92.058	128.932
186.51			88.5145	132.67	97.2241	201.851
45.2548			84.1141	136.305	103.713	97.2241
32			96.4011	148.878	95.5331	181.441
282.51			90.971	136.305	114.184	132.67
154.51			81.371	123.772	93.8117	147.779
77.2548			91.9012	144.433	90.2703	160.468
224			107.821	158.424	100.521	178.726
391.764	369.516		92.6126	137.496	92.058	125.082
354.274			80.3351	125.082	93.8117	125.082
128			67.3266	106.809	93.8117	114.184
77.2548			95.2871	138.676	90.2703	147.779
218.51			73.1419	125.082	114.184	131.436
90.5097			75.2127	115.602	115.602	201.042
290.274			102.316	151.051	103.713	102.129
205.255			78.9226	125.082	112.748	132.67
277.019	15.8779		158.553	237.464	109.819	191.066
199.765			107.177	169.362	93.8117	156.353
90.5097			80.227	126.378	95.5331	146.672
495.529	839.508		66.9199	118.388	90.2703	125.082
231.765			60.042	93.8117	98.8862	133.893
186.51			94.9577	142.158	109.819	168.397
109.255			102.278	172.225	112.748	111.293
823.293	2.85351e+06		73.8999	114.184	109.819	132.67
405.019	34.783		81.7104	127.662	114.184	165.468
141.255			84.0013	136.305	95.5331	147.779
290.274	185.654		120.396	194.448	100.521	136.305
380.784	180.189		85.9674	137.496	109.819	102.129
231.765			61.9922	103.713	108.324	142.158
282.51			84.0151	127.662	97.2241	173.169
45.2548			86.6634	133.893	97.2241	162.487
450.274			67.3621	112.748	106.809	136.305
231.765			83.3899	135.104	111.293	131.436
122.51			96.744	149.968	103.713	100.521
109.255			93.1449	146.672	97.2241	156.353
154.51	28.6747		108.096	160.468	97.2241	153.194
295.764	89.1859		81.6058	125.082	100.521	160.468
205.255			92.3541	136.305	100.521	142.158
218.51			67.5797	106.809	97.2241	180.541
263.764			98.5794	141.007	98.8862	105.272
122.51			125.753	206.638	90.2703	111.293
109.255			86.5069	125.082	93.8117	152.126
753.803	383.016		95.2735	147.779	105.272	151.051
218.51	250.823		95.8086	135.104	95.5331	139.846
218.51			88.7987	138.676	100.521	109.819
367.529	119.126		107.814	165.468	98.8862	165.468
77.2548			70.911	112.748	93.8117	149.968
231.765			76.3856	126.378	98.8862	144.433
508.784	6.73359e+06		145.47	228.368	106.809	139.846
450.274	23.169		92.344	137.496	100.521	180.541
650.039	137.101		86.4994	151.051	109.819	117.004
2383.92	96.4225		70.6347	118.388	92.058	108.324
109.255			113.714	167.427	100.521	154.254
213.019			67.8243	109.819	93.8117	100.521
354.274			96.8849	145.557	98.8862	112.748
90.5097			80.4388	123.772	95.5331	151.051
32			110.301	184.116	92.058	108.324
173.255			91.5618	136.305	100.521	144.433
186.51			89.027	141.007	90.2703	133.893
231.765	17.5054		77.6072	149.968	108.324	144.433
250.51	134.322		71.2407	114.184	93.8117	270.209
90.5097				119.757	100.521	119.757
186.51			98.6966	146.672	108.324	168.397
77.2548			72.2093	115.602	92.058	162.487
399.529	30.8913		90.819	143.3	100.521	118.388
309.019	282.726		121.812	183.229	98.8862	123.772
341.019	65535		70.442	111.293	90.2703	114.184
199.765			78.5788	135.104	102.129	187.623
77.2548			78.8909	127.662	100.521	106.809
412.784			67.9019	108.324	100.521	108.324
469.019	97.2662			128.932	97.2241	148.878
572.784	6.72192e+06		73.1682	122.449	92.058	174.107
173.255			100.35	147.779	90.2703	106.809
551.764	2615.12		77.3962	118.388	93.8117	146.672
186.51			83.5457	137.496	93.8117	175.969
258.274				100.521	90.2703	98.8862
141.255			81.7637	122.449	97.2241	125.082
495.529	42.5742		94.7829	145.557	102.129	112.748
109.255			75.3117	131.436	90.2703	114.184
380.784	1673.87			115.602	95.5331	188.49
277.019			131.456	201.042	106.809	92.058
994.274	727.07		94.0064	133.893	90.2703	102.129
591.529	178.642		88.8579	136.305	90.2703	118.388
122.51			96.7776	146.672	92.058	98.8862
439.293	22308.8		82.9347	126.378	95.5331	157.392
309.019			85.9695	130.19	103.713	119.757
167.764			78.3391	128.932	93.8117	123.772
277.019				121.11		109.819
874.039	12581.4		75.6404	119.757		151.051
586.039	114.816		78.8737	121.11		105.272
77.2548			85.1312	132.67		158.424
186.51			90.5626	146.672		154.254
327.764	3106.68		97.257	145.557		117.004
586.039	63.9329		79.8687	130.19		173.169
546.274	41.0493		98.5656	144.433		149.968
64			91.2701	136.305		132.67
122.51			83.529	133.893		126.378
64			64.7332	105.272		115.602
77.2548			105.816	152.126		145.557
141.255			76.2611	118.388		130.19
277.019			90.9402	143.3		171.276
341.019	469.297		119.808	184.999		118.388
231.765			68.0732	98.8862		149.968
109.255			64.9484	106.809		161.48
263.765			101.285	148.878		123.772
231.765			88.4036	136.305		117.004
218.51			82.4591	130.19		163.487
154.51			81.7434	132.67		132.67
122.51	533.036		72.7073	170.322		132.67
45.2548			111.438	169.362		176.893
199.765			98.4613	148.878		109.819
64			102.011	152.126		103.713
90.5097			82.4883	127.662		105.272
122.51			118.504	170.322		138.676
64			99.1804	145.557		159.449
77.2548			94.5373	155.307		128.932
405.019			76.3915	115.602		173.169
45.2548				114.184		151.051
141.255	64.6045		93.586	136.305		159.449
431.529			-326.195	92.058		95.5331
77.2548				95.5331		127.662
205.255	136.44		79.2602	123.772		135.104
122.51			81.5988	127.662		190.211
508.784			88.8613	137.496		143.3
540.784			80.5937	118.388		122.449
354.274	97.7335		90.7685	145.557		224.045
186.51	982.397			119.757		187.623
128	1772.02		94.754	146.672		149.968
263.764			79.5478	130.19		93.8117
128			105.561	157.392		151.051
644.548			96.1915	153.194		114.184
205.255			77.3711	125.082		102.129
96	1124.21		73.4727	112.748		191.066
263.765	79.2841		79.6693	128.932		127.662
186.51	85.1655		76.4141	119.757		125.082
650.039			108.61	157.392		141.007
154.51			81.3166	130.19		261.628
263.765	709.562		75.9527	121.11		95.5331
199.765			92.0799	137.496		179.636
167.764			74.2503	114.184		123.772
269.255			78.0583	128.932		144.433
154.51			92.8641	137.496		138.676
154.51			119.835	169.362		152.126
831.058			76.2778	112.748		149.968
231.765			78.5713	127.662		144.433
231.765			109.868	157.392		142.158
122.51	58.0812		108.563	158.424		135.104
450.274			71.6376	118.388		95.5331
181.019			97.6044	142.158		169.362
237.255			82.2438	127.662		135.104
199.765	961.958		73.3464	112.748		125.082
540.784			72.4306	111.293		102.129
386.274	65535		72.4968	117.004		199.414
250.51	75.9205		362.816	95.5331		181.441
373.019	390.683		70.3602	115.602		147.779
373.019	254.55		80.9634	141.007		169.362
802.274			70.1835	115.602		175.969
167.764	16555.3		100.319	157.392		153.194
373.019			107.578	155.307		132.67
109.255	55.5192		92.274	168.397		118.388
160			84.307	141.007		106.809
290.274	2.18178e+06		82.975	121.11		112.748
154.51			74.6902	121.11		159.449
45.2548			91.3693	158.424		115.602
218.51			79.026	109.819		135.104
186.51			95.9669	137.496		108.324
109.255			86.447	133.893		102.129
290.274				103.713		144.433
154.51			91.4493	139.846		180.541
586.039			124.557	173.169		117.004
538.51			94.6415	142.158		111.293
391.764			103.582	160.468		135.104
122.51			86.2031	125.082		95.5331
282.51	647.09		88.7439	139.846		109.819
173.255	2710.7		96.7939	146.672		108.324
90.5097			86.8823	136.305		115.602
199.765			80.1356	130.19		171.276
77.2548	80.2815		68.7632	117.004		106.809
205.255			117.112	180.541		159.449
535.293			82.449	133.893		122.449
186.51				109.819		114.184
469.019	153.856		109.328	170.322		131.436
900.548			76.2886	117.004		148.878
682.039	160.847		74.084	119.757		114.184
962.274	151.082		79.4633	126.378		103.713
565.019	25.0797		82.2886	132.67		106.809
503.293	113.502			136.305		119.757
501.019	554668			131.436		128.932
623.529	759.241			137.496		138.676
463.529	106.638			147.779		149.968
154.51	57.9218			112.748		125.082
508.784	47.75			147.779		122.449
828.784	32.0022			90.2703		139.846
423.764	14.7905		75.9005	122.449		127.662
354.274			68.9995	111.293		133.893
490.039	687.361		99.6139	143.3		118.388
380.784	1236.01		87.6459	135.104		139.846
231.765	22221.2		109.901	160.468		139.846
290.274			100.107	143.3		153.194
386.274	930.491		79.0643	125.082		145.557
612.548	254.583		72.7849	118.388		152.126
173.255			135.353	201.042		157.392
277.019	563.6		97.361	169.362		139.846
346.51	124467			109.819		147.779
160	41.6799		70.1229	108.324		180.541
636.784			118.087	189.353		138.676
186.51			90.5458	149.968		250.815
706.274	91.2217		84.2586	128.932		127.662
495.529			86.0216	128.932		176.893
327.764	415.838		75.7158	115.602		142.158
141.255			79.4061	121.11		267.785
231.765	73.6567		106.745	154.254		141.007
354.274	21.781		79.8495	130.19		136.305
895.058			81.4353	137.496		123.772
373.019			76.2017	123.772		201.042
535.293			103.398	154.254		108.324
373.019			105.337	182.337		184.999
418.274	121.732		106.289	163.487		182.337
186.51			84.5959	132.67		135.104
495.529	1329.44		86.7636	145.557		118.388
186.51			76.8021	136.305		114.184
199.764	95.4818		91.9174	139.846		141.007
689.803			102.781	151.051		176.893
631.293	1040.39		101.43	149.968		174.107
682.039			127.823	182.337		213.619
199.765			77.3164	133.893		128.932
205.255	10525.7		78.583	122.449		118.388
167.764	49.6418		78.8436	128.932		157.392
295.764	99.3968		85.3594	132.67		128.932
431.529			95.434	142.158		177.812
450.274			118.733	176.893		109.819
109.255			97.603	151.051		178.726
250.51			64.2802	108.324		160.468
405.019	37.1083		98.6293	158.424		196.947
341.019	112.612		91.206	139.846		114.184
450.274			68.7238	115.602		156.353
277.019			98.9986	166.45		133.893
109.255	6568.39		71.2376	114.184		98.8862
487.764	36.9663		92.2358	145.557		167.427
533.019	315.883		82.5989	128.932		143.3
442.51			105.473	169.362		125.082
186.51			102.128	156.353		133.893
122.51	719.638		93.8688	145.557		148.878
237.255	14353.5		82.0778	133.893		142.158
586.039	483370		90.2259	136.305		119.757
913.803			79.5296	139.846		146.672
199.765			102.801	163.487		119.757
109.255			83.0058	130.19		126.378
367.529	48.4714		80.6074	127.662		112.748
386.274	107.405			105.272		136.305
668.784			85.2134	136.305		127.662
461.255			89.9451	136.305		133.893
245.019	89.3145		82.5759	135.104		262.25
642.274			77.7431	119.757		157.392
245.019	16.5607		84.0479	131.436		118.388
154.51	3392.42		82.0804	141.007		170.322
122.51			103.334	153.194		123.772
186.51	1435.22		75.7882	115.602		133.893
599.293	264.044		74.1774	123.772		123.772
533.019			88.5959	137.496		193.608
282.51			106.823	160.468		156.353
154.51			83.403	131.436		114.184
540.784	404.744		85.0715	144.433		111.293
508.784	24.314		128.142	194.448		102.129
418.274			100.776	155.307		114.184
231.765			68.4746	105.272		121.11
674.274	56.8561		108.291	176.893		128.932
578.274	11.4402		69.3952	109.819		250.164
682.039	60.6959			103.713		137.496
295.764			102.776	156.353		141.007
231.765	197.89		99.1774	147.779		133.893
386.274	23893.8		65.3479	100.521		118.388
476.784	340.677		93.0743	147.779		139.846
154.51	18.3		74.1181	115.602		136.305
373.019			60.504	103.713		314.783
423.764	95.0616		94.8052	157.392		102.129
426.039	65535		100.04	148.878		179.636
810.039				111.293		142.158
559.529	115.916		74.0078	111.293		152.126
199.765	25.8236		88.1445	128.932		106.809
109.255				145.557		151.051
469.019	260.559		79.5017	126.378		133.893
799.058	513.862		61.376	105.272		90.2703
154.51			76.3246	109.819		136.305
527.529			81.8283	133.893		115.602
213.019	76.679		99.0259	156.353		173.169
671.058	32.1804			105.272		106.809
580.548			71.7253	115.602		184.116
463.529	47.9982		85.7407	136.305		118.388
708.548			71.7174	108.324		143.3
559.529	8.93796e+06		75.9816	127.662		98.8862
708.548	59.3606		67.1409	108.324		128.932
122.51	5617.98		76.6543	115.602		195.285
380.784	41.45		103.783	155.307		138.676
540.784	382.653		68.8418	115.602		119.757
218.51	155.992		73.1939	128.932		121.11
277.019	755.238		77.5106	126.378		105.272
314.51			73.4532	128.932		141.007
258.274	98.2842		333.823	90.2703		133.893
551.765	13509.9		89.4151	145.557		127.662
740.548			88.6725	135.104		103.713
1073.8	21.3241		-8.67305	105.272		170.322
644.548	89.8339		65.2845	105.272		117.004
231.765			85.6753	138.676		178.726
154.51	1283.44		65.5321	109.819		111.293
455.764	79.02		110.314	174.107		195.285
540.784	286.478		87.5151	143.3		252.757
444.784	863.741			127.662		149.968
231.765				177.812		204.258
199.765				102.129		146.672
644.548	496.853		119.114	167.427		162.487
341.019	314.989		71.7354	112.748		105.272
295.764	717.338		102.484	156.353		152.126
655.529			76.5574	125.082		157.392
631.293			63.2301	105.272		100.521
668.784	1295.68		94.1227	144.433		126.378
322.274	198.355		92.0243	135.104		141.007
141.255			104.279	156.353		136.305
199.765	67.2691		70.6534	114.184		148.878
546.274	616.86		70.0851	108.324		106.809
828.784	312.658		76.2123	119.757		117.004
186.51			120.267	183.229		204.258
455.764			86.1962	135.104		221.852
282.51			92.7052	143.3		118.388
471.293	29158.9		87.5268	135.104		100.521
495.529	51005.8		67.9362	125.082		164.48
263.764			125.932	195.285		216.649
514.274	473.22		104.712	154.254		197.772
476.784			83.443	123.772		164.48
887.293	39.5695		73.8191	115.602		204.258
527.529	2452.76		94.8466	158.424		137.496
1563.84			148.515	231.909		117.004
277.019	742.11			154.254		127.662
258.274	560.87		93.3889	141.007		151.051
373.019	623.791		88.4165	127.662		138.676
277.019	1089		83.3582	130.19		144.433
655.529	60.6705		96.5768	145.557		128.932
186.51				100.521		155.307
602.51	238158		122.902	176.893		184.116
405.019	136.769		90.3385	142.158		143.3
527.529	90.904		87.9573	133.893		147.779
426.039	30.5702		75.8597	112.748		119.757
591.529	261.408		106.388	161.48		155.307
367.529	80.1809		76.5996	115.602		184.999
218.51			125.716	218.148		141.007
322.274	57.0016		87.0627	135.104		163.487
218.51			94.1852	156.353		115.602
109.255	128.921		93.3101	141.007		127.662
322.274	1048.96		75.9113	114.184		142.158
154.51			109.807	176.893		248.858
109.255	11.1174		119.416	190.211		119.757
423.764				105.272		227.653
295.764			44.1265	260.379		105.272
335.529			75.5005	118.388		125.082
199.764			75.4173	111.293		135.104
231.764			87.4389	137.496		119.757
173.255	121.084		79.6096	125.082		139.846
122.51			87.3764	130.19		138.676
141.255			73.7776	122.449		112.748
205.255			78.2837	119.757		177.812
578.274			90.6887	132.67		163.487
1034.04			90.3165	139.846		169.362
367.529			96.311	142.158		133.893
173.255			90.377	138.676		165.468
380.784	137.532		64.1964	111.293		130.19
540.784	64.5915			93.8117		109.819
122.51	88.8176		91.7133	142.158		112.748
282.51			86.1463	125.082		138.676
373.019			104.795	178.726		92.058
341.019	57.5616			93.8117		97.2241
167.765	44.9589			119.757		170.322
354.274			76.8955	112.748		260.379
341.019	77.73		73.9566	114.184		165.468
250.51			90.3078	139.846		144.433
122.51			74.3078	121.11		111.293
380.784			91.1696	135.104		193.608
173.255			72.9632	114.184		137.496
727.293			86.6678	133.893		147.779
700.784			78.9108	126.378		111.293
559.529			115.864	164.48		212.087
250.51	53095.6		30.5307	182.337		136.305
618.039			71.2437	109.819		194.448
367.529	93.521		103.255	167.427		194.448
154.51	40.3687		72.3246	108.324		155.307
1132.31	296.303		91.8865	135.104		170.322
359.764			59.9682	102.129		193.608
173.255	33.5211		82.4619	127.662		131.436
109.255	146481		66.6419	106.809		106.809
231.765			80.1124	126.378		103.713
618.039	436.602		64.9193	112.748		196.947
245.019	14.8506		101.319	167.427		184.116
90.5097			99.13	156.353		154.254
514.274			110.71	171.276		97.2241
109.255			85.9816	133.893		163.487
431.529	24.2232		92.5674	143.3		183.229
141.255			112.247	169.362		141.007
450.274			85.9428	130.19		125.082
501.019	100.381			98.8862		149.968
282.51			87.9209	130.19		136.305
263.764			82.9257	125.082		105.272
173.255				112.748		204.258
199.765	369.371		83.9102	125.082		125.082
250.51	11.1869		106.537	160.468		191.917
522.039			110.935	157.392		115.602
386.274			73.8242	117.004		157.392
405.019			85.2949	127.662		106.809
309.019			62.7783	103.713		227.653
399.529			87.8421	138.676		198.595
801.332	1117.91			97.2241		175.969
418.274			75.2656	118.388		103.713
554.039	37.7755		78.6653	127.662		166.45
804.548	66.8118		91.5216	139.846		111.293
263.765	604.177		73.6379	111.293		173.169
218.51	2498.77		92.2386	141.007		171.276
463.529	519.187		78.9713	133.893		118.388
309.019	788.954		15732.3	109.819		203.459
748.313	1076.51		81.9889	125.082		215.139
636.784	75.2473		81.579	128.932		118.388
109.255			62.8286	103.713		122.449
450.274	94.8635		100.235	148.878		138.676
245.019	214.548		82.1347	132.67		208.991
386.274	55.4524		65.1011	106.809		161.48
290.274	792.541		112.304	164.48		121.11
141.255			93.5568	146.672		141.007
346.51	691.972		68.4461	106.809		195.285
122.51			122.008	180.541		139.846
857.568	14.5112		72.5872	114.184		162.487
767.058	327.305		75.6717	119.757		200.229
199.765			95.3356	143.3		131.436
186.51			86.4322	148.878		168.397
192			66.5015	106.809		181.441
245.019	1954.02		74.3819	106.809		142.158
245.019	11401.4		70.7146	109.819		115.602
309.019				100.521		164.48
386.274			73.4925	112.748		106.809
245.019	25.2104		65.1974	105.272		160.468
469.019			75.8662	127.662		138.676
1230.59			76.9805	117.004		192.765
367.529	84.8362		76.9456	122.449		215.895
109.255			67.9002	112.748		214.38
1518.59			65.5596	112.748		343.027
154.51	164.019		75.2822	126.378		152.126
303.529	36.8006			152.126		95.5331
514.274	22832.4		89.1037	138.676		155.307
327.765			82.0487	118.388		225.495
231.765	40.9649		73.0716	111.293		146.672
122.51				112.748		133.893
508.784				130.19		102.129
354.274	804.096		81.0851	121.11		103.713
951.293	163.416		87.319	145.557		175.969
154.51				114.184		106.809
122.51			105.383	158.424		97.2241
636.784	100.309		100.105	173.169		137.496
322.274			62.462	100.521		118.388
90.5097	92.8289		74.9101	109.819		153.194
122.51				95.5331		142.158
154.51			86.5358	133.893		158.424
141.255	37.9501		106.792	161.48		205.848
714.039	26.3226		91.2767	137.496		98.8862
218.51			73.3949	109.819		163.487
554.039			84.6504	132.67		108.324
186.51			71.1461	106.809		198.595
316.784			99.1338	148.878		155.307
418.274	86.3574		68.084	109.819		105.272
559.529			68.965	108.324		126.378
399.529	73.2409		65.666	103.713		163.487
631.293			64.0276	103.713		174.107
122.51	379.23		79.9851	117.004		130.19
437.019	3750.85		77.8802	125.082		177.812
831.058	24.8289		94.2251	148.878		211.317
508.784	201.186		76.6203	117.004		175.041
418.274	93615		73.711	119.757		154.254
341.019			75.1618	117.004		147.779
527.529	504.422		64.1864	105.272		106.809
604.784	197.916		68.4518	106.809		138.676
501.019	405.907		76.7701	121.11		118.388
282.51			80.8952	108.324		123.772
199.765			85.1975	127.662		205.055
572.784	145.188			128.932		138.676
367.529	66.3814		99.1263	151.051		163.487
663.293	177.041		74.7824	118.388		172.225
277.019				230.499		193.608
1081.57				186.753		254.043
572.784	756.374		93.3123	138.676		112.748
231.765	6632.89		88.1586	138.676		152.126
309.019	782.191		85.9043	142.158		185.878
277.019	161.485		82.5773	123.772		115.602
250.51	34.1678		79.0387	122.449		154.254
642.274	1350.34		89.9889	139.846		136.305
314.51			80.702	143.3		265.953
727.293	386.05		87.3486	136.305		158.424
154.51			69.3078	111.293		95.5331
546.274			99.0206	152.126		109.819
391.764	365.422		76.1018	122.449		215.895
482.274	5.22149e+06		96.1796	158.424		158.424
380.784	961.583			102.129		192.765
767.058			70.0048	108.324		203.459
522.039	28.8577		91.5145	152.126		286.599
231.764	7593.27		104.988	170.322		122.449
567.293			71.791	115.602		111.293
450.274	42.7673		84.6629	130.19		115.602
578.274			91.6816	138.676		154.254
1119.06	148.267		101.02	147.779		115.602
218.51			78.0265	117.004		115.602
90.5097			64.7165	105.272		202.656
559.529	963.357		85.8158	132.67		160.468
231.765	107968		100.047	156.353		147.779
109.255	649.517		61.3152	97.2241		105.272
90.5097	310.819		83.6018	131.436		205.055
64			93.2403	151.051		132.67
386.274			92.1878	147.779		217.4
785.803			88.2319	138.676		190.211
463.529			111.634	165.468		182.337
469.019			86.2033	131.436		109.819
1126.82	45.925		95.0624	147.779		139.846
32			69.9139	114.184		111.293
631.293	79.2841			115.602		152.126
90.5097	114.392		88.6776	139.846		156.353
844.313	563.348		99.6241	154.254		100.521
250.51	466.01		79.6696	123.772		136.305
250.51	70.0332		91.8986	144.433		108.324
231.765			62.5362	102.129		154.254
367.529	735.035		78.7219	123.772		162.487
327.764			79.6012	135.104		189.353
309.019	226260			119.757		202.656
231.765			119.934	171.276		122.449
540.784			85.4635	138.676		158.424
367.529			104.901	160.468		202.656
309.019	49.0987		95.6881	147.779		103.713
160	377.757		93.087	141.007		139.846
1742.59	61.3603		94.4215	143.3		162.487
426.039	26.8237		92.7096	147.779		144.433
309.019	377.219		93.739	139.846		205.848
250.51	21.9747		81.7533	130.19		102.129
386.274			69.7199	108.324		136.305
231.765			94.3409	141.007		102.129
508.784	328.088		86.0496	137.496		133.893
450.274	469.703		108.136	158.424		153.194
546.274	147.287		75.5	118.388		143.3
122.51			112.479	173.169		109.819
77.2548			61.9932	106.809		158.424
322.274			91.4854	135.104		135.104
250.51	61780.3		87.4853	141.007		128.932
245.019			119.511	189.353		146.672
109.255	116.214		79.1503	132.67		137.496
263.765			73.2776	125.082		145.557
77.2548			95.4171	147.779		111.293
623.529	7014.93		78.2359	125.082		93.8117
186.51			84.54	128.932		126.378
444.784			66.1742	125.082		191.066
322.274			139.66	212.854		127.662
386.274	15.8124		70.5667	111.293		175.969
231.765			94.2574	135.104		162.487
855.293	40.4044		118.297	177.812		184.116
405.019			62.7096	102.129		95.5331
173.255	85.7076		88.2129	138.676		105.272
218.51			86.2563	139.846		117.004
277.019	51.4703		80.1424	133.893		118.388
231.765			95.1438	151.051		111.293
154.51				97.2241		130.19
290.274	44.4651		105.962	187.623		161.48
380.784	197.237		79.3498	125.082		98.8862
831.058			70.4646	118.388		130.19
535.293			65.944	105.272		175.041
895.058			70.0579	112.748		146.672
167.764			79.7322	127.662		170.322
186.51			90.8014	137.496		157.392
77.2548	94.2395		86.4551	143.3		145.557
767.058	74.8188		97.2973	147.779		175.969
322.274	5121.06		70.3233	108.324		175.969
359.764	2223.54		96.504	148.878		106.809
354.274	133.183		80.9754	133.893		169.362
405.019			102.709	155.307		132.67
45.2548				198.595		137.496
966.822			108.331	154.254		109.819
1009.8	35.3932		79.9476	123.772		163.487
636.784			100.768	144.433		344.922
322.274	4117.54		80.8697	128.932		169.362
245.019	20.066		85.806	136.305		98.8862
45.2548	42.7189		86.1817	133.893		179.636
109.255				115.602		95.5331
322.274	75.5399		96.313	151.051		111.293
263.764	75.1159		102.612	154.254		178.726
322.274	60.2903		132.303	201.042		148.878
906.039			91.8874	155.307		186.753
173.255	10.9705		70.5827	114.184		139.846
458.039			81.832	132.67		201.042
167.764			126.467	184.999		105.272
295.765			77.246	127.662		147.779
167.764	158.532		75.2186	119.757		185.878
373.019	498.861		93.3394	144.433		218.894
173.255	815.776		89.552	146.672		139.846
951.293			77.8449	117.004		131.436
90.5097	438.912		75.5166	114.184		128.932
650.039			83.5217	126.378		97.2241
636.784			83.2825	131.436		165.468
450.274				130.19		127.662
631.293	206.423		100.522	157.392		100.521
463.529			78.4938	126.378		241.547
167.765	3839.33		88.183	149.968		162.487
167.764			93.2227	142.158		162.487
572.784	27.6974		101.095	153.194		228.368
625.803	49.4805		86.7063	143.3		146.672
506.51	36.4636		85.7077	133.893		152.126
748.313	883.371		68.6687	106.809		141.007
154.51	5351.33		64.0901	105.272		118.388
96			97.7206	147.779		93.8117
77.2548			67.4376	157.392		167.427
503.293	247.755		93.5522	133.893		114.184
154.51	1.50539e+06		75.9904	118.388		221.116
423.764	60.4038		99.9733	148.878		167.427
231.765	72.7355		98.9418	146.672		262.871
90.5097			77.4221	122.449		138.676
405.019			71.1161	114.184		171.276
554.039			102.391	156.353		132.67
160			103.155	160.468		105.272
245.019			105.592	168.397		98.8862
386.274	399.445		100.68	152.126		111.293
540.784			105.555	151.051		136.305
277.019			84.0332	130.19		111.293
167.764	343.534		77.0662	119.757		188.49
77.2548			96.4684	149.968		127.662
277.019			79.1923	119.757		152.126
109.255			78.92	128.932		144.433
1002.04				102.129		149.968
77.2548	123.046		118.885	180.541		126.378
378.51	678.968		84.0955	147.779		183.229
122.51			72.9011	115.602		223.316
	171.303		80.4872	128.932		176.893
			93.1467	144.433		156.353
			103.628	164.48		115.602
			71.559	108.324		130.19
	129.661		103.134	162.487		115.602
			108.822	204.258		242.221
	73.9609		79.9507	125.082		257.864
			77.6946	123.772		139.846
			88.4028	132.67		118.388
			76.2958	111.293		202.656
			62.8897	103.713		163.487
			84.8176	126.378		132.67
			84.4597	126.378		147.779
			79.2257	128.932		181.441
			102.428	151.051		132.67
				103.713		156.353
				100.521		135.104
			98.3349	149.968		103.713
			115.659	177.812		272.61
			100.475	166.45		162.487
			102.362	156.353		118.388
			97.2027	168.397		105.272
			75.0211	125.082		152.126
			89.2925	144.433		164.48
			88.1659	139.846		152.126
			100.349	152.126		126.378
				133.893		159.449
			90.5902	148.878		195.285
			75.0672	117.004		144.433
			86.0979	131.436		137.496
			105.661	172.225		142.158
			93.3659	138.676		90.2703
			94.6262	141.007		168.397
			104.967	154.254		198.595
			81.1985	121.11		125.082
			104.359	151.051		229.791
			96.6063	153.194		173.169
			105.71	148.878		125.082
			80.0606	137.496		92.058
			101.732	148.878		112.748
			85.3523	122.449		218.894
			95.3624	151.051		131.436
			80.8744	122.449		145.557
			88.5376	161.48		158.424
			74.3218	121.11		112.748
			95.1833	143.3		181.441
			106.097	153.194		125.082
			91.8941	135.104		261.628
			78.5616	121.11		127.662
			93.4598	143.3		207.425
			94.5282	135.104		141.007
				109.819		155.307
			62.1442	103.713		109.819
			72.4833	115.602		117.004
			91.9996	157.392		244.897
			96.6122	153.194		123.772
			66.7113	105.272		163.487
			67.3193	108.324		126.378
			72.4113	109.819		126.378
				103.713		168.397
			99.8638	147.779		153.194
			104.183	158.424		206.638
			80.3476	132.67		193.608
			82.5576	143.3		119.757
			81.779	126.378		153.194
			86.5151	119.757		286.599
			95.8704	159.449		122.449
			77.7253	122.449		148.878
			93.8163	139.846		144.433
			87.815	133.893		139.846
			65.6253	105.272		160.468
			93.805	152.126		224.045
			99.183	146.672		112.748
			83.3429	130.19		177.812
			71.2983	114.184		167.427
			106.834	180.541		183.229
			101.561	154.254		93.8117
			77.0659	135.104		157.392
			87.319	133.893		216.649
			62.1733	102.129		105.272
			75.5032	115.602		109.819
			100.585	159.449		111.293
			71.0705	111.293		109.819
			78.269	123.772		193.608
			76.8763	117.004		153.194
			83.6638	127.662		218.148
			101.661	153.194		126.378
			91.6119	136.305		119.757
			94.6475	142.158		112.748
			91.7992	143.3		109.819
			91.7008	158.424		111.293
			87.6625	147.779		111.293
			110.206	164.48		105.272
			89.7774	132.67		126.378
			89.0213	133.893		127.662
			96.1417	139.846		146.672
			75.2617	121.11		138.676
			70.3492	111.293		155.307
			63.6109	103.713		137.496
			75.7292	114.184		158.424
			96.5842	142.158		109.819
			93.6167	139.846		119.757
			105.068	158.424		102.129
			85.3585	123.772		111.293
			79.6636	122.449		162.487
			87.1758	127.662		108.324
			102.202	154.254		109.819
			72.5697	112.748		102.129
			74.2985	112.748		122.449
			88.4319	122.449		106.809
			84.2873	128.932		125.082
			87.6783	131.436		123.772
			91.1949	133.893		97.2241
			83.3516	123.772		185.878
			100.831	142.158		138.676
			97.7472	142.158		141.007
			77.6979	118.388		184.116
			92.9665	133.893		192.765
			112.869	184.999		177.812
			65.1788	103.713		154.254
				119.757		133.893
				118.388		133.893
				147.779		126.378
			75.7964	118.388		157.392
			68.5112	108.324		183.229
			72.0142	119.757		119.757
			106.806	160.468		138.676
			76.7892	119.757		241.547
			130.303	228.368		112.748
			98.4275	148.878		149.968
			87.2625	149.968		130.19
				123.772		122.449
			120.753	175.041		143.3
			71.4241	115.602		166.45
			76.3914	125.082		115.602
			104.441	149.968		175.969
			79.6895	130.19		161.48
				137.496		109.819
			124.732	183.229		224.771
			93.5242	142.158		156.353
			70.0424	112.748		137.496
			115.948	179.636		143.3
			90.5472	137.496		98.8862
				175.969		228.368
			99.9317	156.353		192.765
			94.2298	143.3		117.004
			107.687	157.392		229.791
			89.4996	143.3		141.007
			89.5446	142.158		105.272
			94.0947	138.676		162.487
			83.1685	138.676		155.307
			99.1571	148.878		278.525
			61.8888	111.293		141.007
			103.321	165.468		170.322
			84.101	131.436		137.496
			64.4551	106.809		142.158
			105.885	155.307		138.676
			105.654	159.449		146.672
				102.129		157.392
			108.912	160.468		143.3
			82.3068	130.19		121.11
			104.552	152.126		165.468
			113.011	163.487		106.809
			85.3825	136.305		136.305
			101.506	157.392		136.305
			73.6567	119.757		138.676
			84.1877	135.104		174.107
			77.0769	119.757		192.765
			100.506	144.433		235.396
			71.2856	111.293		106.809
			79.8866	119.757		103.713
			79.8542	119.757		105.272
				102.129		121.11
			105.562	146.672		108.324
			149.168	238.833		123.772
			101.144	149.968		146.672
			98.4852	149.968		160.468
			79.9865	115.602		115.602
			78.1998	123.772		142.158
			98.001	144.433		147.779
			98.7678	154.254		111.293
			75.5511	118.388		173.169
				103.713		103.713
			82.5966	135.104		118.388
			120.203	186.753		98.8862
			95.5959	146.672		125.082
			94.2019	144.433		135.104
			85.5858	133.893		165.468
			99.3489	146.672		149.968
			105.553	156.353		133.893
			91.244	168.397		185.878
			83.0575	122.449		160.468
			98.2037	152.126		151.051
			77.8201	118.388		159.449
			77.1679	127.662		103.713
			71.0017	115.602		125.082
			85.6363	139.846		100.521
			115.454	166.45		115.602
			90.5043	131.436		127.662
			107.596	158.424		169.362
			87.1505	132.67		103.713
			70.6532	114.184		131.436
			108.332	163.487		147.779
			87.4735	152.126		136.305
			75.1336	121.11		281.435
			100.442	153.194		115.602
			90.5159	145.557		175.969
			106.885	162.487		138.676
			72.2202	114.184		155.307
			91.6531	142.158		106.809
			94.9647	142.158		98.8862
				121.11		153.194
			85.8202	136.305		117.004
			70.5393	114.184		212.087
			133.478	224.045		117.004
			86.379	139.846		126.378
			100.258	148.878		115.602
			113.044	173.169		118.388
			87.1582	131.436		131.436
			88.7661	135.104
			76.5042	117.004
			85.5873	139.846
			117.216	194.448
			106.533	158.424
			91.4065	131.436
			80.6945	126.378
			107.651	160.468
			86.0129	133.893
			105.442	176.893
			64.2375	109.819
			103.88	158.424
			74.4742	119.757
			71.6849	117.004
			80.4596	122.449
			94.4119	145.557
			76.089	130.19
			91.8099	135.104
			63.8294	100.521
			92.3512	137.496
				151.051
				139.846
			100.275	147.779
			93.2345	144.433
			71.1927	118.388
			105.602	156.353
			81.2917	123.772
			91.1428	159.449
			158.842	236.777
			88.7531	136.305
			74.3238	121.11
			146.278	213.619
			83.944	137.496
			103.39	152.126
			65.9512	103.713
			84.7139	130.19
			66.1541	106.809
			85.2739	141.007
			70.7912	122.449
			77.7326	122.449
			103.538	157.392
			83.4207	128.932
			70.818	112.748
			75.0518	119.757
			86.7628	139.846
			95.5935	158.424
			88.0394	135.104
			66.8946	130.19
			74.6941	119.757
			79.0885	119.757
			90.6699	151.051
			78.0848	122.449
			72.6835	137.496
			77.5705	123.772
			86.2756	155.307
			79.8115	157.392
			81.2094	122.449
			108.403	160.468
			90.2717	141.007
			85.6906	132.67
			71.9898	105.272
			90.0901	151.051
			88.8234	131.436
			77.3683	126.378
			110.407	161.48
			76.6459	130.19
			87.343	135.104
			105.255	157.392
			88.6706	135.104
			71.8909	114.184
			113.836	173.169
			76.4925	119.757
			76.6086	122.449
			93.4806	133.893
			96.7462	171.276
			96.644	154.254
			67.4347	131.436
			93.0927	143.3
			80.6243	135.104
			86.7674	135.104
			74.8131	115.602
				100.521
			94.9846	180.541
			104.095	158.424
			87.1358	122.449
			87.7308	121.11
			85.7142	132.67
			106.764	164.48
			71.1916	119.757
			74.365	118.388
			83.2178	135.104
			70.8529	111.293
			75.0473	122.449
				92.058
			85.2685	137.496
			104.225	157.392
			77.2511	142.158
			31.6868	146.672
			106.856	173.169
			97.8626	146.672
			98.5337	156.353
			79.1038	123.772
			69.1415	115.602
			93.0443	147.779
			100.052	145.557
			66.8797	108.324
			80.5663	132.67
			83.1366	127.662
			104.117	147.779
			104.492	157.392
			94.3136	144.433
			69.2424	109.819
			92.1238	151.051
			91.2924	132.67
			116.711	170.322
			67.8761	106.809
			75.6473	114.184
			90.7389	151.051
			82.3976	131.436
			76.6146	117.004
			107.231	146.672
			98.521	145.557
			94.384	136.305
			93.4029	136.305
			99.6298	151.051
			106.491	160.468
			63.5353	103.713
			102.756	148.878
			86.7385	128.932
			90.7583	147.779
			109.301	156.353
			100.443	144.433
			78.7122	115.602
			83.147	133.893
			109.446	155.307
			92.366	145.557
			93.8221	139.846
			71.9244	119.757
			80.8151	126.378
			79.4199	127.662
			95.4225	160.468
			98.7067	149.968
			104.367	153.194
			79.6115	123.772
			88.8704	137.496
			95.2309	149.968
				136.305
				109.819
				115.602
				152.126
				121.11
			108.662	156.353
			88.622	136.305
			77.7255	125.082
			73.5804	121.11
			87.8296	133.893
			69.7098	106.809
			86.6669	132.67
			88.1067	130.19
			121.749	208.991
			90.0183	139.846
			102.588	189.353
			97.5559	146.672
			80.9622	123.772
			63.442	103.713
			101.396	148.878
			62.8932	100.521
			64.1129	103.713
			117.042	171.276
			78.437	144.433
			103.941	169.362
			105.23	158.424
			87.5488	152.126
			67.2519	108.324
			74.7723	111.293
			126.181	196.947
				112.748
			87.9035	132.67
			105.854	169.362
			100.888	152.126
			71.8701	112.748
			85.1254	128.932
			82.8803	127.662
			86.0632	135.104
			110.927	167.427
			104.254	160.468
			89.519	137.496
			117.454	184.116
			124.239	227.653
			109.839	183.229
			79.3505	123.772
			121.53	186.753
			77.8725	121.11
			79.1852	125.082
			102.089	163.487
			82.1889	122.449
			103.037	151.051
			118.905	192.765
			77.1977	128.932
			138.677	222.585
			103.839	157.392
			127.561	206.638
			97.0016	145.557
			90.2408	136.305
			118.188	180.541
			64.7223	105.272
			105.329	159.449
				105.272
			72.8641	109.819
			79.5706	122.449
			105.809	144.433
			72.902	111.293
			83.2312	130.19
			121.147	167.427
			129.138	192.765
			63.132	105.272
			93.5932	153.194
			78.7329	123.772
				103.713
			93.0338	136.305
			84.978	130.19
			94.9633	146.672
			87.9958	131.436
			117.234	187.623
			80.2871	125.082
			74.0677	114.184
			104.924	161.48
			103.425	152.126
			82.7498	130.19
			69.4782	123.772
			103.91	149.968
			101.269	152.126
			110.212	161.48
			75.0172	122.449
			99.2395	171.276
			83.506	125.082
			154.915	240.871
			101.919	147.779
			68.1037	106.809
			77.9348	122.449
			73.3831	115.602
			122.359	175.969
			92.6962	136.305
			102.892	160.468
			113.407	166.45
				159.449
			82.7405	122.449
			86.4591	135.104
			111.715	158.424
			77.6832	128.932
			100.953	170.322
			78.3404	125.082
			114.437	161.48
			110.562	169.362
			108.067	172.225
			102.146	169.362
			133.804	207.425
			106.421	157.392
			107.102	193.608
			75.3109	126.378
				95.5331
			102.21	159.449
			64.8336	105.272
			94.6187	149.968
			81.6682	117.004
			88.3863	139.846
			88.1757	135.104
			106.162	160.468
			89.7223	135.104
			106.115	157.392
			79.0647	123.772
			76.093	128.932
			93.7756	158.424
			78.061	112.748
			82.1472	125.082
			86.0664	137.496
			104.549	154.254
			91.0817	136.305
			108.053	163.487
			79.4856	115.602
			112.181	166.45
			97.1893	139.846
			119.454	171.276
			102.595	152.126
			70.054	106.809
			130.337	203.459
				93.8117
			91.7091	144.433
			124.199	179.636
			70.6684	114.184
			93.2761	142.158
			77.621	123.772
				122.449
			76.9498	119.757
			99.9146	167.427
			103.82	189.353
			101.736	152.126
			70.1232	108.324
				139.846
			83.3746	125.082
			69.2807	105.272
			100.664	151.051
			74.0052	119.757
			82.1753	119.757
			96.1081	137.496
			77.1909	123.772
			76.4083	119.757
				112.748
				112.748
				111.293
				117.004
			85.8936	132.67
			111.686	162.487
			106.398	152.126
			72.6687	103.713
			73.0791	112.748
			84.2517	130.19
			77.8486	130.19
			85.5306	128.932
			78.7487	119.757
			108.473	178.726
			100.421	151.051
			71.6815	122.449
			93.5991	144.433
			122.523	170.322
			100.828	147.779
			89.3856	143.3
			54.7922	93.8117
			81.1261	127.662
			93.8609	141.007
			74.7655	122.449
			103.754	145.557
			88.8874	132.67
			91.2675	133.893
			80.7372	131.436
			87.4845	139.846
			71.2792	112.748
			71.5227	111.293
			82.8431	130.19
			102.289	175.969
			101.245	148.878
			96.8203	154.254
			74.2925	108.324
			85.7193	126.378
			106.594	175.041
			117.754	179.636
			102.422	171.276
			102.256	148.878
			77.0518	122.449
			82.3072	122.449
			68.2466	108.324
			98.466	169.362
			79.5956	128.932
			71.8551	111.293
			92.6486	139.846
			91.7191	139.846
			105.514	155.307
			83.5451	135.104
			92.4177	143.3
			101.718	151.051
			75.1767	128.932
			83.0494	130.19
				149.968
			116.01	170.322
			121.871	174.107
			85.3318	132.67
			145.468	213.619
			80.5426	123.772
			92.0862	136.305
			90.9454	158.424
			90.8924	152.126
			92.3302	156.353
			87.4622	135.104
			78.2255	119.757
				132.67
			81.4671	127.662
				111.293
				147.779
			105.863	169.362
			70.7163	115.602
			111.038	153.194
			20961.4	106.809
			73.9254	123.772
			98.2412	152.126
			110.445	167.427
			35900.9	100.521
			104.764	157.392
			89.0468	141.007
			98.997	141.007
			107.244	160.468
			85.8185	131.436
			108.837	163.487
			112.609	167.427
			99.7988	144.433
			71.8009	114.184
			109.627	162.487
			71.2749	125.082
			71.6983	111.293
			121.565	168.397
			89.3646	139.846
			78.0768	126.378
			75.3573	115.602
			94.1652	175.041
			76.5981	123.772
			76.6621	127.662
			97.7821	143.3
			89.0462	137.496
			105.085	151.051
			70.3095	102.129
			117.471	175.041
			88.0315	136.305
			77.1919	122.449
			76.4731	121.11
			114.412	197.772
			67.7216	106.809
			104.985	160.468
			92.9819	143.3
			32481.5	97.2241
			70.4286	114.184
			82.8928	130.19
			96.4671	147.779
				170.322
			127.657	199.414
			75.1649	123.772
			94.801	139.846
			103.949	151.051
			101.889	152.126
			89.9925	148.878
			91.1537	141.007
			86.8655	146.672
				103.713
			92.0336	138.676
			119.269	182.337
			91.7417	141.007
			79.3416	125.082
			98.1139	143.3
			80.9674	135.104
			63.9835	103.713
			77.5773	130.19
			92.277	142.158
			77.6325	125.082
			76.4341	115.602
			59.1203	123.772
			101.63	149.968
			78.5425	128.932
			86.6287	126.378
			110.974	183.229
				119.757
			116.989	172.225
			132.698	186.753
			81.8559	139.846
			96.0677	176.893
			70.8125	121.11
			95.1621	145.557
			102.034	162.487
			94.7019	147.779
			113.845	163.487
			81.8171	122.449
			72.5715	109.819
			100.545	145.557
			79.8384	121.11
			102.546	153.194
			68.4827	103.713
			68.8357	105.272
			91.1135	136.305
			86.0055	133.893
			90.8721	144.433
			99.9549	142.158
			60.716	100.521
			81.3353	115.602
			68.3085	121.11
			66.1528	106.809
			81.7765	132.67
			71.375	114.184
			72.2969	111.293
			80.8195	121.11
			101.065	153.194
			90.4775	137.496
			85.0889	136.305
			81.0194	125.082
			89.2145	138.676
			72.8804	115.602
			73.3188	111.293
			14.1925	108.324
			74.7295	111.293
			120.815	195.285
			98.5169	147.779
			102.079	152.126
			74.0398	118.388
			94.2513	139.846
			85.427	132.67
			68.839	109.819
			74.3313	123.772
			92.5108	142.158
				108.324
			98.1477	146.672
			84.3392	130.19
			66.0796	106.809
			83.9872	135.104
			72.894	119.757
			87.7883	133.893
			125.359	175.969
			77.7264	121.11
			76.8934	122.449
			89.5451	141.007
			87.2908	132.67
			86.9653	133.893
			107.358	162.487
			76.697	126.378
			73.0056	111.293
			67.8011	152.126
			71.8532	126.378
			80.315	126.378
			76.0491	122.449
			103.473	159.449
			83.1012	128.932
			74.4577	123.772
				97.2241
				90.2703
			79.3983	125.082
			1087.04	106.809
			90.6913	138.676
			76.0505	118.388
				97.2241
			104.035	183.229
			71.1496	109.819
			89.3134	130.19
				105.272
			81.458	137.496
			81.1113	133.893
			70.5086	106.809
			72.654	122.449
			70.6687	121.11
			104.525	159.449
			108.197	161.48
			78.0418	117.004
			91.3312	143.3
			86.9732	130.19
			101.888	143.3
				111.293
				105.272
				111.293
			76.4529	126.378
			74.1916	115.602
			86.8957	136.305
			101.978	155.307
			66.2125	105.272
			92.7247	142.158
			117.643	184.116
			108.224	170.322
			107.64	158.424
			99.4772	152.126
			115.51	167.427
			75.0231	119.757
			132.851	199.414
			113.012	166.45
			94.2854	143.3
			84.9127	131.436
			136.37	208.21
			97.9427	145.557
			116.781	170.322
			107.752	159.449
			115.909	165.468
			68.5828	111.293
			91.872	145.557
			102.458	152.126
			110.23	163.487
			87.6653	135.104
			72.3561	117.004
			116.793	171.276
			106.697	159.449
			84.2295	127.662
			83.497	127.662
			93.5679	146.672
			116.978	163.487
			135.558	208.21
			93.4826	144.433
			105.931	153.194
			83.1395	141.007
			92.104	139.846
			74.1467	115.602
			72.508	121.11
			154.834	214.38
			77.5439	122.449
			111.502	174.107
			115.41	184.999
			78.4025	131.436
			107.943	157.392
			101.486	154.254
			65.088	102.129
			122.273	175.969
			86.3749	132.67
			86.1373	131.436
			102.109	152.126
				100.521
			30.681	117.004
			78.9243	118.388
			65.2591	103.713
			89.1219	135.104
			73.8673	121.11
			97.757	145.557
			100.16	148.878
			105.557	170.322
			77.0186	123.772
				105.272
			85.5976	128.932
			87.8228	131.436
			133.401	187.623
			100.342	142.158
			95.7055	144.433
				106.809
			84.7679	133.893
			339.22	100.521
			90.0714	136.305
			68.6909	105.272
			84.0408	133.893
			81.5938	128.932
			69.8439	100.521
			106.212	151.051
			73.8178	119.757
			108.776	163.487
			84.1998	131.436
			106.571	158.424
			73.2359	115.602
			103.648	161.48
			116.855	170.322
			76.2413	118.388
			101.154	152.126
			113.152	164.48
			107.574	158.424
			67.4779	105.272
			105.318	159.449
			123.649	171.276
			109.701	169.362
			66.4576	103.713
			106.143	162.487
			82.0117	128.932
			134.152	205.848
			98.5864	145.557
			93.3867	145.557
			137.433	212.854
			66.8965	105.272
			113.918	168.397
			70.8521	114.184
			92.1787	139.846
			85.9856	128.932
			81.4725	132.67
			123.292	184.999
			84.6433	127.662
			95.773	160.468
			110.688	181.441
			67.0648	114.184
			83.1063	125.082
			123.249	170.322
			76.3698	119.757
			77.1861	119.757
			96.9263	146.672
			150.288	221.116
			76.4574	121.11
			90.1696	154.254
			104.319	159.449
			76.9853	121.11
			94.4004	135.104
			75.203	127.662
			119.903	189.353
			80.1406	125.082
			99.3528	148.878
			89.5075	151.051
			95.5915	146.672
			80.9458	130.19
			87.4502	128.932
			84.3536	135.104
			114.784	158.424
			85.2537	131.436
			146.987	212.854
			112.153	242.221
			103.112	169.362
			68.8399	108.324
				98.8862
			87.0627	136.305
			100.324	152.126
			73.7912	126.378
			78.4789	122.449
			94.7933	137.496
			114.288	169.362
			81.7753	123.772
			96.021	144.433
			98.2009	151.051
			74.547	118.388
			74.9061	114.184
			109.214	161.48
			108.714	171.276
			84.2512	127.662
			105.745	158.424
			63.9762	103.713
			133.368	196.117
			101.487	147.779
			146.094	218.894
			67.8508	105.272
			95.4947	159.449
				103.713
			102.757	158.424
			74.058	115.602
			83.9202	126.378
			89.239	130.19
			106.101	154.254
			90.4162	139.846
			94.9348	155.307
			78.896	130.19
			116.516	180.541
			119.01	193.608
			78.6854	117.004
			111.324	174.107
			93.6847	146.672
			95.2173	143.3
			59.0132	100.521
			71.6629	115.602
			106.092	153.194
			115.868	175.969
			82.7293	131.436
			94.4954	139.846
			108.205	174.107
			73.488	117.004
			68.4184	111.293
			55.6728	108.324
			79.5547	132.67
			71.3189	112.748
			73.4495	115.602
			96.0538	146.672
			82.7016	122.449
			75.6941	118.388
			99.3255	145.557
			-7746.86	114.184
				168.397
				119.757
				128.932
				141.007
				172.225
				143.3
				147.779
				184.116
				114.184
				100.521
			111.31	173.169
			81.3849	126.378
			81.8727	128.932
			23.7812	121.11
			85.6467	128.932
			114.458	178.726
				115.602
			109.076	160.468
			61.5461	100.521
			81.3885	125.082
				103.713
			109.715	161.48
			86.053	130.19
			97.2034	142.158
			80.4407	127.662
			74.6871	121.11
			138.692	205.055
			114.601	185.878
			94.822	145.557
			75.3701	122.449
			89.7465	151.051
			73.6911	108.324
			85.2009	135.104
			96.3184	146.672
			107.885	161.48
			80.8283	121.11
				103.713
			82.9543	125.082
			84.1879	131.436
			103.386	163.487
			88.9765	143.3
			98.9586	149.968
			111.51	166.45
			112.216	174.107
			83.0052	137.496
			110.736	166.45
			85.943	135.104
			95.8401	154.254
			77.6499	130.19
			77.9219	125.082
			83.2005	130.19
			85.5384	139.846
			67.7799	106.809
			93.1999	148.878
			81.6513	122.449
			72.2939	112.748
			85.3372	127.662
				102.129
			97.7341	149.968
			96.3307	148.878
			84.3289	131.436
			89.8741	131.436
			107.22	156.353
			86.075	128.932
			88.6785	136.305
			107.911	168.397
			82.9116	128.932
			89.168	138.676
			94.0925	141.007
			65.2691	103.713
			97.1159	148.878
			100.978	157.392
			82.7344	128.932
			82.6182	135.104
			82.2416	143.3
			92.608	156.353
			76.1467	117.004
			83.816	130.19
			109.185	184.999
			99.2271	141.007
			96.7386	144.433
			74.264	117.004
			79.1934	131.436
			85.2127	126.378
			75.0956	127.662
			68.3706	112.748
			84.0733	143.3
			100.773	158.424
			91.2192	138.676
			67.7177	111.293
			110.32	173.169
			80.4139	133.893
			90.0511	141.007
			80.5968	138.676
			89.0313	145.557
			68.3642	115.602
			85.3761	133.893
			77.4875	119.757
			117.598	171.276
			85.3414	137.496
			67.9667	115.602
			79.853	119.757
				102.129
				168.397
			92.1762	137.496
			88.5732	131.436
			66.0272	108.324
			109.598	165.468
			113.466	168.397
			101.66	147.779
			92.6554	135.104
			81.1486	135.104
			86.968	132.67
			89.8482	138.676
			74.4629	119.757
			67.6436	112.748
			70.1176	108.324
			81.6865	125.082
			72.8669	123.772
			99.5087	185.878
			76.4002	111.293
			85.4247	121.11
			66.3194	103.713
			79.7296	139.846
			90.7684	131.436
			74.4081	122.449
			86.1401	127.662
			126.879	194.448
			75.8801	117.004
			76.3081	126.378
			67.0498	105.272
			66.2738	105.272
			93.0495	143.3
			74.3462	112.748
			63.5378	108.324
			72.5312	112.748
			139074	108.324
				97.2241
			80.046	118.388
			98.4885	146.672
			8.24094	112.748
			80.2356	117.004
			76.3435	111.293
				157.392
			68.9435	108.324
			80.6045	123.772
			73.7398	118.388
			88.8231	141.007
			82.9885	135.104
			100.688	148.878
				123.772
				98.8862
			64.7021	103.713
				103.713
			98.6713	149.968
			91.9659	154.254
			74.6216	131.436
			82.9848	137.496
			79.8062	117.004
			104.483	159.449
			75.6001	114.184
			348.411	93.8117
			83.038	128.932
			101.322	142.158
			73.3911	117.004
			69.7814	118.388
			102.916	154.254
			67.4884	106.809
			99.1027	161.48
			70.7405	114.184
			83.5205	148.878
			94.6237	144.433
			83.5875	125.082
			111.742	174.107
			75.1104	119.757
			78.4113	122.449
			66.5947	109.819
			81.2218	175.969
			18.7409	230.499
			81.2151	119.757
			92.9484	142.158
			106.158	178.726
			71.1387	204.258
			110.475	188.49
			80.3809	125.082
			80.5175	128.932
			77.3912	118.388
			82.4429	122.449
				141.007
			84.6782	138.676
			70.2253	114.184
			107.383	159.449
			104.037	162.487
			76.4265	118.388
				136.305
				111.293
				166.45
				144.433
			75.733	114.184
			85.1057	136.305
			70.1627	106.809
			108.369	161.48
			97.549	153.194
			99.5936	171.276
				108.324
			75.2566	117.004
			69.6798	103.713
			77.2467	114.184
			61.9473	98.8862
			72.5138	108.324
			67.1434	106.809
			99.8488	149.968
			72.6035	127.662
			92.6551	145.557
			91.8443	149.968
			128.98	196.947
			72.1429	112.748
			83.5589	130.19
			104.944	155.307
				100.521
				221.852
			92.2948	142.158
			76.4397	138.676
			73.4028	115.602
			78.8084	123.772
			139.993	250.815
			65.4721	105.272
			89.1505	137.496
				111.293
			96.7927	145.557
			98.1806	149.968
			92.0659	143.3
			90.0358	137.496
			102.744	166.45
			72.2318	112.748
			88.6392	133.893
			115.135	174.107
			81.2653	121.11
			79.3563	147.779
			91.7351	152.126
			105.915	169.362
			96.9855	158.424
			94.0383	147.779
			85.2017	138.676
			75.3479	118.388
			97.0421	157.392
			100.182	146.672
			70.5413	112.748
			82.255	136.305
			86.6942	136.305
				98.8862
			106.898	153.194
			74.976	117.004
			120.429	191.917
			63.2703	105.272
			80.7852	137.496
			114.448	184.999
			108.351	155.307
			69.5284	112.748
			85.4929	141.007
			124.092	182.337
			110.81	157.392
			101.99	144.433
			75.1816	117.004
			64.3626	105.272
			98.2521	148.878
			98.1139	143.3
			82.2114	130.19
			82.55	135.104
			71.2916	109.819
			90.7972	136.305
			73.7693	119.757
			69.3411	109.819
			93.1466	147.779
				147.779
			75.1505	128.932
			125.982	205.848
			95.6137	136.305
			109.13	160.468
			104.694	153.194
			99.523	156.353
			79.3382	126.378
			35368.9	95.5331
			78.3731	126.378
			87.9466	132.67
			68.9489	111.293
			79.3549	122.449
			66.509	112.748
			72.819	118.388
			66.1124	105.272
			77.0676	114.184
			86.3537	132.67
			60.6409	102.129
			119.122	197.772
			83.0447	118.388
			-7.97857e+06	98.8862
			83.6486	136.305
			119.953	169.362
			64.4407	102.129
			102.744	170.322
			108.148	174.107
			102.974	145.557
			80.8158	123.772
			83.2142	151.051
				130.19
			95.4422	148.878
			93.5644	147.779
			144.899	211.317
			60.3197	100.521
				139.846
			79.032	119.757
			84.7855	127.662
			83.9673	121.11
			104.995	161.48
			75.4297	123.772
			84.6795	143.3
			68.3272	108.324
			106.529	161.48
			59.6728	108.324
			74.4654	119.757
			80.5146	119.757
			92.8429	136.305
			76.8893	118.388
			77.6788	131.436
			67.8603	106.809
			97.0448	148.878
			79.5388	114.184
			73.922	121.11
			113.411	169.362
			92.5017	151.051
			82.4283	126.378
			84.4712	133.893
			63.4991	108.324
			98.5693	152.126
			88.0035	143.3
			107.382	174.107
			76.5928	126.378
			82.3796	132.67
			66.193	106.809
			64.8507	100.521
			119.867	185.878
			72.0531	109.819
			63.7868	105.272
			66.4128	102.129
			94.3154	145.557
			64.522	108.324
			86.5767	128.932
			117.169	170.322
			96.2061	149.968
			98.2455	158.424
			83.3483	141.007
			86.4324	141.007
			103.33	157.392
			80.3763	122.449
				132.67

## Sheet: B Yamagata
Filamentous length	Filamentous persistence length	Small filamentous length	Large spherical ELM radius	Large spherical equivalent radius	Small spherical radius	Unknown equivalent radius	Rod length	Rod diameter
303.529	566.373	173.255		98.8862	100.521	103.713
290.274	1643.66	96		102.129	90.2703	143.3
199.765		77.2548	71.1952	111.293	98.8862	142.158
405.019	945.631	250.51		97.2241	98.8862	98.8862
327.765		373.019		100.521	92.058	152.126
271.529		128	64.1275	100.521	98.8862	131.436
399.529	26.0625	186.51		100.521	93.8117	98.8862
437.019	9296.78	277.019		98.8862	103.713	144.433
245.019		186.51		100.521	100.521	131.436
226.274		263.765		100.521	97.2241	97.2241
250.51	77.4294	128	66.4606	100.521	100.521	105.272
237.255		141.255		98.8862	102.129	105.272
226.274	177.673	199.765	62.0823	100.521	93.8117	93.8117
386.274	50420.9	199.764	65.9245	102.129	90.2703	109.819
258.274	22464.4	64		97.2241	102.129	108.324
245.019		205.255	57.8175	97.2241	92.058	173.169
322.274	120.733	128		90.2703	95.5331	135.104
444.784	1045.01	173.255		100.521	93.8117	170.322
263.765		282.51		98.8862	92.058	102.129
231.765	6655.7	141.255	74.0851	118.388	97.2241	105.272
218.51	117.58	64	63.6606	95.5331	95.5331	100.521
282.51	155.844	173.255	63.664	102.129	97.2241	97.2241
277.019		77.2548		103.713	106.809	95.5331
487.764	127.354		67.184	103.713	95.5331	95.5331
365.255	18.5263			102.129	95.5331	90.2703
431.529	1118.42		73.6615	115.602	102.129	108.324
341.019	101.653			93.8117	92.058	105.272
245.019	97.336			93.8117	92.058	95.5331
431.529	416.401		107.942	169.362	92.058	102.129
359.764	82.37			103.713	92.058	92.058
327.764	26.8849			102.129	93.8117	102.129
218.51	190.157			93.8117	97.2241	141.007
444.784	156.22			103.713	95.5331	90.2703
535.293	1235.7		87.6736	135.104	92.058	105.272
231.765				100.521	93.8117	103.713
231.765	65535		78.494	118.388	95.5331	95.5331
527.529	373.344			92.058	92.058	179.636
277.019	49.0793		67.5026	106.809	92.058	103.713
213.019			59.6475	93.8117	95.5331	98.8862
380.784	16327.9			100.521	90.2703	100.521
335.529	25273			111.293	102.129	102.129
327.764	29.5383			95.5331	92.058	97.2241
290.274	129.469		64.1574	98.8862	108.324	148.878
213.019	29.7759		63.4414	102.129	97.2241	151.051
303.529	8.15004e+06			105.272	97.2241	111.293
354.274	480.716			90.2703	102.129	135.104
141.255				100.521	95.5331	132.67
412.784	973.025		62.3177	100.521	93.8117	100.521
373.019			66.7702	103.713	93.8117	130.19
575.058	104.372		66.0197	102.129	92.058	152.126
399.529	43.0473			90.2703	97.2241	93.8117
522.039	114.516		57.4447	90.2703	93.8117	95.5331
269.255	65535			97.2241	102.129	142.158
309.019	28.8779			97.2241	108.324	98.8862
503.293	53.9864			98.8862	93.8117	103.713
346.51	950.487			95.5331	92.058	105.272
290.274	1.01083e+06			100.521	92.058	138.676
367.529	245.922		64.9326	98.8862	100.521	137.496
263.765				98.8862	93.8117	98.8862
295.764	39.6155			93.8117	92.058	95.5331
250.51			64.2253	105.272	97.2241	125.082
173.255				93.8117	90.2703	100.521
341.019	206.563		62.4848	97.2241	97.2241	98.8862
593.803	104.657			103.713	98.8862	180.541
167.764			82.5363	123.772	92.058	173.169
245.019	24.6603			98.8862	100.521	111.293
245.019				97.2241	93.8117	95.5331
277.019			65.8586	103.713	90.2703	160.468
322.274	101.63			97.2241	95.5331	125.082
290.274			61.2844	98.8862	100.521	133.893
290.274	2427.88		65.5147	103.713	90.2703	103.713
122.51				105.272	97.2241	103.713
354.274	446.332		66.337	103.713	100.521	138.676
218.51				100.521	92.058	103.713
380.784	50.9628			95.5331	100.521	105.272
295.764			62.7969	98.8862	95.5331	95.5331
327.765			65.619	100.521	102.129	103.713
258.274				92.058	92.058	103.713
199.765	84.3565		66.1581	100.521	93.8117	137.496
128				92.058	102.129	102.129
205.255			65.7671	102.129	92.058	132.67
231.765				95.5331	98.8862	105.272
231.765	33.0045			100.521	95.5331	142.158
748.313	395.647			98.8862	93.8117	144.433
373.019	1389.56		64.3333	100.521	95.5331	93.8117
327.764	42.8491			95.5331	93.8117	103.713
282.51	30.4067			93.8117	92.058	102.129
199.765			60.1559	92.058	98.8862	153.194
309.019	101.566		61.0094	98.8862	92.058	98.8862
263.765	87.769		63.273	95.5331	95.5331	102.129
218.51			61.0375	98.8862	100.521	112.748
295.764			63.9984	98.8862	97.2241	111.293
290.274				98.8862	93.8117	93.8117
186.51			61.2659	98.8862	93.8117	106.809
314.51	80.2815		63.3167	100.521	100.521	103.713
263.765				100.521	92.058	93.8117
650.039	539.108			92.058	93.8117	98.8862
373.019				97.2241	93.8117	123.772
263.765			64.0216	98.8862	98.8862	103.713
327.764	71.5387			95.5331	92.058	138.676
167.764	181.449			105.272	90.2703	141.007
314.51				105.272	95.5331	98.8862
327.764			65.7762	102.129	92.058	98.8862
322.274	58.6637			100.521	93.8117	105.272
463.529	50.9		62.3565	98.8862	95.5331	109.819
277.019	22.9149			97.2241	97.2241	97.2241
309.019	27.9418			100.521	95.5331	97.2241
271.529	1.61899e+07		5.15454e+73	93.8117	98.8862	103.713
295.764	53.4195		88.682	131.436	97.2241	146.672
354.274	115.357			95.5331	97.2241	135.104
282.51				93.8117	97.2241	98.8862
250.51				92.058	92.058	103.713
245.019				98.8862	95.5331	136.305
199.764			59.8752	97.2241	102.129	102.129
256	20.7711		62.3379	100.521	95.5331	95.5331
213.019				103.713	93.8117	138.676
226.274	642322			105.272	93.8117	98.8862
367.529	437.469			100.521	100.521	144.433
277.019	34.1305		59.4286	93.8117	92.058	103.713
405.019	95512.5		61.3605	97.2241	97.2241	90.2703
327.765	99.9717			95.5331	92.058	97.2241
237.255				92.058	90.2703	102.129
327.765	49.4167		63.7349	100.521	98.8862	126.378
322.274	24.0862			103.713	97.2241	102.129
231.764				97.2241	93.8117	90.2703
245.019	96.3694			95.5331	90.2703	143.3
258.274	16.5137		64.4518	102.129	97.2241	105.272
282.51	201.601		67.1697	105.272	97.2241	112.748
322.274				93.8117	98.8862	105.272
554.039	32156.4			93.8117	90.2703	158.424
335.529	326.662			92.058	95.5331	103.713
218.51			61.7507	93.8117	100.521	102.129
237.255			64.9008	102.129	93.8117	92.058
269.255	28.5613		65.941	103.713	92.058	145.557
245.019				100.521	90.2703	100.521
282.51				98.8862	92.058	98.8862
199.765				102.129	90.2703	132.67
373.019	57.1066		69.988	112.748	92.058	103.713
620.313	29.0901		62.2133	95.5331	93.8117	93.8117
391.764	6.48768e+06			97.2241	93.8117	100.521
341.019	43.7346		55.6806	95.5331	90.2703	167.427
373.019	2704.96		69.4383	103.713	90.2703	106.809
727.293	43.9636		58.8748	93.8117	90.2703	100.521
277.019				97.2241	95.5331	103.713
250.51				97.2241	93.8117	105.272
295.764	16858.8			95.5331	100.521	106.809
359.764	77.4434			106.809	90.2703	135.104
290.274	67.8062			102.129	100.521	133.893
218.51				98.8862	93.8117	135.104
205.255			74.7735	122.449	93.8117	103.713
224	39.3456		69.9294	108.324	95.5331	106.809
463.529	1003.86		62.205	100.521	98.8862	98.8862
367.529	35919.9			100.521	98.8862	103.713
932.548	235.808			100.521	95.5331	174.107
309.019			62.8991	100.521	90.2703	92.058
237.255	49.2267			100.521	97.2241	125.082
141.255				95.5331	92.058	105.272
391.764	300.672		63.3627	97.2241	92.058	102.129
277.019	6.55022		62.5922	97.2241	90.2703	97.2241
199.764				98.8862	90.2703	103.713
231.765	21.2688			97.2241	90.2703	105.272
231.765	217719			93.8117	92.058	121.11
90.5097	200.121		64.272	103.713	95.5331	105.272
455.764	71.7774		67.9836	105.272	100.521	100.521
322.274	78080.3		58.6241	93.8117	93.8117	141.007
199.765	60.2936			92.058	90.2703	105.272
359.764	65535			102.129	102.129	102.129
282.51	193.508			103.713	92.058	95.5331
322.274	57.9572			100.521	90.2703	123.772
437.019	107.29			97.2241	98.8862	103.713
181.019				97.2241	93.8117	105.272
322.274				93.8117	98.8862	105.272
348.784	50.4792		62.003	95.5331	97.2241	141.007
301.255	118.245		60.0313	98.8862	95.5331	128.932
391.764	92.2425			90.2703	102.129	130.19
199.765			60.4771	95.5331	98.8862	136.305
540.784	22.9623			97.2241	102.129	93.8117
346.51	169.141			93.8117	98.8862	93.8117
231.765			61.9887	97.2241	93.8117	156.353
295.764			70.8108	108.324	105.272	103.713
277.019	118.078			97.2241	93.8117	125.082
258.274	17527.3		68.3648	106.809	95.5331	103.713
412.784	982.372			98.8862	95.5331	108.324
335.529	225.352		65.411	100.521	100.521	135.104
			59.9736	97.2241	90.2703	132.67
				95.5331	95.5331	103.713
				100.521	93.8117	102.129
			66.4948	105.272	92.058	161.48
				95.5331	95.5331	117.004
				93.8117	95.5331	147.779
			63.7931	98.8862	100.521	128.932
				93.8117	100.521	102.129
				97.2241	95.5331	102.129
				98.8862	100.521	109.819
				90.2703	92.058	147.779
			72.0966	111.293	103.713	95.5331
				93.8117	95.5331	100.521
			78.564	125.082	97.2241	100.521
			74.0976	114.184	92.058	105.272
				93.8117	90.2703	102.129
			67.2797	100.521	97.2241	156.353
				97.2241	98.8862	93.8117
			68.7226	105.272	100.521	112.748
				95.5331	93.8117	93.8117
			68.0993	106.809	95.5331	143.3
			67.7567	102.129	97.2241	111.293
			65.3874	98.8862	103.713	95.5331
			67.9669	102.129	93.8117	121.11
			68.3463	108.324	100.521	103.713
				103.713	103.713	95.5331
			68.3586	119.757	95.5331	133.893
			-10653.2	102.129	92.058	122.449
			67.1501	105.272	95.5331	95.5331
				97.2241	100.521	105.272
			86.8427	127.662	102.129	141.007
			65.9732	100.521	98.8862	135.104
				92.058	95.5331	136.305
				103.713	97.2241	95.5331
			65.9932	103.713	90.2703	105.272
			64.939	103.713	100.521	128.932
				95.5331	92.058	102.129
			-4.03912e+95	95.5331	100.521	100.521
			65.3218	102.129	98.8862	102.129
			65.2193	100.521	93.8117	105.272
			62.2796	95.5331	98.8862	145.557
			72.3348	117.004	93.8117	145.557
				98.8862	93.8117	147.779
			69.1337	105.272	90.2703	98.8862
				102.129	100.521	105.272
				98.8862	90.2703	109.819
				106.809	98.8862	151.051
				93.8117	90.2703	98.8862
				103.713	95.5331	102.129
				93.8117	90.2703	149.968
			65.1516	100.521	93.8117	125.082
			67.6538	106.809	103.713	111.293
				100.521	95.5331	136.305
			70.2739	109.819	97.2241	98.8862
			64.4775	97.2241	90.2703	117.004
				103.713	95.5331	126.378
			66.1759	102.129	98.8862	95.5331
				102.129	90.2703	159.449
			66.5885	106.809	97.2241	102.129
			64.7529	100.521	92.058	127.662
			80.7213	128.932	103.713	133.893
				106.809	90.2703	98.8862
			68.4417	109.819	93.8117	136.305
			62.3837	98.8862	97.2241	92.058
			62.3759	97.2241	97.2241	162.487
				105.272	93.8117	156.353
				95.5331	92.058	143.3
				97.2241	97.2241	145.557
			60.2276	95.5331	90.2703	102.129
			57.9205	93.8117	93.8117	102.129
				103.713	95.5331	95.5331
				97.2241	98.8862	143.3
			65.4683	100.521	90.2703	103.713
				97.2241	97.2241	98.8862
				95.5331	97.2241	100.521
				95.5331	92.058	100.521
				102.129	97.2241	97.2241
			68.3505	108.324	98.8862	95.5331
				103.713	97.2241	212.854
			67.7666	105.272	90.2703	92.058
				93.8117	102.129	103.713
				100.521	98.8862	151.051
				102.129	92.058	148.878
			57.7975	90.2703	103.713	118.388
			66.7046	105.272	95.5331	119.757
				97.2241	95.5331	122.449
				97.2241	103.713	95.5331
			90.3283	136.305	100.521	141.007
				97.2241	97.2241	105.272
				103.713	90.2703	103.713
				105.272	100.521	100.521
				98.8862	95.5331	133.893
				95.5331	97.2241	95.5331
				98.8862	95.5331	95.5331
			65.046	102.129	97.2241	115.602
				95.5331	95.5331	92.058
			68.9115	105.272	100.521	133.893
			65.158	98.8862	100.521	100.521
				97.2241	93.8117	136.305
				98.8862	92.058	92.058
			63.8994	102.129	93.8117	100.521
				103.713	100.521	100.521
				102.129	92.058	97.2241
			64.5865	102.129	95.5331	148.878
				92.058	92.058	102.129
			74.6057	123.772	97.2241	148.878
				100.521	97.2241	130.19
				93.8117	105.272	103.713
			61.5754	97.2241	93.8117	166.45
				102.129	97.2241	127.662
			68.5706	106.809	95.5331	102.129
			73.8501	115.602	93.8117	100.521
			67.7528	106.809	93.8117	102.129
			64.3692	102.129	90.2703	100.521
			63.7481	98.8862	93.8117	137.496
			67.2143	106.809	92.058	136.305
			64.6624	100.521	92.058	144.433
				95.5331	90.2703	173.169
				103.713	95.5331	106.809
			63.1559	100.521	93.8117	130.19
			63.0019	97.2241	93.8117	102.129
				95.5331	90.2703	97.2241
			157.926	221.116	95.5331	130.19
			63.0232	103.713	93.8117	126.378
			63.903	98.8862	93.8117	98.8862
			67.4808	105.272	100.521	106.809
				93.8117	98.8862	105.272
			62.9241	103.713	90.2703	106.809
			62.1176	98.8862	93.8117	130.19
				90.2703	93.8117	102.129
				95.5331	92.058	100.521
			68.7082	106.809	100.521	98.8862
				95.5331	93.8117	105.272
			65.326	102.129	97.2241	93.8117
			65.8678	103.713	95.5331	105.272
			65.0537	100.521	105.272	133.893
				95.5331	103.713	144.433
			60.0307	95.5331	90.2703	105.272
				106.809	93.8117	100.521
				102.129	98.8862	131.436
				90.2703	95.5331	125.082
				93.8117	105.272	103.713
			70.8605	109.819	98.8862	102.129
			59.0566	93.8117	98.8862	100.521
			65.5673	100.521	102.129	92.058
				92.058	95.5331	118.388
			65.8058	102.129	90.2703	100.521
				93.8117	97.2241	93.8117
				93.8117	90.2703	103.713
			66.5398	105.272	98.8862	95.5331
				95.5331	102.129	106.809
				93.8117	98.8862	125.082
			65.0387	105.272	102.129	93.8117
				98.8862	93.8117	138.676
				97.2241	97.2241	90.2703
				95.5331	100.521	105.272
			64.2629	97.2241	97.2241	106.809
			67.2826	103.713	100.521	142.158
				109.819	93.8117	148.878
			65.3715	103.713	92.058	106.809
				95.5331	93.8117	102.129
			64.4191	98.8862	95.5331	139.846
				93.8117	95.5331	103.713
				98.8862	97.2241	102.129
			67.7139	109.819	102.129	106.809
			61.6718	97.2241	92.058	100.521
			62.9068	95.5331	102.129	98.8862
			70.4089	109.819	97.2241	157.392
			63.9982	97.2241	98.8862	151.051
			73.3804	109.819	102.129	103.713
			62.4355	97.2241	98.8862	106.809
			60.2783	95.5331	98.8862	139.846
			93.3816	136.305	93.8117	102.129
			3.74416e+21	98.8862	92.058	102.129
			64.5275	98.8862	102.129	108.324
			87.6539	133.893	98.8862	109.819
			69.6204	106.809	95.5331	95.5331
			66.9669	109.819	90.2703	105.272
			63.4873	102.129	100.521	100.521
				95.5331	97.2241	106.809
			67.8092	105.272	92.058	102.129
				93.8117	100.521	102.129
			83.0832	130.19	95.5331	105.272
			67.782	105.272	92.058	132.67
				97.2241	102.129	103.713
			11702.7	98.8862	95.5331	125.082
				95.5331	90.2703	100.521
				98.8862	93.8117	103.713
				95.5331	90.2703	92.058
			60.9732	93.8117	102.129	105.272
				93.8117	102.129	114.184
				92.058	98.8862	95.5331
				93.8117	93.8117	100.521
			62.3261	97.2241	102.129	102.129
				100.521	102.129	93.8117
			64.8989	103.713	97.2241	102.129
			61.1701	98.8862	92.058	102.129
			61.9776	98.8862	92.058	149.968
			64.8415	102.129	93.8117	108.324
				92.058	100.521	98.8862
				98.8862	93.8117	108.324
				98.8862	97.2241	103.713
				90.2703	93.8117	98.8862
				92.058	90.2703	103.713
				92.058	95.5331	93.8117
				105.272	92.058	106.809
			65.2481	98.8862	92.058	108.324
			62.7146	100.521	97.2241	170.322
			57.5148	90.2703	95.5331	105.272
			69.191	108.324	93.8117	105.272
				92.058	95.5331	142.158
				100.521	95.5331	90.2703
				98.8862	93.8117	143.3
			62.1142	97.2241	92.058	149.968
			81.0228	128.932	102.129	137.496
			64.1071	98.8862	93.8117	106.809
				102.129	103.713	127.662
				98.8862	97.2241	97.2241
				95.5331	97.2241	103.713
				95.5331	93.8117	92.058
				103.713	92.058	105.272
				100.521	93.8117	102.129
				105.272	102.129	111.293
			66.5525	103.713	90.2703	98.8862
			70.8121	106.809	92.058	102.129
			66.8344	103.713	92.058	100.521
			62.3041	95.5331	98.8862	204.258
			62.9434	98.8862	98.8862	98.8862
				102.129	103.713	106.809
				95.5331	105.272	105.272
			84.4469	127.662	100.521	103.713
			1.93367e+37	98.8862	95.5331	131.436
				97.2241	95.5331	142.158
				98.8862	100.521	167.427
			62.9759	98.8862	100.521	95.5331
				98.8862	95.5331	100.521
			64.1418	102.129	95.5331	121.11
			64.5659	98.8862	93.8117	151.051
				118.388	102.129	131.436
			72.4611	115.602	98.8862	95.5331
			61.6474	97.2241	97.2241	100.521
			67.2597	98.8862	102.129	109.819
				93.8117	103.713	102.129
			66.4567	100.521	93.8117	98.8862
				102.129	92.058	142.158
				93.8117	90.2703	98.8862
				97.2241	92.058	191.066
			66.2559	105.272	98.8862	98.8862
				95.5331	97.2241	117.004
			76.3237	118.388	97.2241	93.8117
			60.6723	97.2241	100.521	108.324
			65.7614	100.521	97.2241	106.809
				102.129	93.8117	136.305
				98.8862	102.129	123.772
				95.5331	90.2703	95.5331
			64.8963	100.521	95.5331	95.5331
				95.5331	102.129	100.521
			65.4486	100.521	97.2241	109.819
			61.5994	97.2241	93.8117	95.5331
				97.2241	98.8862	106.809
				98.8862	92.058	158.424
				100.521	97.2241	98.8862
				95.5331	92.058	95.5331
			62.2786	97.2241	92.058	105.272
			1.25061e+139	93.8117	92.058	97.2241
			62.0734	97.2241	92.058	132.67
			66.2511	98.8862	95.5331	126.378
			64.4662	97.2241	95.5331	97.2241
				98.8862	93.8117	102.129
			72.7383	112.748	98.8862	100.521
			61.2333	95.5331	102.129	139.846
			61.2379	97.2241	95.5331	95.5331
				92.058	98.8862	93.8117
			64.7402	100.521	97.2241	103.713
				98.8862	100.521	93.8117
				98.8862	100.521	114.184
			70.1055	108.324	93.8117	102.129
			65.1748	100.521	100.521	98.8862
			65.8943	103.713	90.2703	147.779
			65.6856	105.272	98.8862	103.713
			65.6646	103.713	100.521	100.521
			60.1187	98.8862	100.521	133.893
			67.7072	108.324	93.8117	136.305
				90.2703	97.2241	95.5331
			63.6623	100.521	95.5331	136.305
				98.8862	98.8862	108.324
			62.4684	100.521	92.058	155.307
				97.2241	98.8862	100.521
				161.48	95.5331	138.676
				103.713	98.8862	138.676
				103.713	95.5331	100.521
				97.2241	97.2241	98.8862
				95.5331	97.2241	109.819
			71.8558	111.293	93.8117	97.2241
				95.5331	95.5331	102.129
				93.8117	100.521	130.19
				97.2241	90.2703	146.672
				103.713	92.058	139.846
			74.1586	115.602	97.2241	102.129
			69.7141	109.819	100.521	165.468
			71.7364	108.324	92.058	92.058
			66.1167	106.809	95.5331	138.676
				97.2241	98.8862
				100.521	103.713
			69.5369	106.809	95.5331
			67.227	102.129	90.2703
			66.2365	100.521	98.8862
				93.8117	98.8862
				103.713	98.8862
				95.5331	97.2241
				92.058	93.8117
				102.129	92.058
				100.521	100.521
			65.6557	98.8862	97.2241
			89.3925	132.67	93.8117
			63.0752	98.8862	95.5331
			63.7904	103.713	90.2703
			63.6731	98.8862	102.129
			69.6631	105.272	100.521
			66.0336	105.272	100.521
				106.809	98.8862
				100.521	103.713
			83.701	127.662	90.2703
			63.5133	100.521	102.129
			62.8872	100.521	90.2703
				98.8862	97.2241
				98.8862	93.8117
			60.2003	97.2241	98.8862
				106.809	93.8117
			77.6816	122.449	98.8862
			60.5412	93.8117	97.2241
				97.2241	97.2241
			69.0003	109.819	102.129
			64.7355	100.521	93.8117
			98.102	148.878	92.058
				108.324	98.8862
			66.1441	103.713	98.8862
			64.9733	102.129	97.2241
				95.5331	90.2703
				102.129	98.8862
				102.129	95.5331
			70.41	108.324	98.8862
			66.8186	100.521	102.129
			70.3254	108.324	97.2241
			66.5973	102.129	95.5331
				95.5331	98.8862
				95.5331	90.2703
				93.8117	97.2241
			63.729	100.521	93.8117
			67.2809	106.809	98.8862
				95.5331	95.5331
			66.4827	100.521	98.8862
				106.809	105.272
				100.521	90.2703
			67.4513	102.129	100.521
			69.5796	106.809	92.058
			73.1929	109.819	97.2241
				97.2241	90.2703
			61.0405	100.521	100.521
			69.0082	103.713	90.2703
				102.129	100.521
			65.0816	100.521	103.713
			68.0974	106.809	98.8862
				105.272	98.8862
			61.6422	93.8117	95.5331
			69.7382	109.819	93.8117
			62.4858	100.521	95.5331
			68.8868	109.819	97.2241
				95.5331	98.8862
			64.2045	98.8862	102.129
			61.1259	97.2241	95.5331
				97.2241	100.521
			60.5103	98.8862	105.272
			65.7247	100.521	100.521
			68.4229	105.272	98.8862
			61.3787	95.5331	98.8862
				105.272	102.129
			88.3644	132.67	90.2703
			91.1832	144.433	97.2241
				93.8117	90.2703
			65.6909	100.521	93.8117
				103.713	102.129
			66.9508	103.713	100.521
			61.6469	98.8862	95.5331
			-10425.6	98.8862	98.8862
				106.809	97.2241
				98.8862	100.521
				97.2241	90.2703
			67.8488	103.713	97.2241
				95.5331	92.058
				102.129	98.8862
				93.8117	95.5331
			73.5674	121.11	93.8117
				97.2241	90.2703
			71.1499	109.819	97.2241
			65.545	102.129	93.8117
			64.8481	103.713	95.5331
				95.5331	90.2703
				95.5331	93.8117
				97.2241	92.058
			64.6456	102.129	92.058
			68.4133	108.324	102.129
			69.2389	108.324	98.8862
				95.5331	92.058
				97.2241	97.2241
			11938.4	97.2241	100.521
			65.9718	100.521	95.5331
			83.6208	131.436	92.058
			66.1256	102.129	97.2241
				97.2241	95.5331
			64.3081	98.8862	93.8117
				95.5331	93.8117
				100.521	95.5331
				97.2241	97.2241
			100.534	145.557	97.2241
				95.5331	90.2703
			67.8643	105.272	93.8117
			62.4872	95.5331	100.521
				100.521	92.058
				97.2241	93.8117
			66.2917	106.809	93.8117
			71.0231	125.082	92.058
				100.521	102.129
			66.715	100.521	93.8117
			67.1013	106.809	93.8117
				97.2241	93.8117
			64.0366	100.521	98.8862
			65.3413	100.521	95.5331
			82.7551	122.449	97.2241
			61.7663	100.521	98.8862
			60.7623	97.2241	98.8862
				103.713	92.058
				98.8862	90.2703
			67.7757	103.713	92.058
			62.1939	97.2241	98.8862
			70.6042	112.748	93.8117
				95.5331	93.8117
			61.993	100.521	100.521
				97.2241	92.058
				95.5331	92.058
			65.5011	98.8862	90.2703
				93.8117	100.521
			66.4622	100.521	93.8117
			64.8953	100.521	93.8117
				93.8117	100.521
				105.272	90.2703
			59.1654	95.5331	90.2703
			60.7208	95.5331	98.8862
				97.2241	97.2241
				103.713	97.2241
			67.9891	105.272	95.5331
				98.8862	97.2241
				95.5331	95.5331
				93.8117	90.2703
				106.809	92.058
				97.2241	93.8117
				106.809	98.8862
			73.961	111.293	98.8862
				100.521	95.5331
				98.8862	92.058
				105.272	95.5331
				95.5331	95.5331
			63.4322	100.521	97.2241
			68.706	106.809	100.521
			64.8166	100.521	90.2703
				98.8862	92.058
				98.8862	97.2241
			68.8443	106.809	95.5331
			68.937	105.272	92.058
				93.8117	98.8862
			64.161	100.521	97.2241
				95.5331	102.129
				102.129	98.8862
			63.9933	98.8862	92.058
			66.7511	102.129	92.058
			7.5489e+07	98.8862	103.713
			67.5926	103.713	90.2703
			72.1873	109.819	93.8117
				102.129	93.8117
			66.2127	102.129	92.058
				97.2241	90.2703
			60.755	100.521	93.8117
			64.6331	100.521	103.713
				97.2241	90.2703
				92.058	100.521
			72.8482	117.004	102.129
			66.6303	103.713	95.5331
				103.713	100.521
				97.2241	98.8862
				93.8117	92.058
			69.4106	106.809	97.2241
				102.129	90.2703
			65.7897	102.129	100.521
			64.3837	100.521	102.129
				97.2241	95.5331
				95.5331	93.8117
			66.3876	102.129	98.8862
				95.5331	92.058
			83.1319	121.11	97.2241
			71.7571	109.819	97.2241
				106.809	97.2241
				105.272	95.5331
				102.129	95.5331
				98.8862	95.5331
				93.8117	93.8117
			61.4869	95.5331	98.8862
			69.7718	103.713	93.8117
				100.521	90.2703
				100.521	102.129
			64.0578	103.713	93.8117
				98.8862	95.5331
				97.2241	90.2703
			61.2624	97.2241	102.129
				103.713	97.2241
			66.3543	103.713	92.058
			67.2158	102.129	90.2703
			63.1254	100.521	93.8117
				103.713	95.5331
				95.5331	100.521
			61.0603	98.8862	103.713
				103.713	93.8117
			86.4692	132.67	97.2241
			64.108	100.521	92.058
			64.4482	102.129	100.521
			90.5704	135.104	95.5331
			65.2912	100.521	100.521
			76.1801	121.11	90.2703
				100.521	98.8862
			68.0327	102.129	100.521
				98.8862	92.058
			63.2519	102.129	92.058
				97.2241	93.8117
				105.272	97.2241
			70.1942	109.819	92.058
				93.8117	92.058
				106.809	97.2241
			65.4609	98.8862	102.129
				90.2703	100.521
			81.2967	118.388	97.2241
			77.4035	121.11	105.272
				100.521	90.2703
				98.8862	100.521
			64.0061	98.8862	97.2241
			63.9717	100.521	92.058
				98.8862	95.5331
				98.8862	92.058
				97.2241	93.8117
			65.1659	102.129	97.2241
				95.5331	95.5331
			64.6101	103.713	97.2241
				108.324	93.8117
				95.5331	92.058
				102.129	100.521
				102.129	98.8862
			64.7484	106.809	93.8117
				90.2703	93.8117
				95.5331	98.8862
				97.2241	102.129
				92.058	93.8117
				95.5331	98.8862
				100.521	92.058
				103.713	102.129
				98.8862	98.8862
				100.521	93.8117
			76.2502	121.11	95.5331
			67.9532	105.272	95.5331
			66.2163	103.713	105.272
			68.0643	105.272	92.058
				95.5331	93.8117
				102.129	97.2241
				97.2241	92.058
				95.5331	92.058
			85.4622	122.449	97.2241
				100.521	90.2703
				97.2241	93.8117
				97.2241	102.129
			67.4547	105.272	97.2241
			61.6425	95.5331	95.5331
			63.103	98.8862	92.058
			66.6405	102.129	93.8117
				102.129	100.521
			62.076	97.2241	90.2703
				97.2241	93.8117
				98.8862	92.058
			65.3101	102.129	103.713
			67.1063	105.272	92.058
			73.3419	114.184	95.5331
				102.129	95.5331
				100.521	93.8117
			63.1756	102.129	90.2703
				95.5331	92.058
			68.6918	108.324	97.2241
				106.809	97.2241
				93.8117	92.058
				93.8117	100.521
				100.521	95.5331
			61.0295	97.2241	93.8117
			62.6134	97.2241	93.8117
				98.8862	95.5331
			62.2946	98.8862	93.8117
				98.8862	93.8117
			93.2439	133.893	90.2703
			-791371	97.2241	93.8117
			79.1122	122.449	93.8117
			60.4955	97.2241	93.8117
			62.9422	98.8862	93.8117
				92.058	90.2703
				103.713	90.2703
			63.5839	98.8862	90.2703
			64.2447	100.521	90.2703
				103.713	95.5331
			69.5947	106.809	93.8117
			65.4288	100.521	90.2703
				98.8862	102.129
			67.8212	102.129	95.5331
			63.7555	100.521	98.8862
			60.6562	98.8862	93.8117
			67.1825	105.272	97.2241
				102.129	98.8862
			62.4796	100.521	90.2703
			66.4469	103.713	90.2703
				93.8117	102.129
			65.6689	103.713	100.521
			57.5894	93.8117	92.058
			63.8261	98.8862	93.8117
			70.5969	108.324	90.2703
			60.8577	95.5331	95.5331
				95.5331	92.058
				102.129	90.2703
				100.521	105.272
			64.2805	100.521	100.521
				97.2241	90.2703
			68.0184	106.809	92.058
			64.7042	100.521	92.058
				95.5331	92.058
				97.2241	95.5331
			63.6422	97.2241	93.8117
				93.8117	90.2703
			61.7124	97.2241	93.8117
			62.8308	98.8862	93.8117
			63.9976	97.2241	100.521
			67.3582	108.324	97.2241
				97.2241	93.8117
			73.6759	126.378	97.2241
				97.2241	92.058
				98.8862	93.8117
			58.9353	92.058	92.058
			85.2101	127.662	90.2703
			64.0567	100.521	92.058
			63.4272	98.8862	90.2703
				100.521	98.8862
				97.2241	92.058
			65.7643	100.521	102.129
			59.7582	97.2241	92.058
				97.2241	92.058
			67.0062	102.129	92.058
			64.7556	103.713	95.5331
			66.8787	106.809	93.8117
				97.2241	92.058
			68.8517	103.713	90.2703
			61.9049	98.8862	90.2703
			59.179	97.2241	98.8862
				92.058	95.5331
			62.5671	102.129	92.058
			61.8677	98.8862	100.521
				92.058	97.2241
				98.8862	92.058
				95.5331	93.8117
				97.2241	93.8117
				95.5331	97.2241
				100.521	92.058
				92.058	90.2703
				98.8862	92.058
			61.2153	95.5331	93.8117
				102.129	92.058
				98.8862	95.5331
			63.0714	98.8862	98.8862
				100.521	90.2703
				97.2241	92.058
				97.2241	97.2241
			64.0703	98.8862	92.058
				97.2241	90.2703
				95.5331	95.5331
				98.8862	103.713
				93.8117	90.2703
			65.1014	100.521	97.2241
			63.5395	102.129	95.5331
			7.51891e+73	90.2703	97.2241
			60.1837	98.8862	97.2241
				90.2703	98.8862
			62.642	100.521	97.2241
			60.6114	97.2241	90.2703
				95.5331	102.129
				93.8117	95.5331
				98.8862	90.2703
			61.7001	97.2241	90.2703
			62.1377	100.521	92.058
			60.3779	95.5331	100.521
				100.521	92.058
			66.2982	105.272	95.5331
			69.9988	105.272	100.521
			60.8747	100.521	90.2703
				100.521	92.058
				93.8117	97.2241
			60.8482	97.2241	93.8117
				92.058	92.058
			62.6778	98.8862	97.2241
			68.1768	106.809	97.2241
				95.5331	98.8862
			67.6094	108.324	93.8117
				95.5331	105.272
			62.6545	93.8117	93.8117
				95.5331	95.5331
				98.8862	97.2241
				97.2241	97.2241
			1057.5	98.8862	93.8117
				102.129	98.8862
				98.8862	100.521
				97.2241	92.058
			80.064	131.436	100.521
				109.819	105.272
				98.8862	100.521
			61.6409	100.521	93.8117
			63.4358	102.129	95.5331
			72.4102	119.757	98.8862
				105.272	92.058
			62.7424	97.2241	92.058
			58.2543	92.058	100.521
				97.2241	95.5331
			60.6193	95.5331	106.809
				97.2241	90.2703
				103.713	98.8862
				100.521	97.2241
				103.713	90.2703
				93.8117	93.8117
				97.2241	95.5331
				92.058	95.5331
				98.8862	98.8862
				93.8117	93.8117
			62.2022	98.8862	93.8117
				90.2703	97.2241
			62.6982	102.129	98.8862
			64.3369	102.129	92.058
				95.5331	97.2241
				98.8862	102.129
			65.9358	100.521	92.058
				93.8117	100.521
				98.8862	90.2703
				97.2241	105.272
			63.758	98.8862	92.058
				97.2241	97.2241
				102.129	90.2703
				98.8862	103.713
				95.5331	93.8117
				95.5331	100.521
			57.0792	93.8117	95.5331
				93.8117	95.5331
			64.2067	100.521	97.2241
				102.129	92.058
				93.8117	92.058
				90.2703	102.129
			61.2862	100.521	92.058
				102.129	97.2241
				102.129	90.2703
				92.058	90.2703
				93.8117	98.8862
				97.2241	95.5331
			68.7924	106.809	102.129
			70.0135	109.819	95.5331
				97.2241	95.5331
				95.5331	97.2241
			329.749	92.058	95.5331
				97.2241	92.058
				92.058	93.8117
				100.521	92.058
			62.5917	98.8862	92.058
				102.129	100.521
				93.8117	95.5331
			64.7854	102.129	97.2241
				97.2241	100.521
				97.2241	90.2703
			59.9472	92.058	97.2241
				98.8862	98.8862
			64.08	102.129	102.129
				90.2703	100.521
				93.8117	92.058
			73.7406	122.449	90.2703
				95.5331	97.2241
				90.2703	95.5331
			69.6198	106.809	92.058
			68.6553	105.272	92.058
				90.2703	92.058
				97.2241	97.2241
			64.2465	98.8862	90.2703
			65.5317	103.713	92.058
				97.2241	92.058
				92.058	90.2703
			60.6164	97.2241	95.5331
				102.129	103.713
				95.5331	102.129
				100.521	90.2703
				92.058	90.2703
				100.521	90.2703
				100.521	93.8117
			67.0652	105.272	98.8862
				90.2703	90.2703
			64.3282	102.129	93.8117
				97.2241	93.8117
			72.5157	108.324	90.2703
			69.1713	106.809	92.058
			65.3121	98.8862	93.8117
			72.0658	105.272	90.2703
				97.2241	92.058
			72.3035	109.819	95.5331
				95.5331	98.8862
			83.7257	123.772	93.8117
			68.7658	108.324	90.2703
			65.8668	100.521	97.2241
				93.8117	93.8117
				98.8862	93.8117
			65.5136	103.713	98.8862
				105.272	93.8117
			64.3721	103.713	90.2703
			87.1498	135.104	97.2241
				103.713	98.8862
			67.2587	103.713	95.5331
				106.809	93.8117
				100.521	90.2703
				103.713	93.8117
				98.8862	92.058
			67.4694	106.809	97.2241
				95.5331	97.2241
			72.5004	114.184	105.272
				98.8862	90.2703
				100.521	93.8117
				93.8117	93.8117
				102.129	90.2703
				93.8117	111.293
				102.129	90.2703
			65.095	102.129	92.058
			67.6249	105.272	92.058
				97.2241	105.272
				97.2241	93.8117
				100.521	103.713
				97.2241	92.058
				97.2241	92.058
				92.058	93.8117
			70.5804	106.809	95.5331
				97.2241	102.129
			61.5474	97.2241	92.058
			67.8048	105.272	93.8117
				102.129	98.8862
				103.713	90.2703
			64.9391	100.521	100.521
			63.9595	100.521	93.8117
				93.8117	92.058
				100.521	93.8117
				95.5331	100.521
				98.8862	93.8117
			66.8727	103.713	92.058
			72.0319	111.293	95.5331
			66.25	100.521	95.5331
				98.8862	97.2241
				100.521	90.2703
			66.0434	105.272	98.8862
				97.2241	90.2703
			63.9424	98.8862	98.8862
			61.8915	95.5331	92.058
				97.2241	98.8862
			63.1187	95.5331	100.521
			71.6549	108.324	95.5331
			62.7171	97.2241	90.2703
				106.809	102.129
				90.2703	93.8117
				121.11	92.058
			69.0138	109.819	93.8117
			70.7364	109.819	93.8117
				100.521	93.8117
			97.3678	149.968	90.2703
			84.5238	126.378	97.2241
				90.2703	95.5331
				92.058	102.129
			69.8443	108.324	98.8862
			64.7206	98.8862	93.8117
			63.9655	98.8862	92.058
			63.8791	98.8862	90.2703
				102.129	92.058
				98.8862	92.058
			64.8157	98.8862	93.8117
				97.2241	92.058
				98.8862	97.2241
				102.129	97.2241
				92.058	90.2703
				100.521	90.2703
			66.1847	102.129	93.8117
				103.713	90.2703
			61.9221	97.2241	95.5331
			91.0591	139.846	95.5331
				98.8862	95.5331
			62.9873	98.8862	95.5331
				95.5331	95.5331
				108.324	93.8117
				105.272	93.8117
				97.2241	100.521
				103.713	97.2241
			73.2186	112.748	92.058
			77.7685	112.748	92.058
			71.7519	111.293	95.5331
			68.584	106.809	93.8117
				97.2241	93.8117
			64.155	106.809	92.058
				98.8862	90.2703
			63.8899	97.2241	92.058
				100.521	90.2703
			63.445	97.2241	93.8117
				95.5331	100.521
			62.7625	95.5331	98.8862
			87.4588	157.392	93.8117
				95.5331	102.129
				102.129	90.2703
			63.7387	98.8862	98.8862
				95.5331	90.2703
				97.2241	100.521
				100.521	97.2241
				100.521	95.5331
				100.521	97.2241
			61.5374	100.521	95.5331
				93.8117	92.058
				100.521	93.8117
				97.2241	98.8862
				100.521	90.2703
			65.3048	106.809	103.713
				93.8117	92.058
				90.2703	95.5331
			66.9513	105.272	98.8862
			61.0983	100.521	98.8862
				95.5331	92.058
				95.5331	93.8117
			64.4064	100.521	97.2241
				95.5331	90.2703
				98.8862	93.8117
				95.5331	90.2703
				100.521	95.5331
			62.1621	100.521	98.8862
			57.3575	92.058	95.5331
				90.2703	93.8117
			63.4567	98.8862	100.521
				93.8117	95.5331
				98.8862	93.8117
			62.8718	100.521	97.2241
				102.129	90.2703
				100.521	93.8117
			57.1852	90.2703	100.521
				97.2241	93.8117
				100.521	95.5331
			60.0052	93.8117	90.2703
				100.521	90.2703
			70.7592	108.324	92.058
			69.7735	105.272	95.5331
				93.8117	90.2703
				98.8862	93.8117
			64.4402	98.8862	95.5331
			63.2297	98.8862	90.2703
				102.129	92.058
				97.2241	90.2703
			58.6575	95.5331	92.058
				100.521	97.2241
				102.129	92.058
				98.8862	97.2241
				100.521	90.2703
				92.058	90.2703
			63.0139	97.2241	102.129
				93.8117	100.521
				105.272	93.8117
				97.2241	90.2703
			58.5674	95.5331	97.2241
			62.6624	98.8862	90.2703
				106.809	92.058
			64.0427	97.2241	100.521
				92.058	97.2241
			60.3525	93.8117	90.2703
				92.058	100.521
			65.3422	103.713	90.2703
				100.521	95.5331
				98.8862	97.2241
			85.6326	127.662	90.2703
				102.129	98.8862
			62.9138	100.521	95.5331
			84.8651	137.496	93.8117
			62.0064	98.8862	90.2703
			63.6562	105.272	90.2703
			70.4125	105.272	95.5331
			81.3243	114.184	92.058
				95.5331	98.8862
				93.8117	90.2703
			62.9724	98.8862	90.2703
				95.5331	90.2703
			60.3097	95.5331	95.5331
				90.2703	90.2703
				93.8117	100.521
				95.5331	95.5331
			69.388	108.324	98.8862
				98.8862	98.8862
				92.058	98.8862
				98.8862	90.2703
			65.3162	100.521	90.2703
			63.5378	100.521	97.2241
				95.5331	103.713
				98.8862	100.521
				97.2241	93.8117
				97.2241	98.8862
				102.129	98.8862
			65.5007	100.521	98.8862
				100.521	106.809
				92.058	95.5331
			61.8165	95.5331	100.521
			62.4286	102.129	97.2241
				103.713	95.5331
				92.058	100.521
			61.7696	98.8862	92.058
				97.2241	95.5331
				90.2703	98.8862
			62.9315	97.2241	93.8117
				93.8117	103.713
			58.8451	93.8117	103.713
			62.5178	98.8862	97.2241
				92.058	98.8862
				95.5331	95.5331
				90.2703	95.5331
				93.8117	102.129
				105.272	98.8862
				92.058	93.8117
			62.8924	95.5331	90.2703
				103.713	105.272
				98.8862	92.058
				92.058	95.5331
			60.1639	95.5331	97.2241
				100.521	102.129
				103.713	98.8862
				92.058	98.8862
				98.8862	92.058
				90.2703	106.809
			83.2698	127.662	92.058
				98.8862	102.129
			69.9208	106.809	98.8862
				97.2241	102.129
				100.521	90.2703
			65.3892	102.129	102.129
				95.5331	106.809
			69.5999	106.809	98.8862
				98.8862	93.8117
			65.903	105.272	95.5331
				102.129	103.713
			-2.50332e+14	92.058	102.129
			61.8898	95.5331	103.713
				98.8862	102.129
				100.521	105.272
			66.3254	103.713	92.058
				100.521	90.2703
			67.4705	108.324	93.8117
				102.129	92.058
				102.129	97.2241
				100.521	105.272
				95.5331	97.2241
				98.8862	105.272
			68.8884	108.324	112.748
				100.521	102.129
				90.2703	108.324
				98.8862	98.8862
				95.5331	92.058
			64.1173	100.521	92.058
			62.2536	97.2241	97.2241
			64.7795	103.713	95.5331
				92.058	98.8862
				102.129	93.8117
				95.5331	95.5331
				100.521	102.129
				100.521	97.2241
			61.6051	100.521	97.2241
			69.5291	106.809	92.058
			66.611	103.713	93.8117
			63.4209	97.2241	95.5331
				93.8117	98.8862
				108.324	95.5331
				102.129	93.8117
				95.5331	105.272
			63.2374	97.2241	97.2241
			64.7837	103.713	93.8117
			60.8836	97.2241	100.521
				102.129	93.8117
			66.6496	106.809	102.129
			64.0268	100.521	103.713
				90.2703	95.5331
			63.4897	102.129	92.058
			69.1011	103.713	98.8862
			90.0878	145.557	93.8117
				100.521	105.272
				97.2241	103.713
			67.1959	106.809	100.521
				103.713	98.8862
			61.2329	98.8862	93.8117
			86.952	133.893	92.058
				97.2241	95.5331
				100.521	90.2703
				95.5331	105.272
			64.5546	103.713	106.809
			64.1387	102.129	90.2703
			95.2501	141.007	98.8862
			68.0825	108.324	92.058
				95.5331	90.2703
			61.694	98.8862	90.2703
			62.1949	100.521	98.8862
				102.129	95.5331
				100.521	100.521
			65.3414	103.713	100.521
			62.1107	95.5331	95.5331
			65.2829	100.521	97.2241
			67.912	105.272	100.521
				95.5331	95.5331
				90.2703	98.8862
				106.809	102.129
				102.129	92.058
				109.819	100.521
			65.9269	100.521	105.272
				95.5331	92.058
			69.4744	106.809	93.8117
				102.129	93.8117
				102.129	95.5331
				90.2703	97.2241
				97.2241	102.129
			27948.7	98.8862	97.2241
			65.5428	102.129	102.129
				102.129	98.8862
				95.5331	102.129
			59.8721	93.8117	92.058
				92.058	100.521
			67.7632	106.809	92.058
				90.2703	97.2241
				98.8862	93.8117
				97.2241	92.058
				97.2241	90.2703
			73.3274	112.748	98.8862
				102.129	90.2703
				102.129	98.8862
				95.5331	100.521
				97.2241	95.5331
			65.5064	103.713	95.5331
			64.045	98.8862	93.8117
				102.129	103.713
			66.431	102.129	97.2241
			61.384	100.521	100.521
			65.6996	106.809	92.058
				95.5331	103.713
				98.8862	98.8862
			61.0394	98.8862	97.2241
				95.5331	90.2703
			68.2079	105.272	93.8117
				103.713	102.129
			57.2282	93.8117	95.5331
			61.4911	97.2241	98.8862
			61.7086	98.8862	92.058
			59.8491	95.5331	92.058
			64.7867	102.129	95.5331
				100.521	95.5331
			-5.3556e+10	97.2241	100.521
			66.557	103.713	92.058
				102.129	90.2703
				95.5331	92.058
				103.713	97.2241
			83.3218	127.662	93.8117
				102.129	102.129
				95.5331	90.2703
			68.2918	111.293	92.058
			79.5003	132.67	92.058
				93.8117	90.2703
			70.0669	105.272	97.2241
				103.713	100.521
			61.0131	97.2241	100.521
			56.6685	93.8117	92.058
				98.8862	92.058
			61.7976	100.521	98.8862
				103.713	100.521
				97.2241	93.8117
				97.2241	98.8862
				95.5331	103.713
			64.1998	97.2241	92.058
				137.496	97.2241
			61.8097	95.5331	97.2241
			66.7051	106.809	90.2703
			66.0885	102.129	92.058
			59.3971	93.8117	97.2241
				100.521	93.8117
				102.129	97.2241
				100.521	100.521
			68.4814	109.819	92.058
			64.7918	106.809	93.8117
			61.163	95.5331	90.2703
				90.2703	98.8862
				105.272	100.521
			61.9077	97.2241	93.8117
				102.129	92.058
				100.521	98.8862
			66.5968	106.809	97.2241
				98.8862	97.2241
				93.8117	100.521
				90.2703	97.2241
				98.8862	102.129
			59.2147	92.058	98.8862
				95.5331	90.2703
				95.5331	100.521
				93.8117	97.2241
			67.7823	109.819	100.521
				97.2241	92.058
			62.9709	100.521	90.2703
				95.5331	92.058
			64.6107	103.713	90.2703
				102.129	92.058
				114.184	102.129
			61.3987	98.8862	100.521
				108.324	95.5331
			61.0462	95.5331	90.2703
				92.058	97.2241
				97.2241	93.8117
			63.1427	102.129	93.8117
			65.1604	103.713	95.5331
			62.929	108.324	98.8862
				103.713	95.5331
			60.9837	98.8862	93.8117
				93.8117	95.5331
			67.4731	106.809	92.058
				98.8862	90.2703
				95.5331	92.058
			73.0706	111.293	98.8862
			74.6445	114.184	92.058
				103.713	93.8117
				92.058	90.2703
				93.8117	95.5331
				123.772	95.5331
				95.5331	98.8862
				100.521	103.713
			67.4317	108.324	102.129
				95.5331	93.8117
			58.7827	93.8117	98.8862
				100.521	90.2703
				102.129	93.8117
			75.2687	118.388	95.5331
				93.8117	92.058
				95.5331	97.2241
				97.2241	92.058
				93.8117	97.2241
				98.8862	93.8117
			14253.1	97.2241	90.2703
				98.8862	92.058
			67.5265	109.819	98.8862
			78.3621	126.378	90.2703
			64.8946	100.521	93.8117
			63.7649	102.129	98.8862
				95.5331	97.2241
			66.5317	103.713	90.2703
				93.8117	95.5331
				97.2241	98.8862
				97.2241	93.8117
				100.521	92.058
			59.5771	97.2241	93.8117
			67.8665	106.809	100.521
				98.8862	95.5331
			66.1057	102.129	95.5331
				90.2703	97.2241
				95.5331	97.2241
				92.058	97.2241
			63.3378	97.2241	97.2241
			59.0007	100.521	100.521
				98.8862	97.2241
				97.2241	97.2241
			63.9239	95.5331	93.8117
				98.8862	90.2703
				95.5331	97.2241
				90.2703	90.2703
			63.3174	102.129	90.2703
				98.8862	93.8117
				98.8862	95.5331
				92.058	92.058
				97.2241	93.8117
				100.521	90.2703
				102.129	90.2703
				105.272	95.5331
				95.5331	95.5331
				103.713	93.8117
			63.6328	100.521	93.8117
				100.521	92.058
			59.4854	95.5331	97.2241
				100.521	92.058
				95.5331	97.2241
			78.4312	130.19	92.058
			60.6367	98.8862	98.8862
				93.8117	103.713
			59.5733	95.5331	90.2703
				95.5331	93.8117
				95.5331	103.713
				178.726	92.058
				98.8862	95.5331
				118.388	97.2241
				93.8117	95.5331
				97.2241	95.5331
			62.9052	98.8862	90.2703
				98.8862	100.521
			66.2452	100.521	97.2241
				98.8862	93.8117
			63.2323	97.2241	95.5331
			67.155	102.129	98.8862
				98.8862	92.058
				95.5331	90.2703
				102.129	93.8117
			68.7856	106.809	103.713
			59.3123	98.8862	97.2241
			70.5361	108.324	100.521
			64.8177	98.8862	93.8117
			68.4221	100.521	93.8117
			65.3677	100.521	93.8117
			64.0698	98.8862	93.8117
				100.521	95.5331
				93.8117	92.058
			64.4479	100.521	90.2703
				95.5331	90.2703
				103.713	92.058
				98.8862	95.5331
				97.2241	103.713
				100.521	95.5331
			70.6969	108.324	95.5331
			63.9292	97.2241	98.8862
				97.2241	93.8117
			64.6339	102.129	93.8117
			66.4615	98.8862	97.2241
			70.1369	106.809	98.8862
			62.6832	98.8862	97.2241
			69.1642	103.713	103.713
				97.2241	102.129
			64.3752	98.8862	106.809
			66.1218	98.8862	97.2241
				103.713	97.2241
				100.521	93.8117
				103.713	102.129
				103.713	97.2241
				103.713	90.2703
			90.0563	135.104	93.8117
			68.7902	106.809	93.8117
				98.8862	97.2241
			61.7991	97.2241	95.5331
				102.129	98.8862
			66.9946	105.272	97.2241
				97.2241	92.058
			65.7966	100.521	98.8862
				103.713	93.8117
				100.521	95.5331
			68.3953	103.713	92.058
				92.058	100.521
			64.4768	102.129	92.058
			62.7418	98.8862	97.2241
			85.1376	127.662	100.521
				102.129	98.8862
				95.5331	100.521
				102.129	98.8862
			69.5872	105.272	90.2703
				98.8862	102.129
				105.272	93.8117
			62.0561	100.521	98.8862
				100.521	95.5331
			68.2809	102.129	90.2703
				103.713	103.713
				92.058	98.8862
			68.4272	105.272	102.129
				92.058	92.058
			69.7867	108.324	103.713
			81.4722	121.11	90.2703
			60.6198	93.8117	103.713
			75.2148	105.272	102.129
				92.058	95.5331
				92.058	103.713
			67.1722	100.521	93.8117
			62.7548	98.8862	103.713
			69.6627	108.324	98.8862
				90.2703	95.5331
				97.2241	98.8862
			63.5912	97.2241	102.129
				92.058	93.8117
			65.2508	97.2241	97.2241
				105.272	95.5331
			64.5867	102.129	93.8117
				108.324	97.2241
			69.2157	108.324	97.2241
				103.713	93.8117
			63.6758	98.8862	98.8862
			67.9698	106.809	92.058
			67.0066	105.272	98.8862
			70.7405	109.819	90.2703
			75.2305	111.293	102.129
			67.357	106.809	93.8117
			89.3637	153.194	100.521
				92.058	92.058
				93.8117	98.8862
				100.521	92.058
			67.0772	100.521	103.713
				95.5331	93.8117
			68.61	105.272	100.521
			65.9407	100.521	97.2241
			59.1776	92.058	90.2703
				93.8117	97.2241
				102.129	93.8117
			62.3466	97.2241	102.129
			61.524	93.8117	102.129
			70.2505	108.324	97.2241
			62.4903	97.2241	90.2703
				100.521	98.8862
				92.058	95.5331
			68.6598	106.809	95.5331
			64.9937	103.713	102.129
				90.2703	98.8862
				102.129	95.5331
				95.5331	93.8117
				97.2241	93.8117
			66.7911	105.272	97.2241
				97.2241	93.8117
				100.521	108.324
			64.8173	100.521	97.2241
			63.5424	102.129	100.521
			82.0929	130.19	102.129
			69.05	106.809	97.2241
			74.5569	109.819	98.8862
				102.129	92.058
			68.1786	106.809	98.8862
				100.521	90.2703
				102.129	95.5331
			64.831	97.2241	102.129
				97.2241	103.713
				102.129	97.2241
			61.7032	98.8862	102.129
				112.748	100.521
				98.8862	100.521
				97.2241	98.8862
			78.7314	122.449	92.058
				95.5331	97.2241
				97.2241	92.058
				100.521	97.2241
				106.809	97.2241
			67.4952	102.129	90.2703
			70.9461	108.324	97.2241
				95.5331	93.8117
				106.809	98.8862
				92.058	100.521
			68.0862	106.809	103.713
			68.2387	106.809	100.521
				103.713	92.058
				102.129	97.2241
			65.1534	100.521	98.8862
				95.5331	92.058
			62.5251	98.8862	97.2241
			64.9841	106.809	95.5331
				97.2241	92.058
			65.5079	103.713	100.521
				98.8862	98.8862
				93.8117	98.8862
			88.817	127.662	95.5331
			68.3032	102.129	98.8862
			65.8036	102.129	97.2241
				108.324	95.5331
				102.129	95.5331
				105.272	97.2241
				92.058	95.5331
				93.8117	93.8117
			65.3384	102.129	97.2241
			63.6637	100.521	98.8862
			69.6733	106.809	95.5331
			-2.9504e+110	95.5331	90.2703
			65.0033	100.521	100.521
			104.634	167.427	92.058
			71.9033	109.819	93.8117
				90.2703	97.2241
			67.7346	102.129	95.5331
			64.6595	105.272	95.5331
				97.2241	95.5331
			62.1024	95.5331	97.2241
				103.713	98.8862
				100.521	105.272
				97.2241	95.5331
			66.7709	105.272	100.521
			69.1348	105.272	98.8862
			66.0159	103.713	92.058
				97.2241	103.713
				102.129	90.2703
				98.8862	97.2241
				92.058	98.8862
			69.5336	105.272	90.2703
				92.058	92.058
				97.2241	93.8117
			70.6635	108.324	97.2241
				100.521	98.8862
				105.272	92.058
			65.1552	100.521	97.2241
				98.8862	98.8862
				102.129	93.8117
			61.6071	95.5331	97.2241
				92.058	95.5331
			66.6213	105.272	102.129
				92.058	100.521
				95.5331	93.8117
				92.058	100.521
				97.2241	90.2703
				102.129	98.8862
			79.5238	118.388	92.058
			88.3215	136.305	90.2703
			62.472	97.2241	102.129
			70.6855	109.819	100.521
				98.8862	98.8862
				103.713	105.272
			-2.79183e+14	92.058	95.5331
				106.809	93.8117
			63.7451	95.5331	98.8862
			61.4852	98.8862	100.521
				98.8862	93.8117
			73.4947	109.819	97.2241
				92.058	97.2241
				98.8862	100.521
				97.2241	98.8862
			61.3851	97.2241	93.8117
			72.2157	108.324	98.8862
			66.1298	102.129	100.521
			62.015	95.5331	100.521
				90.2703	98.8862
				100.521	92.058
				95.5331	92.058
				98.8862	98.8862
			65.8114	98.8862	93.8117
			63.2086	100.521	97.2241
				102.129	97.2241
			60.4743	95.5331	97.2241
				103.713	102.129
			63.4567	97.2241	98.8862
			67.4035	105.272	93.8117
				98.8862	102.129
				102.129	97.2241
				106.809	97.2241
				102.129	95.5331
				102.129	93.8117
				95.5331	98.8862
				92.058	90.2703
				93.8117	95.5331
				170.322	95.5331
				122.449	90.2703
				109.819	98.8862
			62.0237	102.129	92.058
				103.713	90.2703
			62.447	100.521	98.8862
			61.9841	100.521	92.058
				106.809	97.2241
				106.809	95.5331
				93.8117	98.8862
				100.521	97.2241
				97.2241	90.2703
				108.324	100.521
				100.521	100.521
				103.713	102.129
				102.129	97.2241
			68.7113	105.272	95.5331
			70.7332	108.324	103.713
				98.8862	102.129
			65.3903	100.521	100.521
			62.6672	98.8862	92.058
				105.272	92.058
				95.5331	95.5331
				108.324	103.713
			-1.3031e+71	97.2241	97.2241
			59.9413	95.5331	93.8117
			62.1462	98.8862	98.8862
			60.707	97.2241	97.2241
			67.4645	103.713	98.8862
				102.129	90.2703
				100.521	97.2241
				98.8862	97.2241
				102.129	92.058
				100.521	100.521
				93.8117	106.809
			309.507	93.8117	100.521
			62.5378	97.2241	102.129
				95.5331	90.2703
			60.9377	98.8862	93.8117
				100.521	95.5331
				97.2241	97.2241
				100.521	97.2241
				102.129	105.272
			7.82854	123.772	97.2241
			64.4598	103.713	93.8117
			62.8753	100.521	90.2703
				102.129	102.129
			69.0636	111.293	97.2241
			69.6975	102.129	92.058
				100.521	102.129
			75.4341	117.004	102.129
				95.5331	90.2703
				97.2241	93.8117
			68.0128	105.272	93.8117
			67.8501	108.324	95.5331
			61.5334	95.5331	98.8862
			58.5477	95.5331	97.2241
			64.0013	100.521	92.058
				97.2241	97.2241
				98.8862	93.8117
			77.9818	112.748	93.8117
			61.2829	97.2241	98.8862
			64.2254	103.713	97.2241
				102.129	92.058
			61.6663	97.2241	93.8117
				106.809	92.058
				103.713	90.2703
			58.3381	95.5331	90.2703
			63.7554	100.521	93.8117
				90.2703	92.058
			63.3676	100.521	93.8117
			60.3394	97.2241	90.2703
			63.2015	95.5331	97.2241
				97.2241	95.5331
				98.8862	90.2703
				90.2703	92.058
				97.2241	97.2241
				100.521	93.8117
			68.2484	102.129	92.058
			63.4004	102.129	95.5331
				97.2241	90.2703
				100.521	95.5331
				90.2703	92.058
				103.713	93.8117
			65.6407	100.521	97.2241
				95.5331	90.2703
			62.8106	100.521	98.8862
			93.8349	139.846	95.5331
			62.9384	100.521	90.2703
				97.2241	93.8117
				102.129	92.058
			65.6452	105.272	90.2703
				100.521	98.8862
				95.5331	93.8117
			67.2724	105.272	98.8862
				95.5331	93.8117
				98.8862	92.058
			-3.24894e+212	97.2241	98.8862
			60.553	97.2241	97.2241
			63.155	97.2241	97.2241
				98.8862	100.521
				97.2241	97.2241
				90.2703	93.8117
			67.2288	105.272	102.129
				100.521	93.8117
				100.521	95.5331
			80.891	123.772	97.2241
			57.7592	92.058	92.058
			70.4162	114.184	95.5331
			60.0394	93.8117	93.8117
			61.3168	95.5331	93.8117
			81.7946	123.772	100.521
			70.6033	105.272	95.5331
				95.5331	92.058
				97.2241	97.2241
				103.713	95.5331
			60.1208	98.8862	92.058
			69.195	109.819	95.5331
			26120.3	98.8862	90.2703
			63.5181	97.2241	102.129
			63.5588	98.8862	98.8862
				102.129	90.2703
				93.8117	90.2703
			64.6559	93.8117	92.058
			65.3862	98.8862	95.5331
				98.8862	97.2241
				95.5331	93.8117
			64.3693	100.521	102.129
			67.4596	103.713	90.2703
			64.637	100.521	92.058
			68.0978	106.809	97.2241
				100.521	102.129
			58.9693	92.058	98.8862
				100.521	100.521
				98.8862	92.058
				97.2241	95.5331
			62.1114	100.521	100.521
				100.521	98.8862
			62.4002	97.2241	98.8862
				93.8117	92.058
				100.521	93.8117
				95.5331	97.2241
			63.1788	97.2241	90.2703
			62.976	98.8862	95.5331
			58.6031	93.8117	98.8862
				100.521	90.2703
			58.4082	93.8117	92.058
				100.521	90.2703
				95.5331	95.5331
			63.6912	100.521	95.5331
			66.9936	102.129	100.521
				95.5331	95.5331
			64.6097	98.8862	93.8117
			64.6532	103.713	103.713
			61.8557	100.521	92.058
				92.058	103.713
			65.4777	103.713	100.521
				106.809	93.8117
				100.521	95.5331
				92.058	92.058
				105.272	103.713
			66.7205	100.521	92.058
			68.9413	103.713	95.5331
				93.8117	103.713
				90.2703	97.2241
			68.0109	105.272	97.2241
			67.9676	106.809	95.5331
			64.8165	97.2241	98.8862
			17747.7	98.8862	98.8862
				105.272	92.058
				102.129	100.521
			68.8787	108.324	95.5331
				97.2241	92.058
				103.713	95.5331
				98.8862	100.521
			70.7725	109.819	92.058
			68.9904	111.293	93.8117
			70.8475	106.809	90.2703
			66.6793	102.129	93.8117
			67.1371	106.809	95.5331
				100.521	90.2703
				105.272	100.521
			59.6081	97.2241	92.058
				98.8862	90.2703
				139.846	97.2241
				98.8862	102.129
			69.3631	108.324	93.8117
			62.8198	100.521	90.2703
			64.6911	98.8862	90.2703
			65.6802	98.8862	100.521
			66.5134	102.129	93.8117
			64.6762	102.129	92.058
				97.2241	93.8117
			66.2871	102.129	95.5331
				98.8862	92.058
				98.8862	98.8862
				98.8862	95.5331
				97.2241	98.8862
				100.521	93.8117
			67.892	109.819	92.058
			62.7538	97.2241	92.058
			66.7745	100.521	100.521
				90.2703	90.2703
				95.5331	95.5331
			67.357	103.713	93.8117
				100.521	90.2703
				103.713	98.8862
				98.8862	92.058
			66.3679	100.521	93.8117
				97.2241	93.8117
			65.0182	102.129	93.8117
				100.521	93.8117
			66.5143	103.713	95.5331
			57.4874	97.2241	98.8862
			69.813	102.129	92.058
			73.4995	112.748	98.8862
				92.058	97.2241
			71.117	106.809	106.809
			63.7352	102.129	95.5331
			71.2129	109.819	93.8117
			72.6645	109.819	90.2703
			67.8838	103.713	93.8117
			69.0001	106.809	92.058
				100.521	100.521
				95.5331	98.8862
				105.272	90.2703
			68.9412	103.713	92.058
			75.5653	127.662	97.2241
			64.4453	98.8862	98.8862
				98.8862	92.058
			62.2409	97.2241	97.2241
				93.8117	98.8862
				103.713	100.521
				102.129	97.2241
				98.8862	102.129
			73.4371	112.748	92.058
			71.4141	111.293	95.5331
				103.713
			70.5967	109.819
				95.5331
				105.272
			89.2968	130.19
				97.2241
				106.809
				95.5331
			70.148	112.748
				97.2241
				95.5331
				97.2241
			70.0493	109.819
			7.50379e+41	93.8117
			63.1565	98.8862
			68.3702	105.272
				97.2241
				103.713
			66.2461	102.129
				97.2241
			67.5942	108.324
			62.6014	98.8862
			63.8307	102.129
			68.4678	103.713
				106.809
			65.5944	100.521
			62.2505	100.521
				97.2241
			64.4855	103.713
			62.3381	98.8862
			71.4409	109.819
				92.058
[truncated: 531 more rows]

## Sheet: A South Dakota
Filamentous length	Filamentous persistence length	Small filamentous length	Large spherical radius	Large spherical equivalent radius	Small spherical radius	Unknown equivalent radius	Rod length	Rod diameter
231.765		135.764	67.3493	108.324	105.272	115.602
231.765	187.86	109.255	336.685	93.8117	100.521	115.602
514.274	280.287	154.51	62.4804	97.2241	97.2241	115.602
341.019	852.287	96		93.8117	98.8862	102.129
301.255	189.678	122.51	74.5228	121.11	108.324	128.932
263.765		77.2548	63.1818	102.129	106.809	103.713
263.765		77.2548		102.129	98.8862	144.433
269.255		154.51	60.4528	93.8117	90.2703	92.058
231.764	8721.43	218.51	74.585	119.757	98.8862	118.388
269.255	140.71	250.51	82.327	125.082	109.819	102.129
309.019	733.165	109.255	61.5059	97.2241	92.058	121.11
309.019	9.82928	186.51	71.0005	119.757	90.2703	136.305
618.039	1729.01	96		93.8117	102.129	118.388
277.019		173.255	84.5991	126.378	112.748	105.272
277.019		96		93.8117	98.8862	111.293
269.255		122.51	11.5501	132.67	97.2241	151.051
224	49.894	109.255	57.9077	95.5331	105.272	117.004
341.019	19.9623	141.255	74.9003	118.388	97.2241	95.5331
354.274	50.9563	122.51	104.044	158.424	103.713	105.272
263.765		96	65.5215	109.819	100.521	166.45
245.019	23.3163	154.51	120.355	172.225	97.2241	131.436
250.51		231.765		97.2241	100.521	137.496
250.51		141.255		130.19	90.2703	126.378
282.51	7.53271	109.255	73.6345	118.388	93.8117	135.104
213.019		109.255	73.9113	115.602	90.2703	118.388
250.51		231.765		100.521	102.129	112.748
231.765		213.019	72.9468	112.748	109.819	106.809
277.019		77.2548	61.5425	97.2241	98.8862	123.772
173.255		109.255	76.9373	123.772	102.129	160.468
263.765	61.4664	109.255		95.5331	90.2703	109.819
160		186.51	97.496	146.672	108.324	95.5331
154.51		263.765	72.9067	122.449	100.521	111.293
309.019		186.51	73.76	126.378	100.521	118.388
186.51		96		106.809	97.2241	106.809
367.529	53.9613	231.765		152.126	102.129	122.449
226.274		141.255	77.6916	117.004	92.058	127.662
282.51		186.51	75.6087	118.388	93.8117	106.809
		122.51	79.9783	132.67	97.2241	111.293
		154.51	72.2656	123.772	97.2241	103.713
		96	67.5418	100.521	103.713	114.184
		218.51	90.106	138.676	97.2241	115.602
		173.255	83.6614	131.436	100.521	126.378
		173.255	70.4373	131.436	112.748	127.662
		122.51	73.946	122.449	95.5331	143.3
		128	53.3472	123.772	98.8862	122.449
		128	74.6076	119.757	114.184
		109.255	75.1156	115.602	90.2703
		186.51	82.1686	128.932	93.8117
		141.255	114.243	168.397	102.129
		192	80.8491	127.662	100.521
		77.2548	72.2943	119.757	100.521
		64	73.4905	118.388	106.809
		141.255	81.2164	131.436	98.8862
		141.255	82.2882	133.893	98.8862
		122.51	75.5535	121.11	95.5331
		199.765	86.4705	138.676	102.129
		205.255	81.828	123.772	103.713
			62.6005	98.8862	97.2241
			75.1212	121.11	97.2241
			74.6693	118.388	93.8117
				92.058	98.8862
			63.5311	100.521	93.8117
			74.9605	117.004	92.058
			82.1457	131.436	90.2703
			98.0176	148.878	103.713
			69.7828	117.004	105.272
				109.819	108.324
			61.2952	100.521	105.272
			78.4632	125.082	98.8862
			88.1147	139.846	90.2703
			83.9698	126.378	103.713
			74.155	119.757	92.058
			65.8916	123.772	92.058
			72.6769	117.004	93.8117
			80.4678	126.378	100.521
				132.67	93.8117
				92.058	93.8117
			75.3188	121.11	103.713
			67.4805	118.388	100.521
				119.757	98.8862
			81.3234	119.757	93.8117
				90.2703	100.521
			71.6913	117.004	106.809
			81.2212	125.082	105.272
				95.5331	103.713
			76.8377	125.082	95.5331
			80.0721	127.662	121.11
			64.135	97.2241	92.058
			75.0579	117.004	105.272
			76.545	123.772	93.8117
				90.2703	106.809
			81.4666	130.19	105.272
				108.324	108.324
				103.713	103.713
			100.051	146.672	98.8862
			83.904	121.11	112.748
			74.3211	121.11	90.2703
			67.2739	111.293	103.713
			67.8658	125.082	90.2703
			58.6294	95.5331	102.129
			59.9978	122.449	97.2241
			63.2205	103.713	90.2703
				145.557	95.5331
				146.672	97.2241
			12987.9	93.8117	98.8862
			74.7692	118.388	112.748
			74.1277	119.757	111.293
			83.2219	133.893	100.521
			73.3898	117.004	97.2241
			81.186	121.11	100.521
			75.9549	115.602	95.5331
			79.7183	127.662	92.058
			69.9471	111.293	97.2241
			76.3366	130.19	90.2703
			106.464	154.254	90.2703
			89.751	132.67	93.8117
			87.8191	136.305	97.2241
			65.3671	105.272	95.5331
					97.2241
					90.2703
					93.8117
					93.8117
					90.2703
					100.521
					103.713
					111.293
					111.293
					95.5331
					100.521
					93.8117
					90.2703
					90.2703
					92.058
					112.748
					93.8117
					100.521
					93.8117
					90.2703
					95.5331
					98.8862
					90.2703
					95.5331
					93.8117
					90.2703
					102.129
					102.129
					95.5331
					92.058
					111.293
					90.2703
					95.5331
					92.058
					95.5331
					106.809
					90.2703
					97.2241
					106.809
					97.2241
					112.748
					109.819
					108.324
					102.129
					100.521
					100.521
					103.713
					109.819
					93.8117
					90.2703
					97.2241
					108.324
					103.713
					100.521
					112.748
					93.8117
					97.2241
					93.8117
					108.324
					90.2703
					108.324
					102.129
					90.2703
					90.2703
					95.5331
					106.809
					98.8862
					98.8862
					105.272
					100.521
					117.004
					106.809
					95.5331
					92.058
					109.819
					92.058
					93.8117
					103.713
					97.2241
					98.8862
					109.819
					90.2703
					93.8117
					92.058
					102.129
					98.8862
					97.2241
					90.2703
					95.5331
					109.819
					102.129
					109.819
					102.129
					92.058
					93.8117
					106.809
					92.058
					90.2703
					93.8117
					95.5331
					93.8117
					95.5331
					93.8117
					102.129
					111.293
					109.819
					100.521
					90.2703
					92.058
					105.272
					100.521
					102.129
					100.521
					115.602
					97.2241
					105.272
					93.8117
					92.058
					111.293
					90.2703
					108.324
					111.293
					102.129
					90.2703
					90.2703
					108.324
					95.5331
					102.129
					105.272
					100.521
					93.8117
					100.521
					108.324
					92.058
					115.602
					100.521
					93.8117
					106.809
					93.8117
					93.8117
					103.713
					93.8117
					97.2241
					103.713
					90.2703
					108.324
					93.8117
					102.129
					92.058
					109.819
					109.819
					95.5331
					103.713
					90.2703
					93.8117
					114.184
					98.8862
					92.058
					100.521
					102.129
					97.2241
					98.8862
					105.272
					114.184
					90.2703
					111.293
					93.8117
					93.8117
					98.8862
					92.058
					109.819
					92.058
					102.129
					93.8117
					98.8862
					102.129
					93.8117
					109.819
					100.521
					105.272
					102.129
					93.8117
					92.058
					106.809
					92.058
					97.2241
					98.8862
					109.819
					105.272
					93.8117
					97.2241
					115.602
					92.058
					108.324
					95.5331
					93.8117
					111.293
					95.5331
					93.8117
					100.521
					106.809
					106.809
					90.2703
					103.713
					92.058
					106.809
					97.2241
					93.8117
					93.8117
					117.004
					111.293
					114.184
					98.8862
					105.272
					92.058
					102.129
					106.809
					97.2241
					100.521
					106.809
					95.5331
					93.8117
					97.2241
					100.521
					102.129
					93.8117
					93.8117
					109.819
					100.521
					98.8862
					111.293
					90.2703
					103.713
					98.8862
					106.809
					90.2703
					112.748
					98.8862
					95.5331
					95.5331
					100.521
					102.129
					102.129
					114.184
					102.129
					95.5331
					98.8862
					102.129
					100.521
					95.5331
					93.8117
					105.272
					92.058
					103.713
					97.2241
					106.809
					93.8117
					95.5331
					117.004
					95.5331
					93.8117
					103.713
					97.2241
					100.521
					109.819
					100.521
					109.819
					100.521
					112.748
					92.058
					100.521
					102.129
					100.521
					106.809
					102.129
					93.8117
					100.521
					97.2241
					90.2703
					98.8862
					93.8117
					97.2241
					105.272
					95.5331
					102.129
					93.8117
					108.324
					98.8862
					95.5331
					92.058
					100.521
					100.521
					98.8862
					103.713
					103.713
					90.2703
					117.004
					92.058
					100.521
					112.748
					90.2703
					106.809
					92.058
					100.521
					92.058
					105.272
					98.8862
					100.521
					105.272
					92.058
					105.272
					93.8117
					92.058
					100.521
					92.058
					105.272
					97.2241
					108.324
					92.058
					115.602
					98.8862
					90.2703
					98.8862
					92.058
					92.058
					105.272
					102.129
					95.5331
					90.2703
					97.2241
					103.713
					100.521
					100.521
					100.521
					103.713
					92.058
					98.8862
					100.521
					100.521
					93.8117
					92.058
					108.324
					93.8117
					112.748
					98.8862
					111.293
					97.2241
					98.8862
					117.004
					100.521
					90.2703
					100.521
					103.713
					93.8117
					97.2241
					97.2241
					93.8117
					90.2703
					97.2241
					105.272
					93.8117
					105.272
					95.5331
					105.272
					106.809
					93.8117
					112.748
					114.184
					108.324
					92.058
					103.713
					90.2703
					114.184
					97.2241
					103.713
					102.129
					102.129
					102.129
					92.058
					115.602
					118.388
					108.324
					106.809
					95.5331
					93.8117
					97.2241
					93.8117
					97.2241
					92.058
					95.5331
					93.8117
					98.8862
					97.2241
					105.272
					103.713
					108.324
					102.129
					112.748
					109.819
					102.129
					100.521
					90.2703
					90.2703
					95.5331
					92.058
					98.8862
					106.809
					100.521
					90.2703
					95.5331
					105.272
					109.819
					93.8117
					100.521
					97.2241
					108.324
					95.5331
					111.293
					103.713
					108.324
					93.8117
					102.129
					105.272
					103.713
					93.8117
					93.8117
					98.8862
					102.129
					93.8117
					90.2703
					103.713
					100.521
					111.293
					103.713
					93.8117
					102.129
					100.521
					103.713
					103.713
					95.5331
					97.2241
					95.5331
					90.2703
					103.713
					98.8862
					106.809
					97.2241
					111.293
					97.2241
					97.2241
					98.8862
					95.5331
					95.5331
					103.713
					119.757
					105.272
					102.129
					102.129
					106.809
					90.2703
					111.293
					95.5331
					92.058
					90.2703
					115.602
					98.8862
					106.809
					93.8117
					93.8117
					98.8862
					100.521
					100.521
					106.809
					90.2703
					112.748
					93.8117
					108.324
					109.819
					97.2241
					92.058
					93.8117
					92.058
					100.521
					97.2241
					98.8862
					92.058
					93.8117
					97.2241
					98.8862
					111.293
					92.058
					97.2241
					106.809
					108.324
					109.819
					98.8862
					98.8862
					109.819
					111.293
					105.272
					117.004
					103.713
					102.129
					92.058
					90.2703
					100.521
					98.8862
					100.521
					97.2241
					100.521
					98.8862
					111.293
					90.2703
					98.8862
					95.5331
					106.809
					111.293
					103.713
					100.521
					98.8862
					98.8862
					108.324
					98.8862
					90.2703
					92.058
					92.058
					102.129
					103.713
					97.2241
					105.272
					97.2241
					98.8862
					98.8862
					106.809
					102.129
					98.8862
					109.819
					102.129
					93.8117
					106.809
					93.8117
					90.2703
					98.8862
					97.2241
					92.058
					105.272
					97.2241
					103.713
					100.521
					95.5331
					100.521
					93.8117
					100.521
					100.521
					92.058
					100.521
					98.8862
					108.324
					98.8862
					102.129
					90.2703
					92.058
					109.819
					102.129
					103.713
					97.2241
					109.819
					92.058
					100.521
					105.272
					90.2703
					92.058
					103.713
					106.809
					108.324
					109.819
					105.272
					93.8117
					102.129
					111.293
					100.521
					106.809
					108.324
					102.129
					100.521
					95.5331
					109.819
					111.293
					97.2241
					98.8862
					92.058
					109.819
					97.2241
					103.713
					114.184
					90.2703
					93.8117
					98.8862
					90.2703
					93.8117
					103.713
					100.521
					100.521
					95.5331
					90.2703
					109.819
					93.8117
					97.2241
					100.521
					93.8117
					100.521
					103.713
					93.8117
					112.748
					103.713
					98.8862
					100.521
					98.8862
					108.324
					117.004
					97.2241
					103.713
					90.2703
					90.2703
					103.713
					105.272
					95.5331
					112.748
					93.8117
					95.5331
					111.293
					102.129
					103.713
					105.272
					97.2241
					98.8862
					97.2241
					103.713
					100.521
					97.2241
					97.2241
					97.2241
					93.8117
					109.819
					95.5331
					112.748
					100.521
					97.2241
					102.129
					98.8862
					97.2241
					103.713
					93.8117
					111.293
					102.129
					95.5331
					98.8862
					102.129
					106.809
					100.521
					105.272
					93.8117
					112.748
					95.5331
					100.521
					103.713
					102.129
					93.8117
					102.129
					109.819
					108.324
					92.058
					90.2703
					111.293
					100.521
					93.8117
					97.2241
					102.129
					100.521
					92.058
					102.129
					102.129
					93.8117
					93.8117
					103.713
					100.521
					92.058
					93.8117
					102.129
					103.713
					92.058
					105.272
					95.5331
					100.521
					100.521
					97.2241
					90.2703
					103.713
					105.272
					97.2241
					93.8117
					103.713
					90.2703
					106.809
					98.8862
					90.2703
					93.8117
					97.2241
					105.272
					102.129
					95.5331
					98.8862
					97.2241
					100.521
					102.129
					92.058
					93.8117
					90.2703
					90.2703
					102.129
					108.324
					106.809
					97.2241
					90.2703
					105.272
					97.2241
					115.602
					106.809
					97.2241
					100.521
					97.2241
					95.5331

## Sheet: A Bolivia
Filamentous length	Filamentous persistence length	Small filamentous length	Large spherical radius	Large spherical equivalent radius	Small spherical radius	Unknown equivalent radius	Rod length	Rod diameter
226.274		77.2548	74.4356	125.082	92.058	92.058
154.51		122.51	96.701	153.194	98.8862	163.487
205.255		109.255		95.5331	102.129	93.8117
250.51	73.6906	186.51	87.8171	133.893	102.129	127.662
231.765		218.51	83.5647	126.378	90.2703	126.378
501.019	150.525	77.2548	63.7846	98.8862	92.058	118.388
277.019		109.255	88.714	127.662	92.058	115.602
213.019		263.764	76.502	146.672	92.058	119.757
354.274		154.51		90.2703	90.2703	97.2241
327.765		96	77.5245	117.004	90.2703	122.449
604.784	2603.47	77.2548	73.5201	125.082	95.5331	93.8117
327.764	51.173	167.764	95.965	141.007	95.5331	159.449
471.293	31.8736	141.255		97.2241	95.5331	92.058
327.764		109.255		92.058	108.324	143.3
141.255		122.51		92.058	95.5331	117.004
263.765	121.054	154.51		103.713	102.129	131.436
237.255		173.255	65.949	118.388	95.5331	126.378
199.765	170.574	154.51		97.2241	95.5331	106.809
354.274		167.765	71.8833	118.388	98.8862	126.378
295.764	286.484	128	8.9647e+11	93.8117	95.5331	135.104
410.51	33.0678	218.51	55.5957	92.058	106.809	118.388
412.784	92.0099	96	68.0249	106.809	97.2241	92.058
231.764		109.255	1.10376e+15	95.5331	93.8117	92.058
346.51		160	11.4141	122.449	93.8117	100.521
405.019	15959.3	141.255		95.5331	92.058	95.5331
245.019	132.264	173.255		95.5331	90.2703	97.2241
154.51		109.255		118.388	92.058	98.8862
327.765	165.594	122.51	73.8104	109.819	95.5331	97.2241
604.784	3389.03	90.5097	78.586	117.004	93.8117	95.5331
245.019	14.4152	141.255	79.6572	132.67	90.2703	117.004
322.274		205.255	63.1976	118.388	97.2241	128.932
167.764		213.019	77.2264	133.893	95.5331	93.8117
263.765		263.765	8404.61	102.129	100.521	90.2703
173.255		186.51		97.2241	92.058	102.129
213.019		173.255	75.1269	118.388	90.2703	97.2241
224	82.1524	135.764		128.932	98.8862	98.8862
245.019		263.765		90.2703	95.5331	205.848
122.51		109.255		92.058	90.2703	92.058
463.529	962.609	96	61.8202	95.5331	108.324	122.449
463.529	14.4965	122.51	91.0975	131.436	95.5331	153.194
295.765	63.2355	109.255	356.344	95.5331	100.521	97.2241
245.019	42986.8	199.765	65.6669	133.893	90.2703	92.058
154.51		135.764	337.712	95.5331	93.8117	121.11
721.803	1298.24	192	111.154	166.45	93.8117	157.392
450.274	146.776	122.51		100.521	103.713	136.305
708.548	75.9135	237.255	87.9964	127.662	98.8862	92.058
450.274	45.7352	122.51	81.8264	119.757	92.058	92.058
186.51		186.51	78.5659	117.004	90.2703	109.819
167.765		199.765	56.4596	93.8117	98.8862	90.2703
380.784	834.222	282.51	89.9788	133.893	90.2703	125.082
250.51		96		90.2703	105.272	93.8117
295.764		173.255		102.129	93.8117	142.158
154.51		128	67.3274	105.272	97.2241	179.636
463.529		128		93.8117	97.2241	186.753
309.019	801999	154.51	56.163	90.2703	102.129	119.757
135.764		192	56.1306	95.5331	95.5331	137.496
335.529	9949.72	231.764		90.2703	93.8117	112.748
205.255		186.51	97.5654	131.436	92.058	137.496
167.764		269.255	74.2635	117.004	92.058	152.126
322.274		141.255	59.3936	93.8117	103.713	98.8862
109.255		109.255	72.6481	114.184	92.058	115.602
309.019	259.187	309.019	31634.7	92.058	90.2703	106.809
322.274		141.255	78.3913	128.932	98.8862	138.676
135.764		141.255	87.5157	128.932	95.5331	97.2241
213.019		128		90.2703	97.2241	137.496
109.255		231.764	96.662	153.194	95.5331	98.8862
418.274	134.952	109.255		90.2703	97.2241	93.8117
327.764	203.394	218.51	81.7517	123.772	92.058	93.8117
476.784	2085.27	192		100.521	90.2703	92.058
333.255	1266.16	181.019	88.4353	127.662	98.8862	95.5331
218.51		141.255	55.8301	90.2703	106.809	90.2703
295.765		154.51		118.388	92.058	93.8117
693.019	178.177	109.255	84.9168	122.449	93.8117	119.757
141.255		96		97.2241	100.521	97.2241
173.255		96	90.2939	133.893	90.2703	158.424
245.019		96		98.8862	98.8862	151.051
218.51		109.255		93.8117	98.8862	131.436
199.765		186.51		92.058	90.2703	98.8862
186.51		90.5097	59.0183	93.8117	93.8117	122.449
490.039	949.754	154.51		92.058	90.2703	98.8862
359.764	772.228	173.255		95.5331	90.2703	121.11
250.51		96	62.4411	103.713	95.5331	100.521
373.019		128	94.055	141.007	98.8862	177.812
367.529		186.51	63.228	103.713	92.058	156.353
141.255		77.2548	85.1269	122.449	95.5331	508.728
186.51		160		93.8117	90.2703	117.004
322.274		295.764	78.9985	152.126	90.2703	121.11
186.51		141.255	71.0036	115.602	90.2703	128.932
199.764		122.51		100.521	97.2241	138.676
205.255		122.51	78.6528	131.436	95.5331	90.2703
282.51	14.3351	173.255		95.5331	90.2703	103.713
437.019	53.1866	186.51	58.3977	95.5331	90.2703	92.058
322.274	73.454	154.51	100.498	144.433	95.5331	149.968
277.019		199.765	87.0156	132.67	97.2241	100.521
263.764		154.51	71.2879	105.272	98.8862	90.2703
141.255		263.765	73.1708	114.184	93.8117	105.272
173.255		213.019	36.5022	136.305	93.8117	95.5331
373.019	51085.6	186.51	84.1388	127.662	92.058	138.676
154.51		173.255	78.7903	128.932	93.8117	128.932
309.019		167.764		92.058	95.5331	100.521
263.765		186.51	71.5283	118.388	115.602	138.676
320	92.5044	391.764	66.7879	106.809	97.2241	117.004
277.019	1725.12	224	77.7241	144.433	93.8117	191.917
205.255		141.255	78.6281	118.388	108.324	125.082
335.529		205.255		115.602	97.2241	149.968
591.529	301.054	109.255	70.5511	142.158	90.2703	127.662
186.51		205.255	64.1119	98.8862	90.2703	92.058
135.764		96		92.058	97.2241	125.082
205.255		90.5097	80.1514	118.388	93.8117	98.8862
410.51	106559	122.51	78.1685	135.104	106.809	103.713
160		128	73.4364	111.293	95.5331	118.388
237.255		154.51	91.9042	132.67	92.058	127.662
231.764		141.255		103.713	92.058	108.324
245.019		231.765		98.8862	90.2703	92.058
192		160	76.6044	119.757	95.5331	127.662
295.764	59.2151	231.764	77.0689	109.819	100.521	114.184
397.255	27.7756	77.2548	74.0594	117.004	98.8862	123.772
154.51		128	76.8739	123.772	90.2703	135.104
154.51		245.019	113.318	153.194	98.8862	131.436
154.51		109.255		119.757	90.2703	118.388
237.255		141.255	77.1173	127.662	102.129	119.757
213.019		128		95.5331	95.5331	97.2241
263.764		96		102.129	92.058	122.449
354.274		218.51	82.4218	121.11	98.8862	108.324
354.274		173.255	75.4471	117.004	90.2703	93.8117
199.765		45.2548	58.3887	93.8117	103.713	102.129
192		96	175.412	252.111	97.2241	121.11
309.019		167.765	59.7716	93.8117	93.8117	95.5331
186.51		173.255		95.5331	92.058	119.757
546.274	128.872	154.51	59.6025	93.8117	90.2703	128.932
181.019		269.255		92.058	108.324	90.2703
314.51	129.997	231.765	70.6668	118.388	108.324	98.8862
199.765		128	73.8989	121.11	90.2703	97.2241
231.765		295.764	75.2462	125.082	100.521	175.969
359.764	156.809	154.51	77.4349	117.004	102.129	132.67
263.764		109.255		97.2241	109.819
154.51		218.51	64.0236	105.272	90.2703
423.764	114.662	154.51	73.3724	115.602	92.058
836.548	2319.02	309.019	59.5047	98.8862	90.2703
224		218.51	64.3193	102.129	92.058
231.765		141.255		100.521	102.129
250.51	874.999	64	66.2115	111.293	92.058
290.274		224	59.4521	97.2241	93.8117
263.764	12.4583	154.51	102.181	160.468	106.809
346.51	124.14	173.255		109.819	100.521
327.764	32.1789	109.255		105.272	93.8117
173.255		109.255	97.882	147.779	92.058
160		213.019	73.9782	121.11	90.2703
580.548	52.7373	173.255		97.2241	92.058
780.313	1539.75	109.255	311.556	90.2703	92.058
199.764		186.51	66.1735	103.713	92.058
245.019			60.3455	100.521	93.8117
282.51	19.3252		-2.3432e+23	92.058	97.2241
186.51			62.3887	97.2241	92.058
476.784	651.296		74.4035	114.184	90.2703
559.529	1669.37		66.4332	103.713	90.2703
263.764	47.8114		55.7403	92.058	93.8117
199.765			63.2391	97.2241	97.2241
237.255				92.058	95.5331
173.255			62.0009	109.819	97.2241
205.255			61.4919	95.5331	95.5331
263.765				90.2703	98.8862
277.019	178327		84.7198	127.662	93.8117
282.51			82.6867	126.378	92.058
359.764	15.06		94.0603	139.846	97.2241
231.765			64.218	105.272	97.2241
322.274	4679.92		93.9912	137.496	92.058
444.784	267.888			93.8117	95.5331
213.019	273.76		57.3614	95.5331	98.8862
186.51			75.4475	118.388	92.058
359.764			61.0596	98.8862	98.8862
250.51				103.713	105.272
122.51			56.8396	90.2703	93.8117
218.51	22.9992		109.741	161.48	97.2241
186.51				97.2241	92.058
237.255				92.058	92.058
258.274	187.078		55.8101	97.2241	95.5331
320	8018.66		80.4036	125.082	100.521
186.51			60.6975	97.2241	93.8117
258.274			60.3416	98.8862	103.713
250.51			56.2468	98.8862	97.2241
373.019	221.575		332.202	95.5331	92.058
213.019				92.058	95.5331
263.765	4665.9			97.2241	92.058
604.784	52.2051		59.1153	98.8862	90.2703
245.019			67.0086	115.602	95.5331
314.51	25.6849		115.479	160.468	98.8862
373.019	19.5853		60.9282	97.2241	103.713
167.764			104.746	165.468	98.8862
263.764			73.3562	111.293	97.2241
109.255			61.7092	98.8862	95.5331
186.51			76.3446	117.004	90.2703
277.019				90.2703	115.602
309.019	8005.19		156.443	197.772	102.129
482.274	1251.3			92.058	98.8862
213.019			69.5012	117.004	90.2703
231.765				100.521	90.2703
277.019			72.0416	109.819	98.8862
263.765			77.9612	123.772	95.5331
335.529	16.1124		76.0937	119.757	93.8117
250.51	84.6252		60.2764	98.8862	92.058
231.765				90.2703	90.2703
405.019	291.438		5159.51	111.293	97.2241
271.529	165924			90.2703	106.809
322.274			60.796	97.2241	92.058
367.529	42.7311		74.5424	132.67	98.8862
373.019	126.29		76.907	121.11	102.129
263.765			95.4796	146.672	90.2703
269.255	146.121		127.342	221.116	93.8117
277.019	198.39		342.315	95.5331	95.5331
418.274	33.4096		69.9883	123.772	93.8117
263.765			96.9538	132.67	92.058
277.019	116.587		332.271	93.8117	92.058
231.765				93.8117	97.2241
277.019			75.4785	119.757	112.748
418.274	197647		65.1148	118.388	97.2241
322.274	99.9763			103.713	98.8862
186.51				98.8862	90.2703
231.764				97.2241	97.2241
327.764	8.07014		75.1149	119.757	92.058
578.274	523.499		61.6729	121.11	90.2703
258.274			82.3471	122.449	108.324
167.765			77.932	117.004	90.2703
322.274	5435.69		77.3298	123.772	92.058
277.019	42.5177			106.809	111.293
391.764	64.6607		78.0139	114.184	97.2241
205.255				102.129	92.058
			62.9035	102.129	98.8862
			79.372	152.126	95.5331
				125.082	92.058
			56.0312	90.2703	98.8862
			58.5095	95.5331	106.809
				103.713	97.2241
			87.7703	123.772	97.2241
				98.8862	106.809
			81.048	122.449	105.272
			98.9052	155.307	90.2703
				90.2703	100.521
			11.5437	133.893	92.058
			71.7283	109.819	97.2241
			66.5568	100.521	90.2703
			38.3475	149.968	95.5331
			79.0573	121.11	92.058
			69.6883	121.11	92.058
			77.9354	126.378	90.2703
				97.2241	92.058
				92.058	103.713
			54.8811	90.2703	100.521
				98.8862	109.819
			70.4127	106.809	102.129
					97.2241
					93.8117
					105.272
					95.5331
					93.8117
					90.2703
					97.2241
					93.8117
					90.2703
					92.058
					90.2703
					97.2241
					97.2241
					93.8117
					90.2703
					90.2703
					93.8117
					93.8117
					90.2703
					97.2241
					92.058
					95.5331
					98.8862
					90.2703
					92.058
					95.5331
					98.8862
					90.2703
					90.2703
					100.521
					95.5331
					92.058
					92.058
					90.2703
					97.2241
					92.058
					90.2703
					90.2703
					93.8117
					95.5331
					90.2703
					103.713
					90.2703
					90.2703
					93.8117
					90.2703
					95.5331
					92.058
					90.2703
					90.2703
					97.2241
					100.521
					95.5331
					90.2703
					97.2241
					90.2703
					98.8862
					95.5331
					90.2703
					92.058
					95.5331
					111.293
					95.5331
					92.058
					92.058
					97.2241
					95.5331
					93.8117
					90.2703
					92.058
					100.521
					108.324
					90.2703
					92.058
					117.004
					90.2703
					93.8117
					90.2703
					93.8117
					93.8117
					92.058
					97.2241
					98.8862
					97.2241
					95.5331
					98.8862
					97.2241
					90.2703
					97.2241
					90.2703
					92.058
					93.8117
					90.2703
					98.8862
					98.8862
					98.8862
					97.2241
					100.521
					93.8117
					95.5331
					90.2703
					98.8862
					93.8117
					90.2703
					93.8117
					90.2703
					93.8117
					97.2241
					93.8117
					95.5331
					92.058
					92.058
					90.2703
					93.8117
					92.058
					90.2703
					95.5331
					100.521
					90.2703
					97.2241
					103.713
					92.058
					112.748
					92.058
					93.8117
					92.058
					97.2241
					95.5331
					93.8117
					95.5331
					90.2703
					90.2703
					92.058
					100.521
					90.2703
					93.8117
					108.324
					109.819
					109.819
					90.2703
					97.2241
					98.8862
					111.293
					105.272
					95.5331
					95.5331
					95.5331
					92.058
					98.8862
					93.8117
					93.8117
					95.5331
					90.2703
					93.8117
					90.2703
					90.2703
					100.521
					102.129
					97.2241
					93.8117
					90.2703
					98.8862
					93.8117
					92.058
					108.324
					92.058
					90.2703
					109.819
					93.8117
					95.5331
					90.2703
					100.521
					97.2241
					100.521
					92.058
					98.8862
					93.8117
					90.2703
					93.8117
					95.5331
					93.8117
					93.8117
					90.2703
					93.8117
					93.8117
					93.8117
					93.8117
					92.058
					102.129
					92.058
					115.602
					90.2703
					102.129
					90.2703
					97.2241
					105.272
					102.129
					98.8862
					105.272
					90.2703
					95.5331
					90.2703
					106.809
					95.5331
					95.5331
					93.8117
					90.2703
					95.5331
					92.058
					105.272
					98.8862
					100.521
					90.2703
					92.058
					90.2703
					90.2703
					93.8117
					100.521
					93.8117
					95.5331
					98.8862
					114.184
					90.2703
					97.2241
					90.2703
					93.8117
					90.2703
					92.058
					105.272
					90.2703
					92.058
					95.5331
					93.8117
					90.2703
					92.058
					92.058
					93.8117
					92.058
					92.058
					93.8117
					92.058
					93.8117
					92.058
					95.5331
					98.8862
					90.2703
					90.2703
					92.058
					92.058
					92.058
					92.058
					93.8117
					98.8862
					92.058
					103.713
					97.2241
					93.8117
					90.2703
					90.2703
					100.521
					90.2703
					92.058
					95.5331
					112.748
					95.5331
					108.324
					93.8117
					95.5331
					90.2703
					97.2241
					90.2703
					92.058
					97.2241
					95.5331
					90.2703
					90.2703
					90.2703
					97.2241
					98.8862
					95.5331
					100.521
					92.058
					97.2241
					90.2703
					93.8117
					92.058
					109.819
					95.5331
					95.5331
					92.058
					93.8117
					90.2703
					98.8862
					98.8862
					108.324
					105.272
					90.2703
					95.5331
					97.2241
					90.2703
					95.5331
					105.272
					93.8117
					92.058
					92.058
					90.2703
					95.5331
					97.2241
					92.058
					90.2703
					102.129
					95.5331
					100.521
					98.8862
					108.324
					92.058
					103.713
					92.058
					102.129
					90.2703
					97.2241
					95.5331
					90.2703
					98.8862
					90.2703
					98.8862
					95.5331
					92.058
					90.2703
					90.2703
					103.713
					93.8117
					115.602
					98.8862
					97.2241
					100.521
					102.129
					97.2241
					97.2241
					90.2703
					100.521
					98.8862
					90.2703
					90.2703
					90.2703
					95.5331
					93.8117
					90.2703
					97.2241
					95.5331
					97.2241
					95.5331
					97.2241
					100.521
					92.058
					90.2703
					93.8117
					105.272
					92.058
					93.8117
					117.004
					97.2241
					92.058
					97.2241
					102.129
					90.2703
					90.2703
					98.8862
					93.8117
					100.521
					92.058
					93.8117
					93.8117
					92.058
					92.058
					105.272
					93.8117
					97.2241
					105.272
					97.2241
					100.521
					95.5331
					102.129
					93.8117
					95.5331
					100.521
					90.2703
					102.129
					90.2703
					97.2241
					97.2241
					95.5331
					97.2241
					97.2241
					97.2241
					97.2241
					90.2703
					117.004
					90.2703
					97.2241
					95.5331
					92.058
					95.5331
					100.521
					90.2703
					90.2703
					90.2703
					93.8117
					92.058
					98.8862
					90.2703
					90.2703
					92.058
					103.713
					97.2241
					93.8117
					95.5331
					103.713
					90.2703
					98.8862
					95.5331
					90.2703
					92.058
					90.2703
					95.5331
					108.324
					92.058
					93.8117
					95.5331
					92.058
					90.2703
					90.2703
					93.8117
					92.058
					108.324
					98.8862
					111.293
					90.2703
					90.2703
					93.8117
					92.058
					97.2241
					100.521
					117.004
					92.058
					90.2703
					90.2703
					90.2703
					93.8117
					93.8117
					90.2703
					106.809
					92.058
					93.8117
					97.2241
					92.058
					98.8862
					102.129
					98.8862
					92.058
					93.8117
					103.713
					93.8117
					93.8117
					90.2703
					95.5331
					92.058
					108.324
					92.058
					90.2703
					98.8862
					93.8117
					100.521
					93.8117
					90.2703
					102.129
					90.2703
					92.058
					90.2703
					102.129
					92.058
					103.713
					92.058
					92.058
					93.8117
					95.5331
					98.8862
					97.2241
					95.5331
					93.8117
					97.2241
					98.8862
					92.058
					103.713
					93.8117
					95.5331
					95.5331
					114.184
					97.2241
					97.2241
					90.2703
					93.8117
					90.2703
					98.8862
					90.2703
					95.5331
					92.058
					93.8117
					106.809
					90.2703
					97.2241
					93.8117
					92.058
					97.2241
					92.058
					97.2241
					100.521
					93.8117
					92.058
					90.2703
					97.2241
					90.2703
					90.2703
					90.2703
					90.2703
					92.058
					92.058
					108.324
					90.2703
					105.272
					100.521
					90.2703
					92.058
					98.8862
					93.8117
					92.058
					93.8117
					97.2241
					90.2703
					92.058
					90.2703
					97.2241
					90.2703
					90.2703
					98.8862
					97.2241
					90.2703
					95.5331
					95.5331
					97.2241
					92.058
					93.8117
					93.8117
					90.2703
					90.2703
					90.2703
					95.5331
					95.5331
					100.521
					92.058
					90.2703
					92.058
					100.521
					92.058
					106.809
					90.2703
					97.2241
					92.058
					92.058
					92.058
					102.129
					93.8117
					90.2703
					102.129
					92.058
					93.8117
					90.2703
					100.521
					109.819
					97.2241
					100.521
					90.2703
					109.819
					92.058
					93.8117
					102.129
					92.058
					97.2241
					93.8117
					90.2703
					100.521
					93.8117
					95.5331
					92.058
					90.2703
					100.521
					98.8862
					109.819
					95.5331
					93.8117
					106.809
					97.2241
					92.058
					98.8862
					95.5331
					90.2703
					90.2703
					95.5331
					98.8862
					93.8117
					90.2703
					95.5331
					95.5331
					103.713
					92.058
					97.2241
					90.2703
					98.8862
					95.5331
					97.2241
					92.058
					92.058
					97.2241
					90.2703
					109.819
					95.5331
					92.058
					93.8117
					105.272
					92.058
					93.8117
					93.8117
					93.8117
					92.058
					100.521
					93.8117
					106.809
					97.2241
					90.2703
					97.2241
					100.521
					93.8117
					112.748
					90.2703
					95.5331
					90.2703
					112.748
					102.129
					90.2703
					102.129
					92.058
					93.8117
					97.2241
					92.058
					98.8862
					95.5331
					95.5331
					92.058
					92.058
					93.8117
					90.2703
					93.8117
					93.8117
					93.8117
					92.058
					106.809
					92.058
					97.2241
					90.2703
					90.2703
					90.2703
					93.8117
					93.8117
					90.2703
					97.2241
					92.058
					106.809
					98.8862
					95.5331
					115.602
					95.5331
					111.293
					97.2241
					100.521
					92.058
					98.8862
					98.8862
					93.8117
					90.2703
					102.129
					93.8117
					90.2703
					100.521
					102.129
					90.2703
					93.8117
					98.8862
					109.819
					90.2703
					95.5331
					102.129
					98.8862
					97.2241
					93.8117
					92.058
					90.2703
					93.8117
					90.2703
					97.2241
					108.324
					92.058
					92.058
					97.2241
					106.809
					106.809
					95.5331
					105.272
					97.2241
					92.058
					90.2703
					90.2703
					92.058
					98.8862
					102.129
					100.521
					98.8862
					95.5331
					92.058
					105.272
					109.819
					90.2703
					98.8862
					95.5331
					98.8862
					102.129
					93.8117
					105.272
					100.521
					93.8117
					93.8117
					90.2703
					92.058
					103.713
					92.058
					98.8862
					90.2703
					95.5331
					92.058
					95.5331
					90.2703
					93.8117
					93.8117
					97.2241
					93.8117
					95.5331
					95.5331
					90.2703
					92.058
					90.2703
					95.5331
					90.2703
					90.2703
					90.2703
					103.713
					90.2703
					90.2703
					111.293
					98.8862
					95.5331
					93.8117
					100.521
					93.8117
					103.713
					93.8117
					92.058
					92.058
					92.058
					93.8117
					93.8117
					90.2703
					93.8117
					98.8862
					93.8117
					98.8862
					95.5331
					97.2241
					97.2241
					100.521
					102.129
					92.058
					97.2241
					90.2703
					95.5331
					90.2703
					93.8117
					98.8862
					97.2241
					93.8117
					92.058
					95.5331
					90.2703
					98.8862
					97.2241
					92.058
					103.713
					90.2703
					93.8117
					100.521
					106.809
					93.8117
					90.2703
					90.2703
					95.5331
					95.5331
					105.272
					90.2703
					93.8117
					92.058
					98.8862
					90.2703
					92.058
					93.8117
					93.8117
					95.5331
					98.8862
					98.8862
					97.2241
					92.058
					97.2241
					90.2703
					95.5331
					115.602
					100.521
					97.2241
					90.2703
					90.2703
					92.058
					112.748
					95.5331
					100.521
					92.058
					98.8862
					95.5331
					106.809
					92.058
					97.2241
					103.713
					98.8862
					95.5331
					93.8117
					92.058
					90.2703
					90.2703
					90.2703
					100.521
					93.8117
					103.713
					90.2703
					95.5331
					105.272
					100.521
					97.2241
					103.713
					92.058
					93.8117
					92.058
					97.2241
					92.058
					92.058
					97.2241
					102.129
					92.058
					95.5331
					90.2703
					92.058
					90.2703
					92.058
					106.809
