# Supplementary figures and images for: Structured illumination microscopy combined with machine learning enables the high throughput analysis and classification of virus structure
Source: eLife journal article supplement (doi:10.7554/elife.40183), 2018-12-13

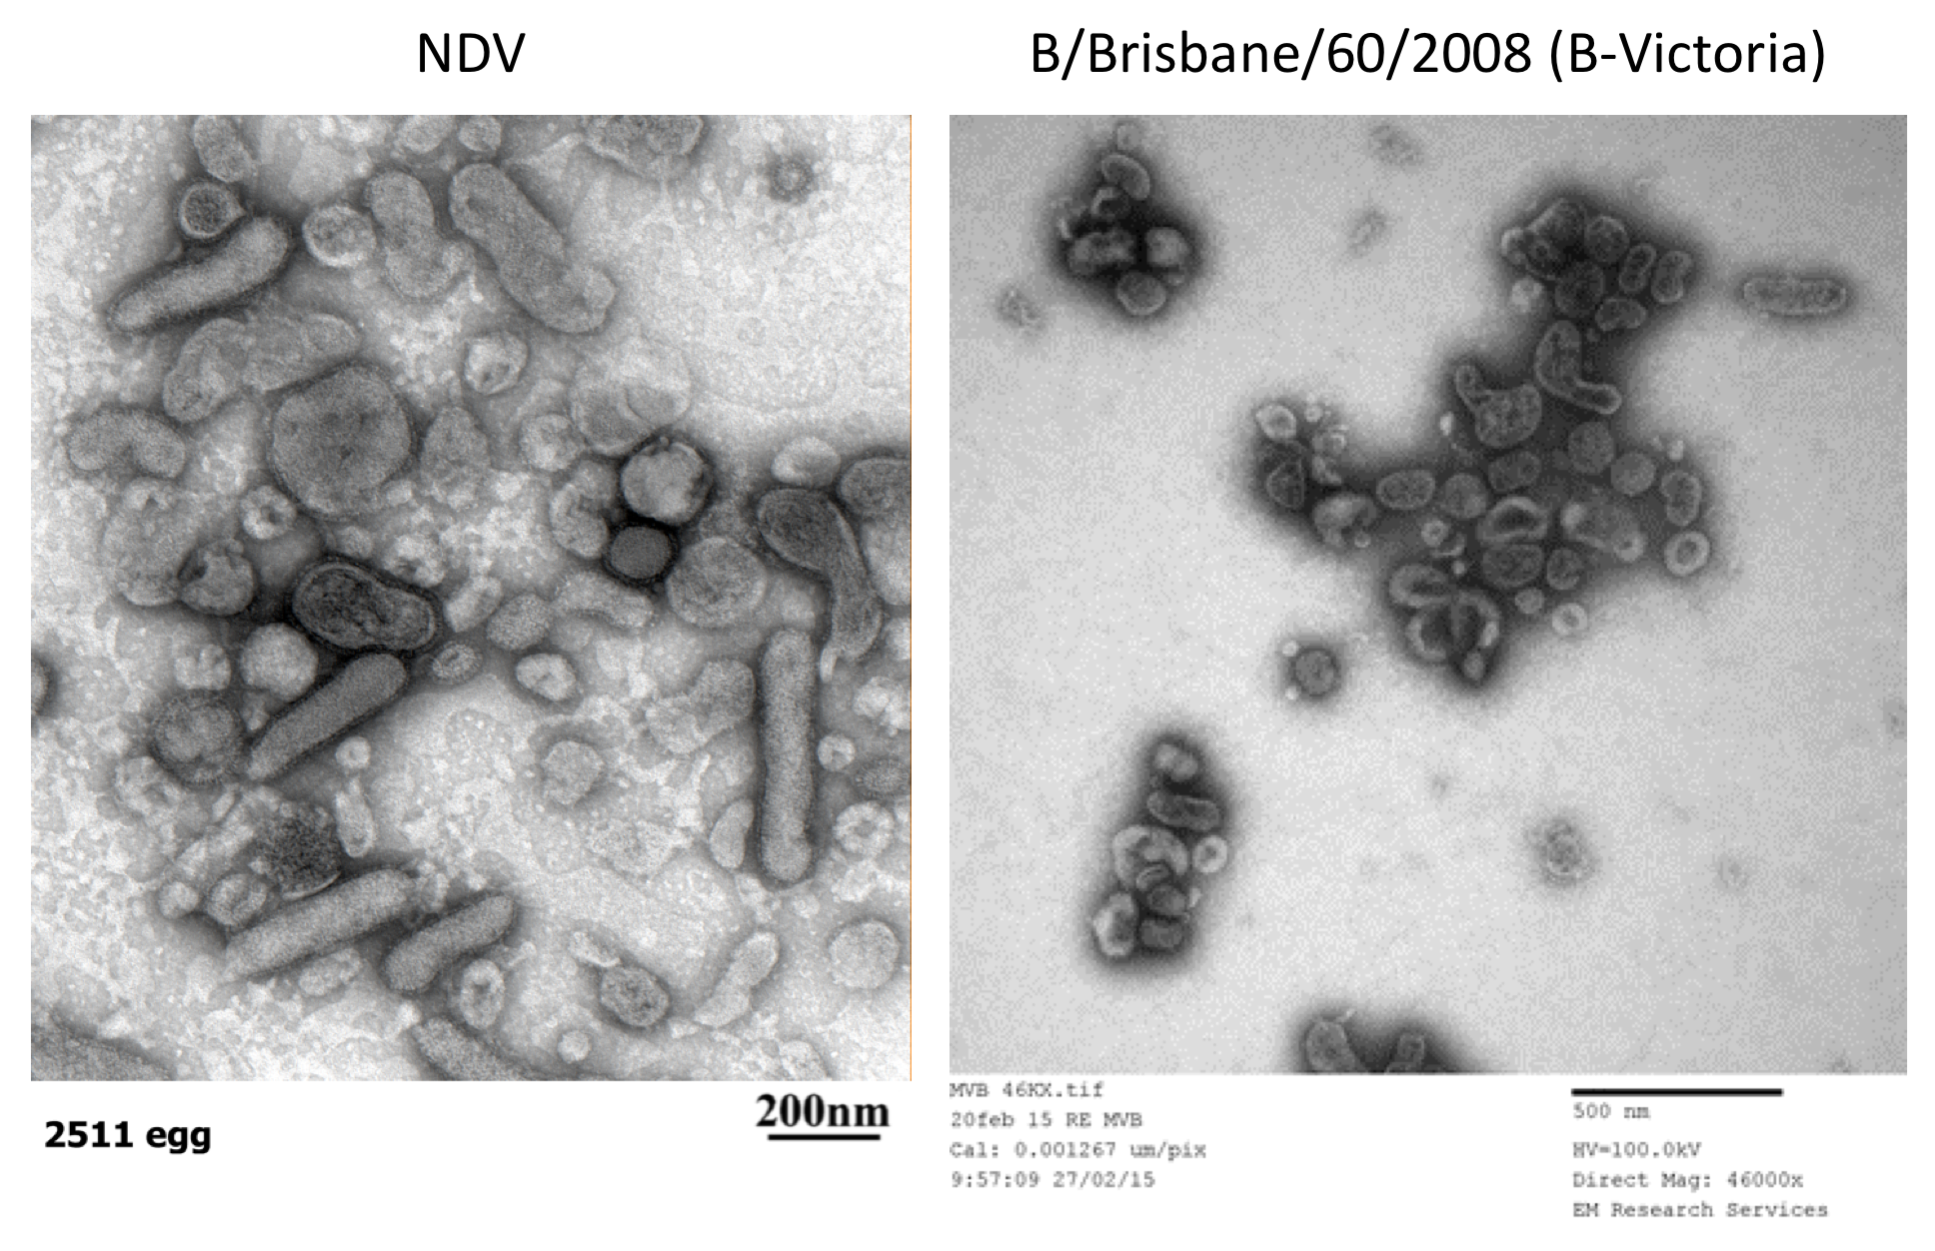

Supplement: supp [file elife-40183-supp-v1.zip › elife_poa_e40183_Figure_1_figure_supplement_2.tif]

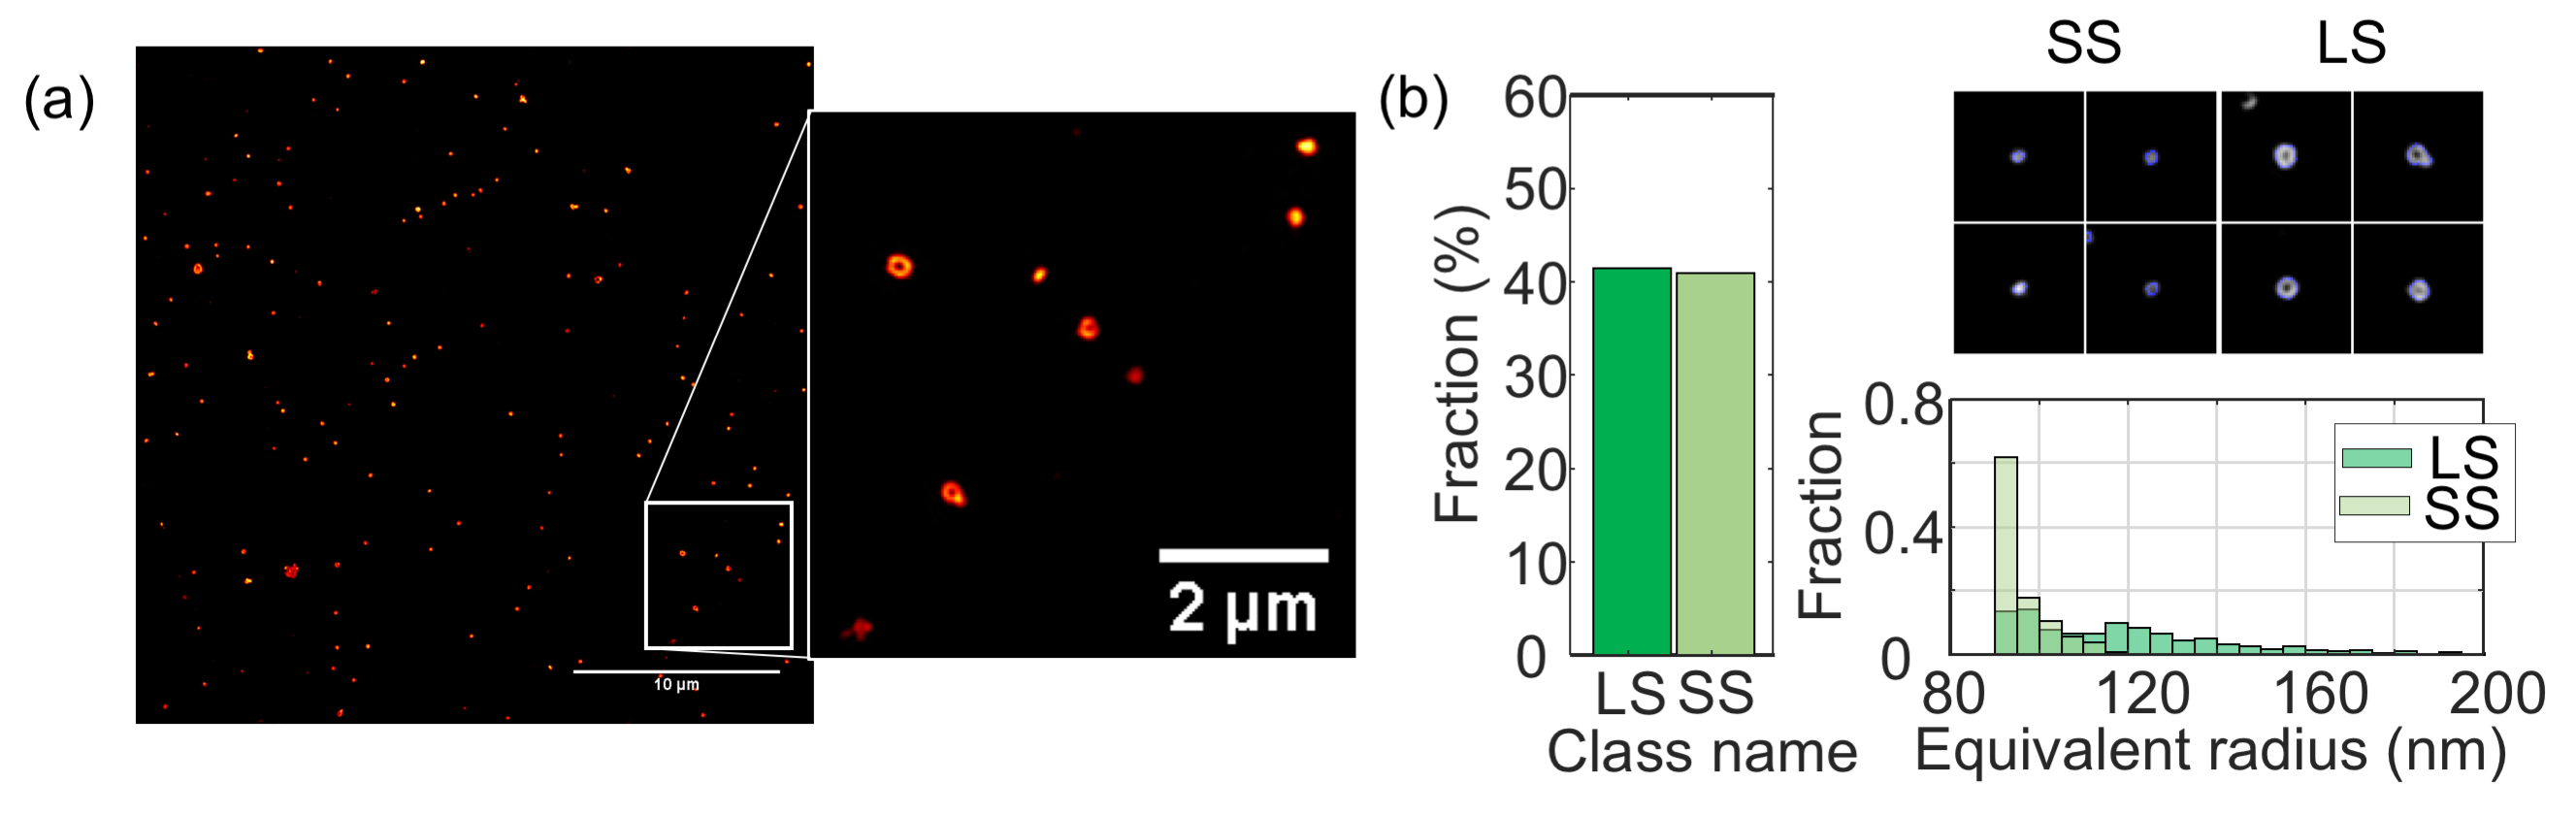

Supplement: supp [file elife-40183-supp-v1.zip › elife_poa_e40183_Figure_5_figure_supplement_1.tif]

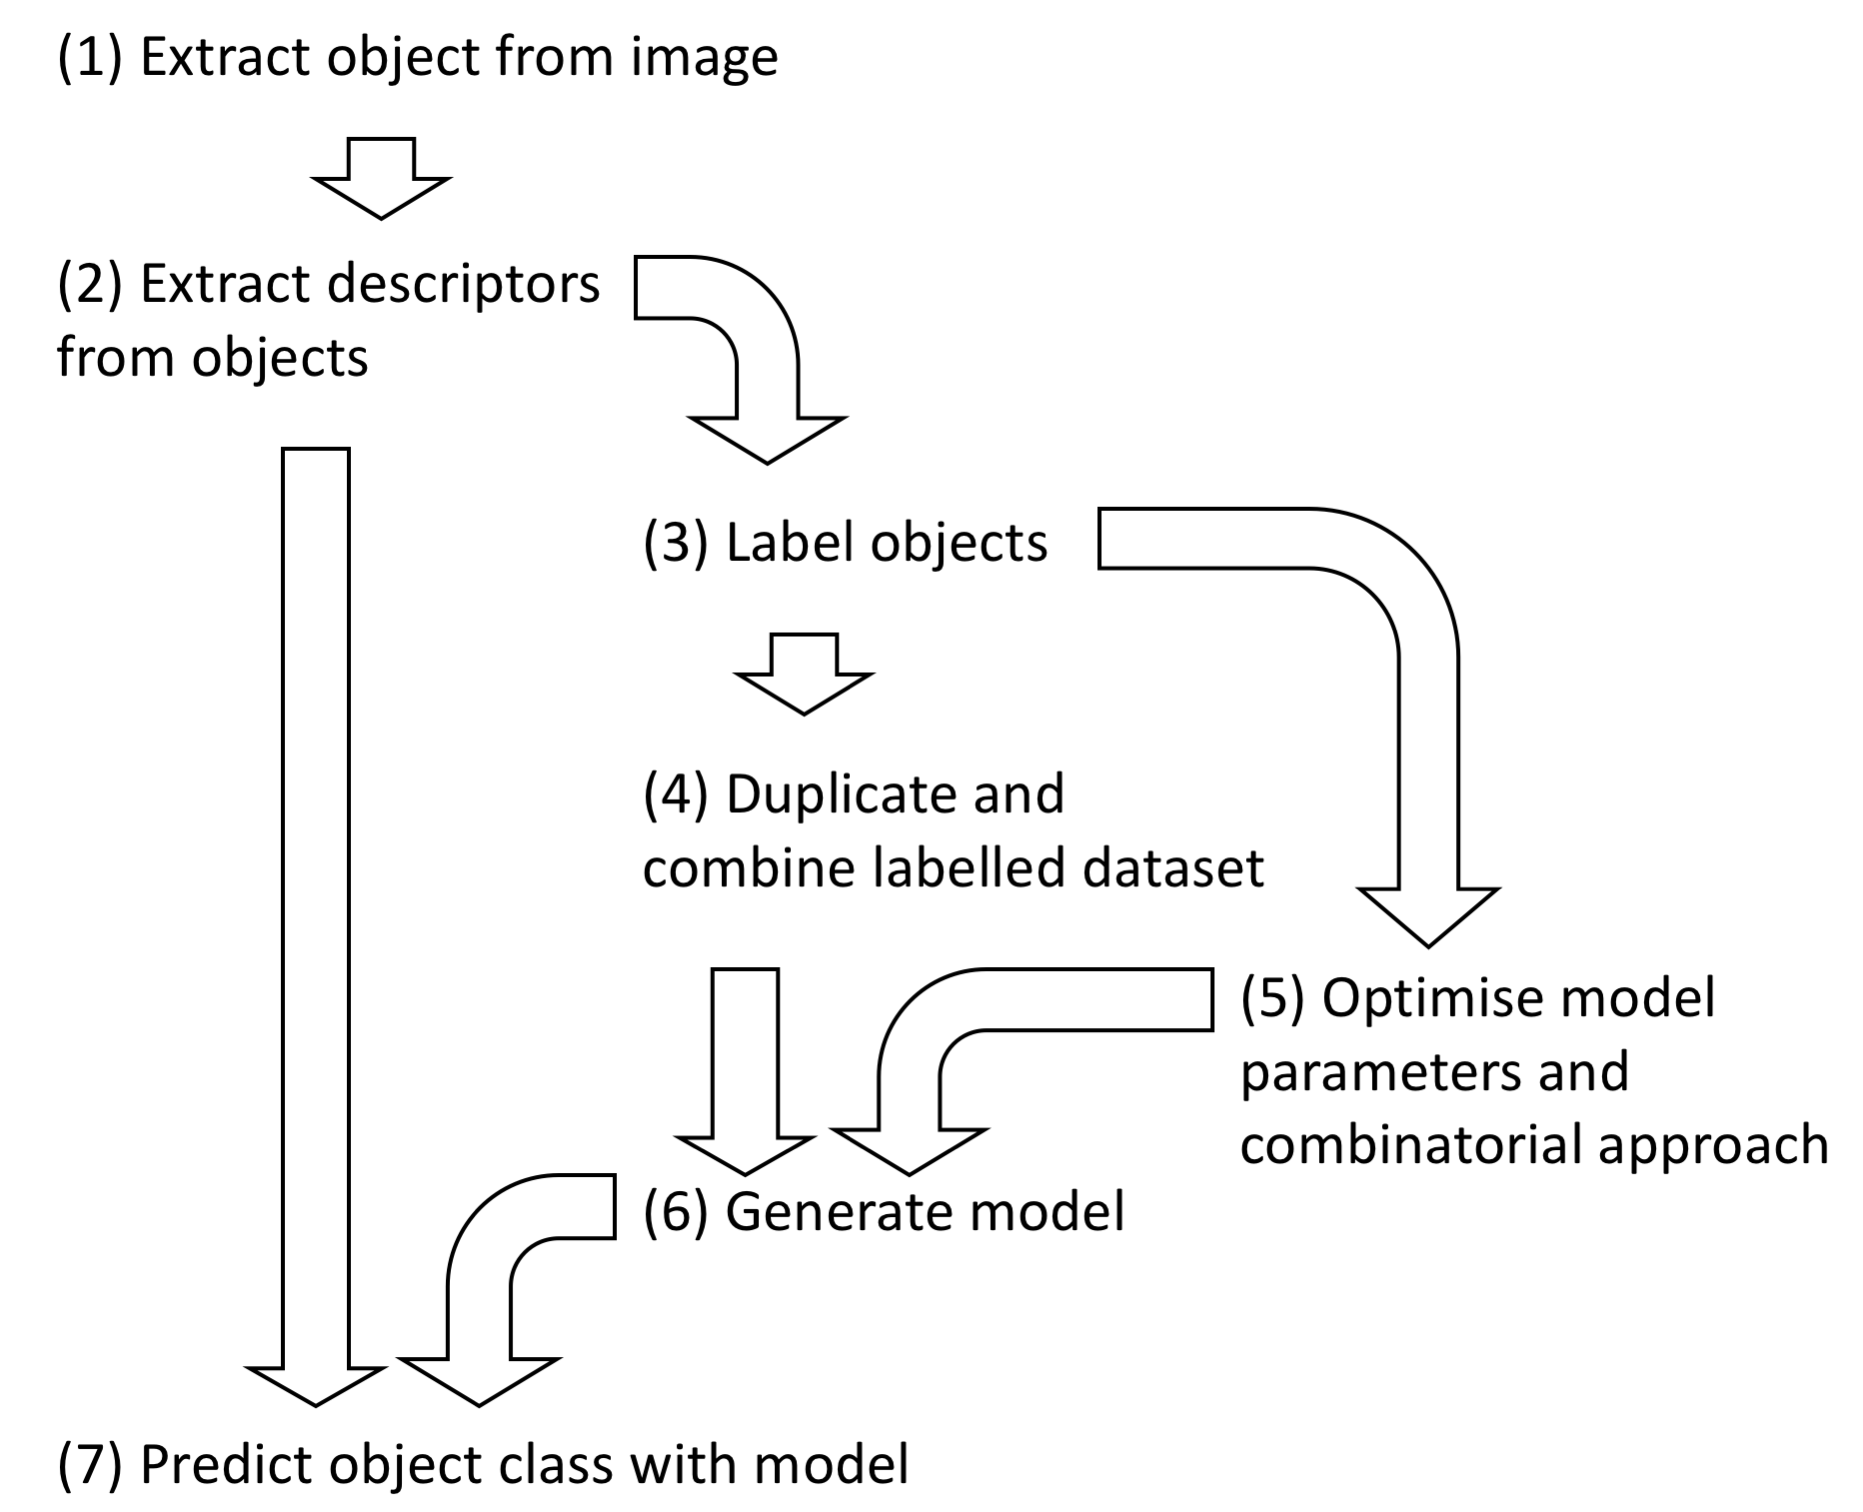

Supplement: supp [file elife-40183-supp-v1.zip › elife_poa_e40183_Figure_3_figure_supplement_1.tif]

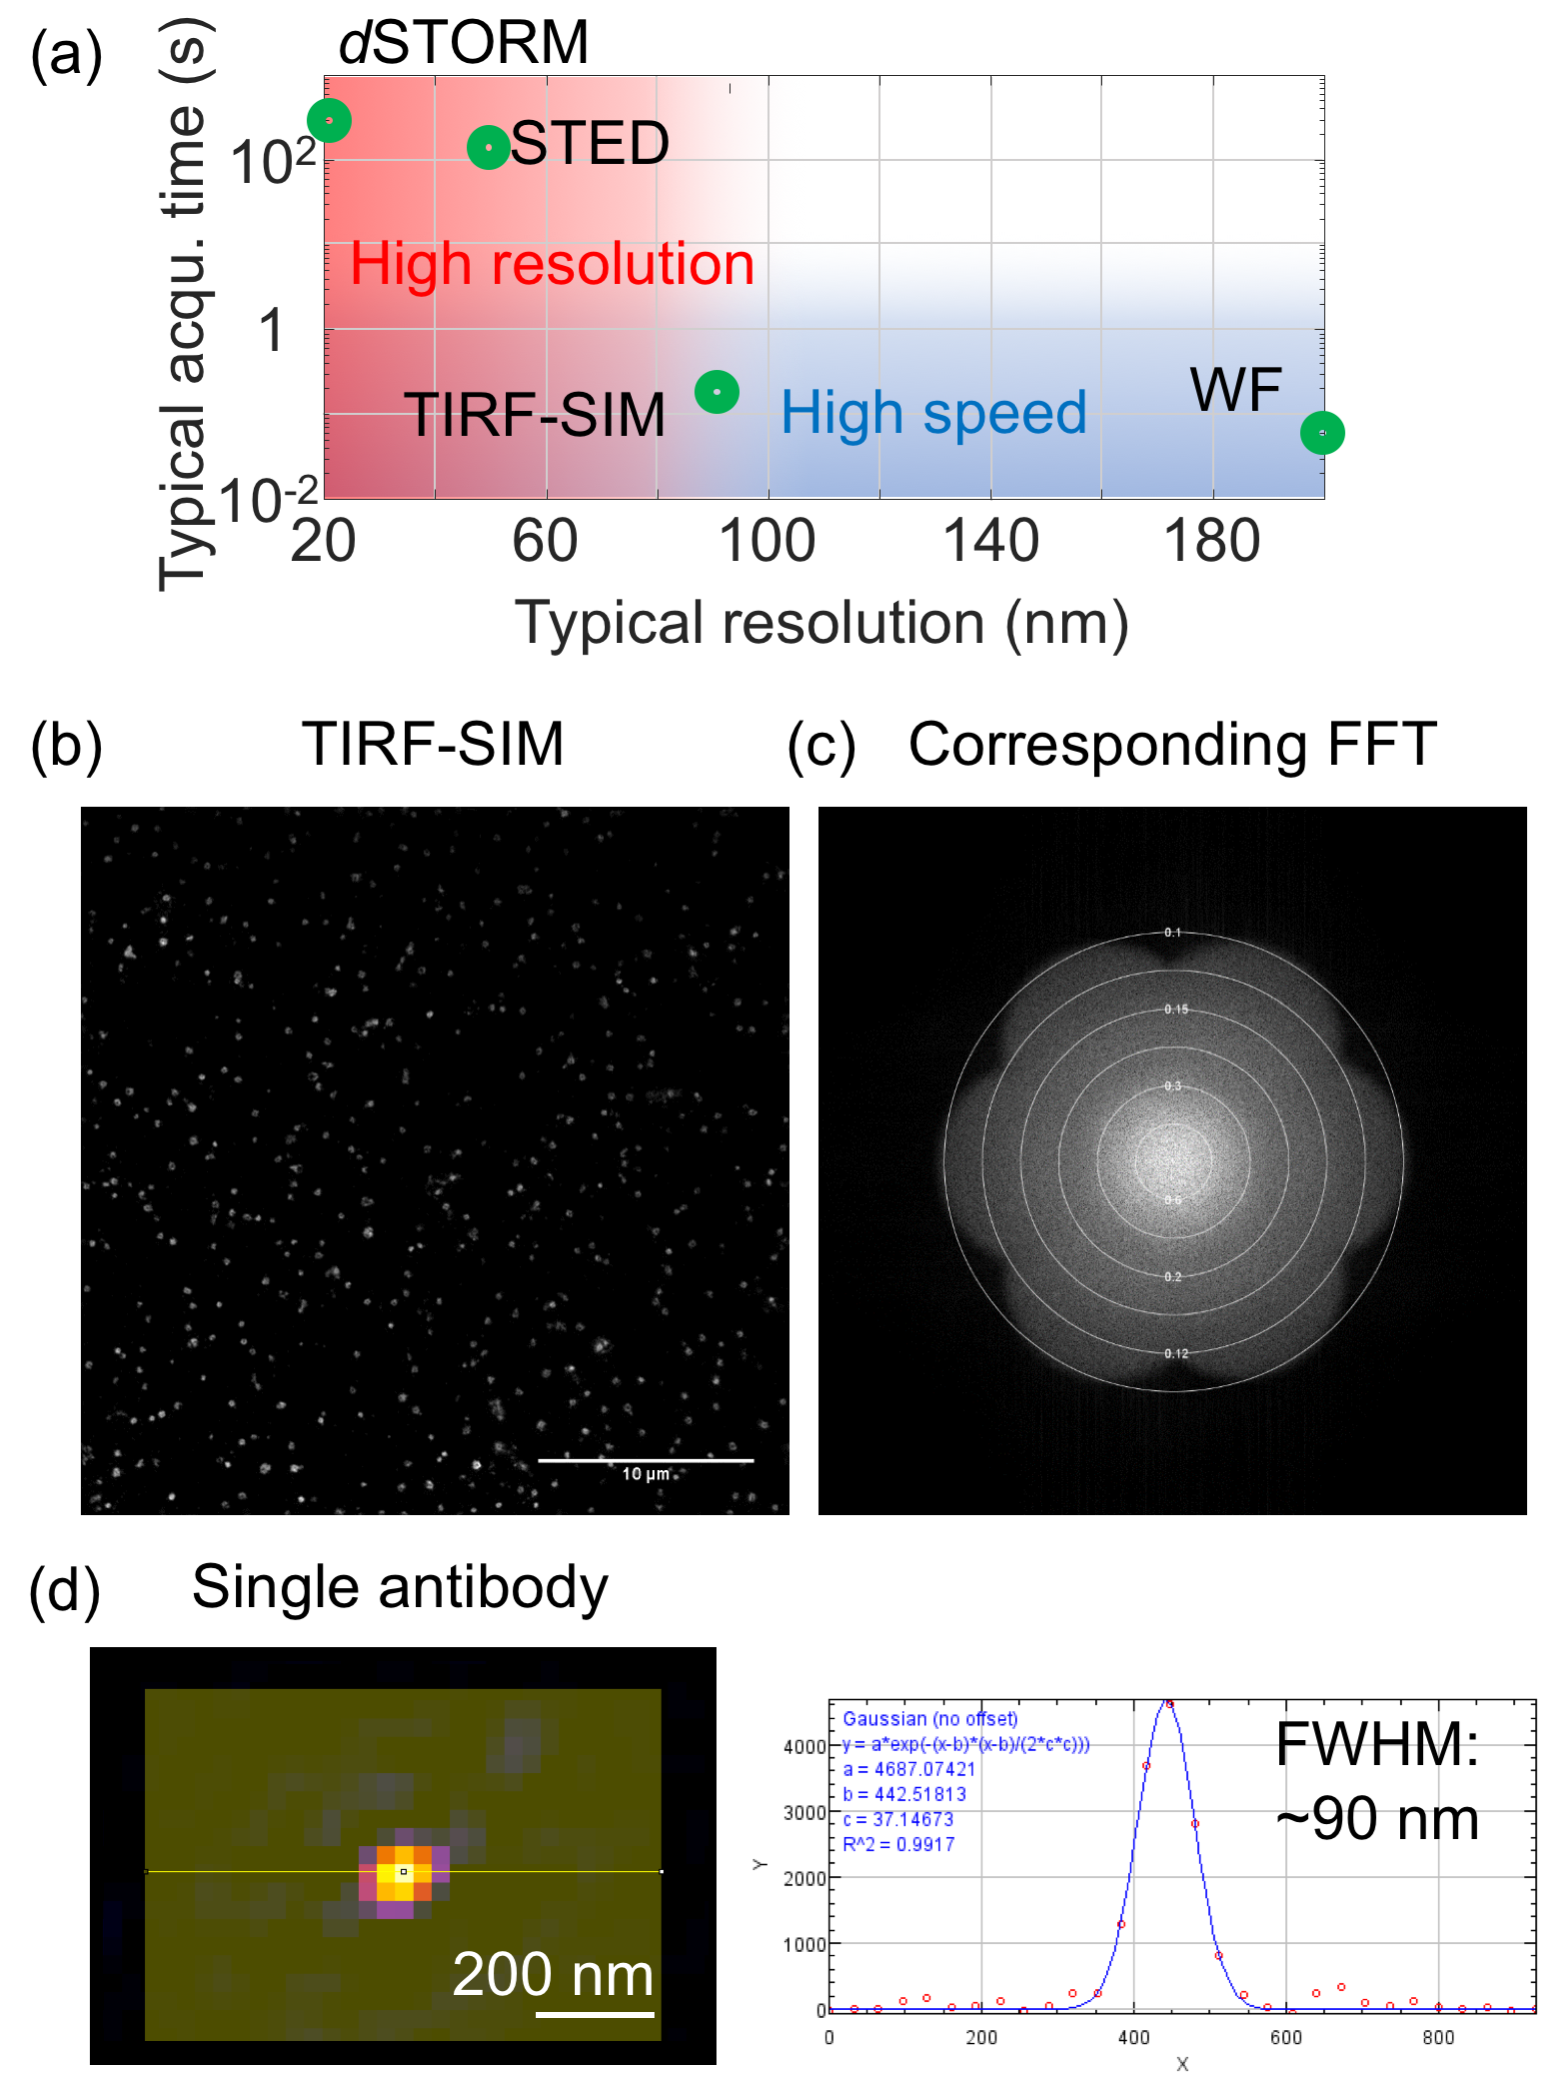

Supplement: supp [file elife-40183-supp-v1.zip › elife_poa_e40183_Figure_1_figure_supplement_1.tif]

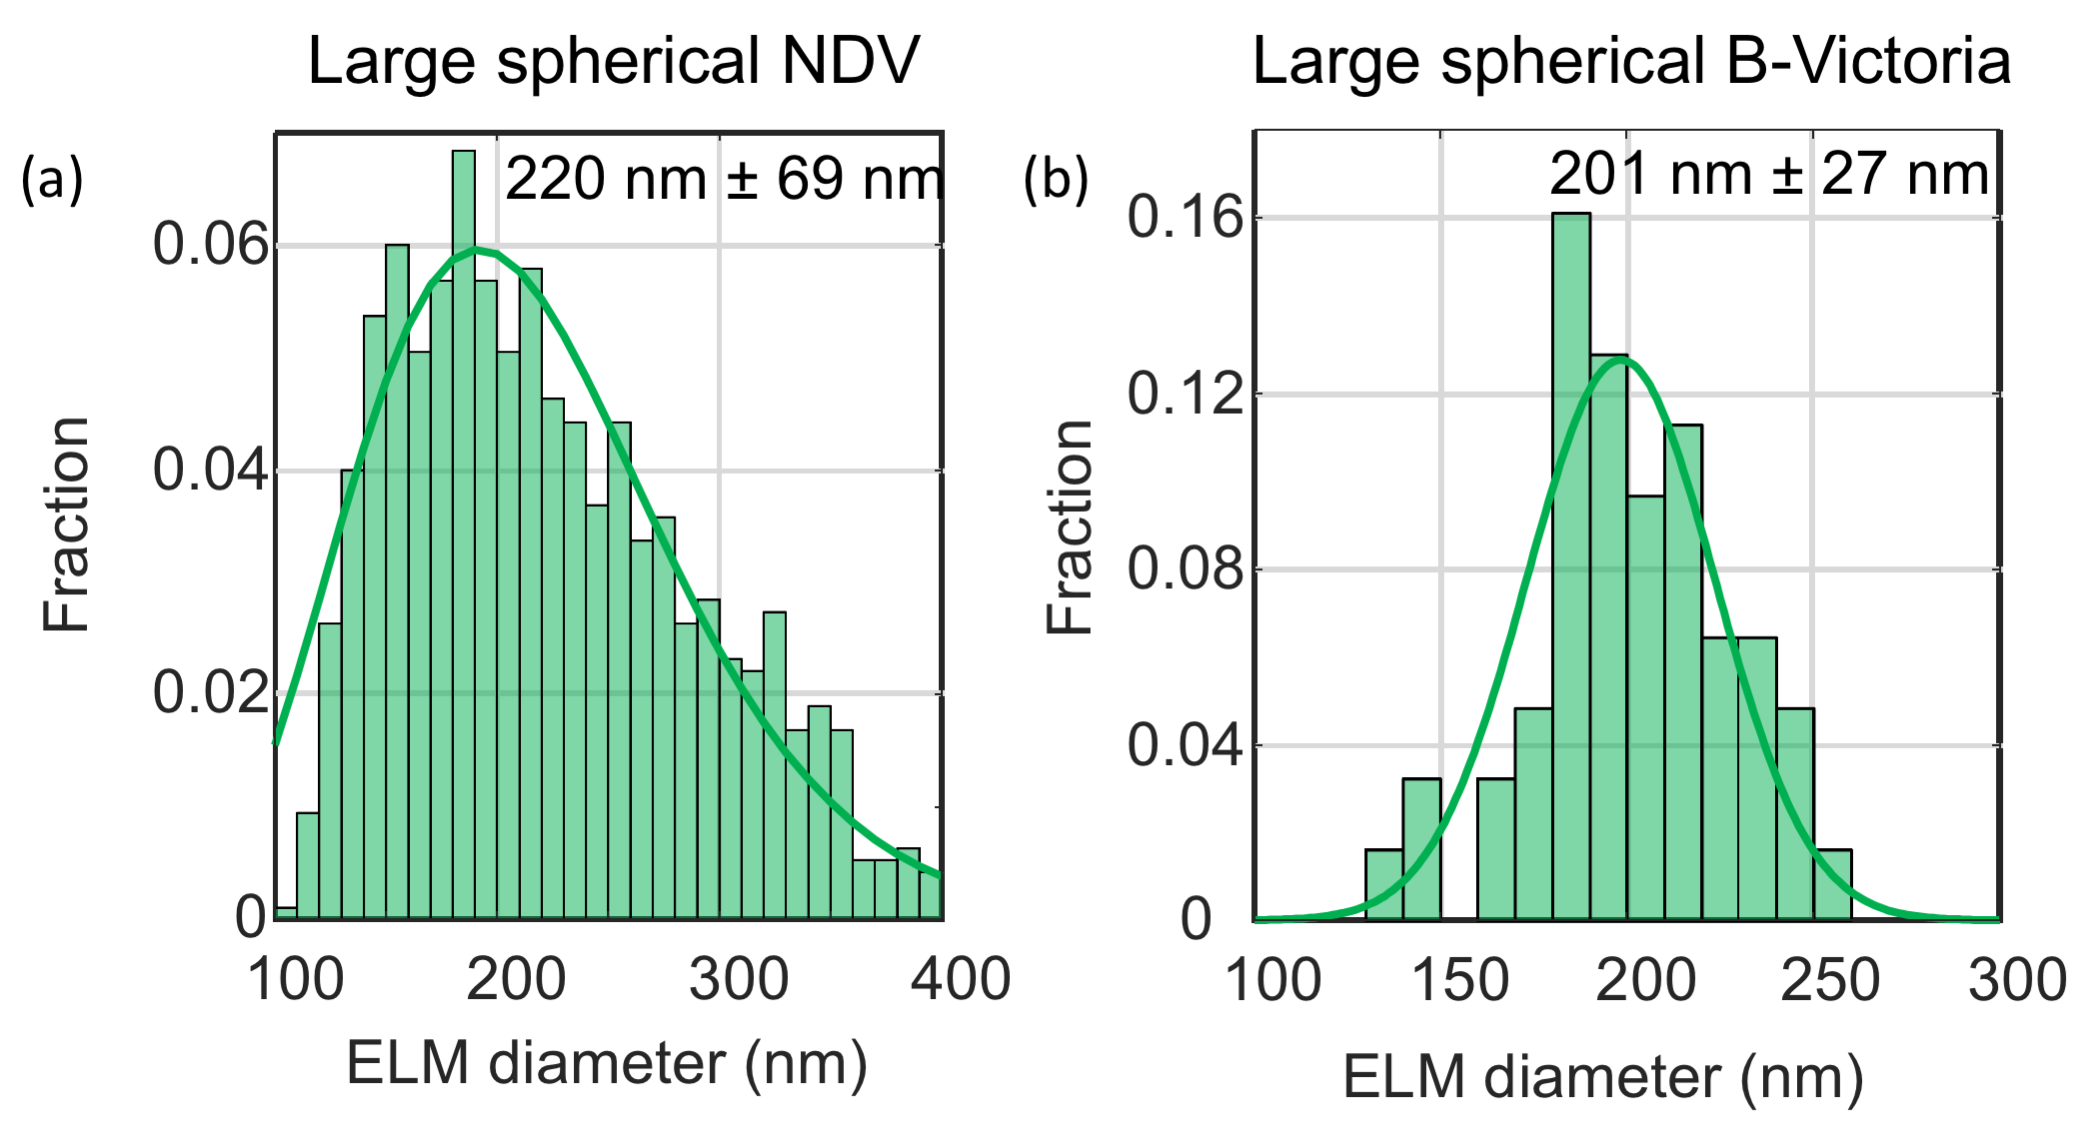

Supplement: supp [file elife-40183-supp-v1.zip › elife_poa_e40183_Figure_4_figure_supplement_1.tif]

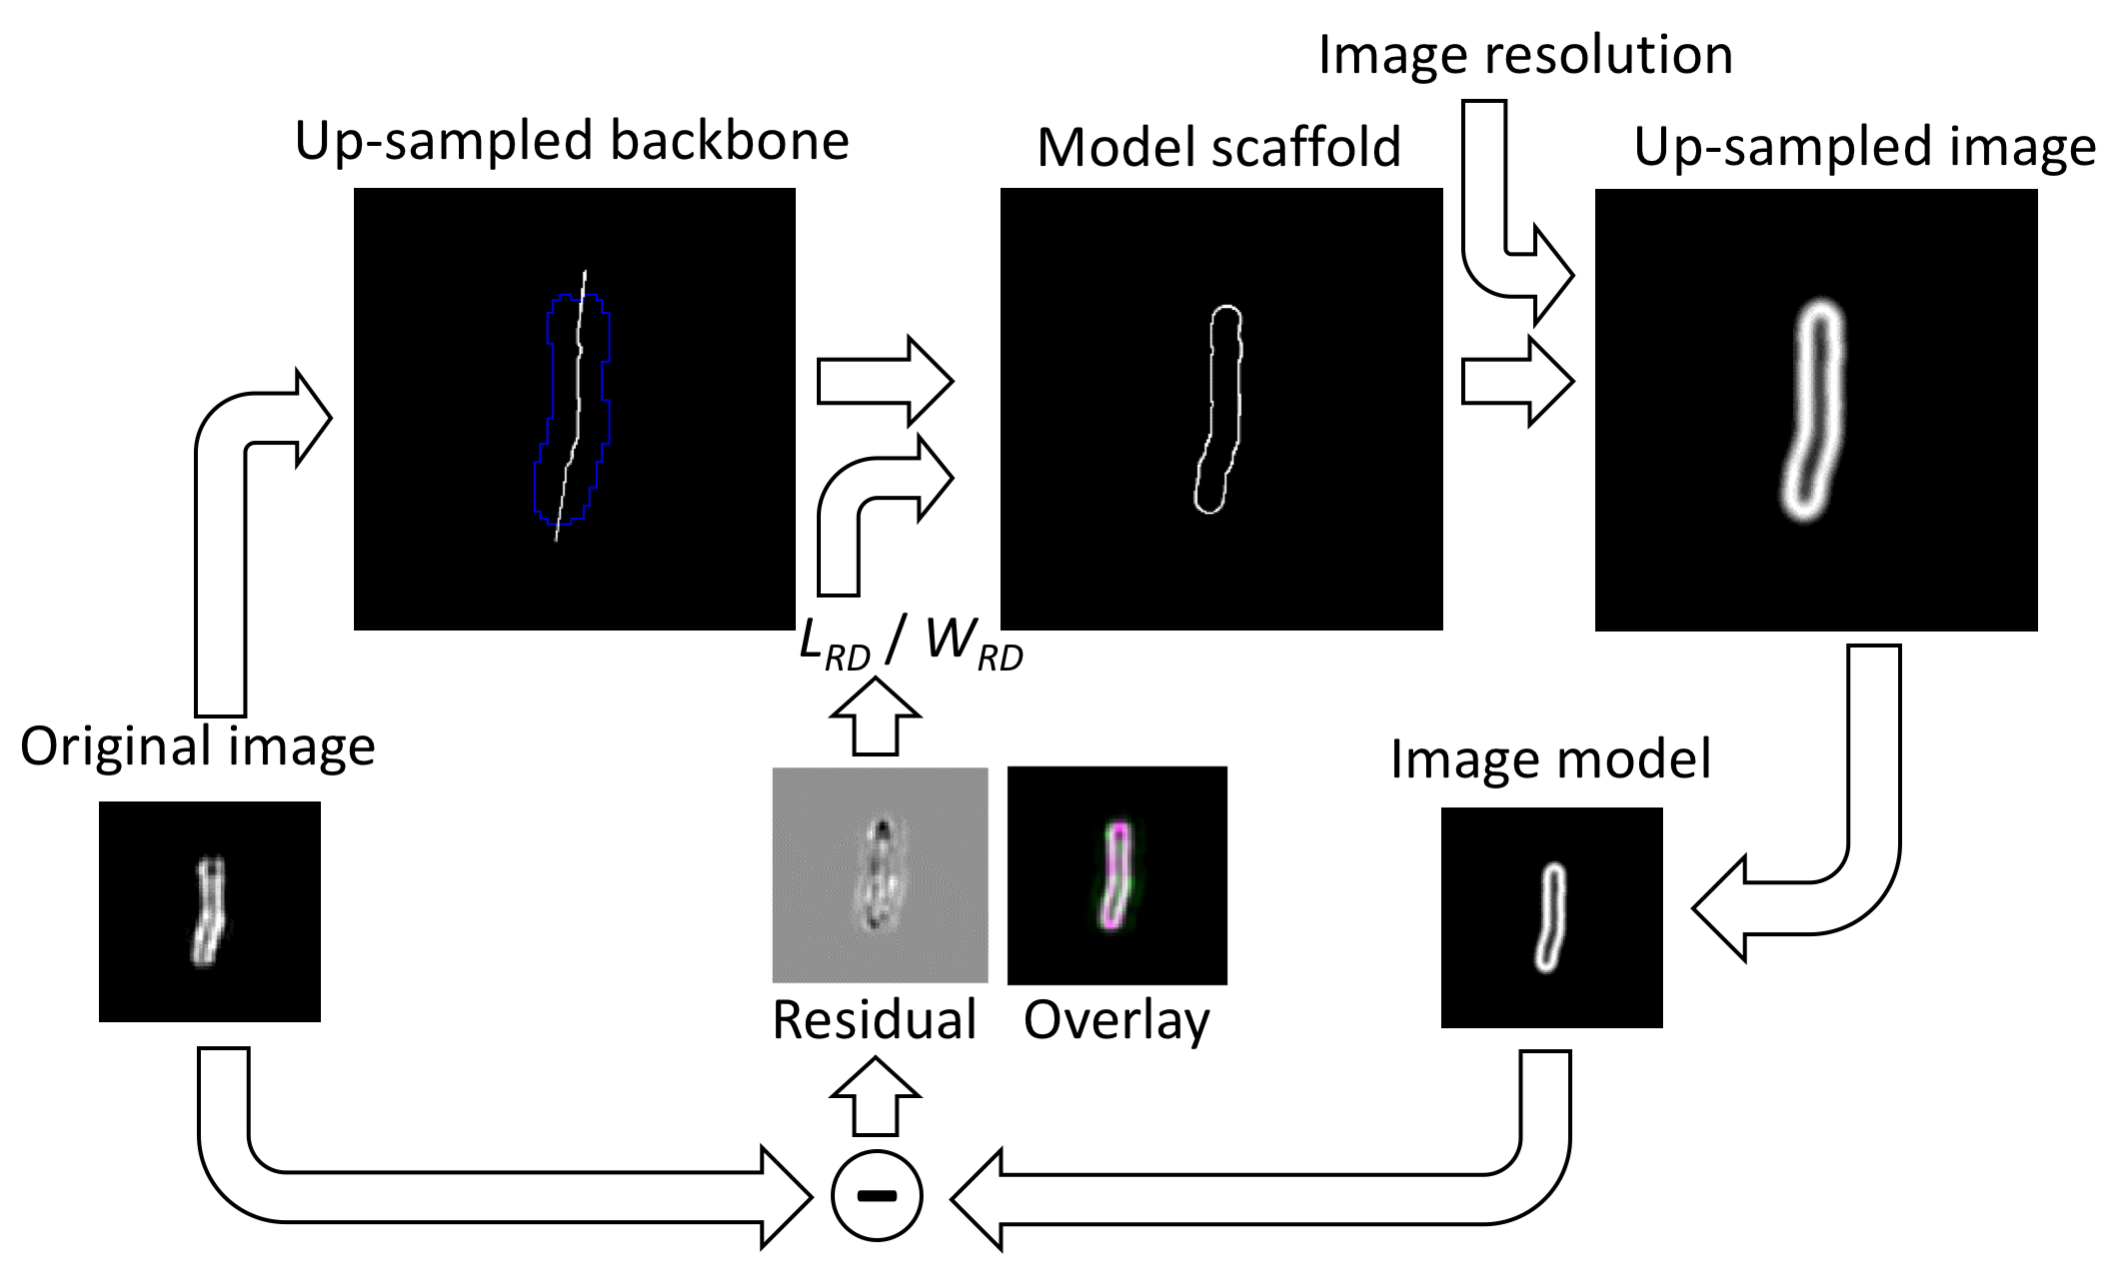

Supplement: supp [file elife-40183-supp-v1.zip › elife_poa_e40183_Figure_2_figure_supplement_1.tif]
